# Supplementary material
Source: PubMed Central journal article supplement (PMC4144787)

## Supporting information

**Table S1** Inter-correlation coefficients between biological triplicates

|              | 293_1F_2mm   | 293_6F_2mm   | 294_1F_2mm   |
|--------------|--------------|--------------|--------------|
| 293_1F_2mm   | <b>1.00</b>  | <b>0.96</b>  | <b>0.91</b>  |
| 293_6F_2mm   | <b>0.96</b>  | <b>1.00</b>  | <b>0.94</b>  |
| 294_1F_2mm   | <b>0.91</b>  | <b>0.94</b>  | <b>1.00</b>  |
|              | 293_7S_2mm   | 294_9S_2mm   | 294_6S_2mm   |
| 293_7S_2mm   | <b>1.00</b>  | <b>0.92</b>  | <b>0.94</b>  |
| 294_9S_2mm   | <b>0.92</b>  | <b>1.00</b>  | <b>0.98</b>  |
| 294_6S_2mm   | <b>0.94</b>  | <b>0.98</b>  | <b>1.00</b>  |
|              | 293_1F_1.5mm | 293_6F_1.5mm | ms8F_1.5mm   |
| 293_1F_1.5mm | 1.00         | 0.86         | 0.78         |
| 293_6F_1.5mm | 0.86         | 1.00         | 0.79         |
| ms8F_1.5mm   | 0.78         | 0.79         | 1.00         |
|              | 293_7S_1.5mm | 294_9S_1.5mm | 294_6S_1.5mm |
| 293_7S_1.5mm | 1.00         | 0.84         | 0.93         |
| 294_9S_1.5mm | 0.84         | 1.00         | 0.89         |
| 294_6S_1.5mm | 0.93         | 0.89         | 1.00         |

F: fertile; S: sterile.

**Table S2** Intra-correlation coefficients among technical triplicates

| Sample      | F 2 mm |       |       | S 2 mm |       |       | F 1.5 mm |       |      | S 1.5 mm |       |       |
|-------------|--------|-------|-------|--------|-------|-------|----------|-------|------|----------|-------|-------|
|             | 293_1  | 293_6 | 294_1 | 293_7  | 294_9 | 294_6 | 293_1    | 293_6 | ms8F | 293_7    | 294_9 | 294_6 |
| Correlation |        |       |       |        |       |       |          |       |      |          |       |       |
| run 1 to 2  | 0.82   | 0.88  | 0.85  | 0.87   | 0.95  | 0.94  | 0.88     | 0.88  | 0.94 | 0.86     | 0.89  | 0.91  |
| Correlation |        |       |       |        |       |       |          |       |      |          |       |       |
| run 2 to 3  | 0.90   | 0.90  | 0.85  | 0.90   | 0.96  | 0.93  | 0.93     | 0.88  | 0.91 | 0.87     | 0.85  | 0.91  |
| Correlation |        |       |       |        |       |       |          |       |      |          |       |       |
| run 1 to 3  | 0.82   | 0.89  | 0.91  | 0.89   | 0.93  | 0.96  | 0.89     | 0.85  | 0.93 | 0.86     | 0.86  | 0.91  |
| Average     | 0.84   | 0.89  | 0.87  | 0.89   | 0.95  | 0.94  | 0.90     | 0.87  | 0.93 | 0.86     | 0.87  | 0.91  |
| SD(±)       | 0.05   | 0.01  | 0.03  | 0.02   | 0.01  | 0.01  | 0.03     | 0.02  | 0.02 | 0.01     | 0.02  | 0.00  |

F: fertile; S: sterile.

**Table S3** Criteria for data filtration\*

| Peptide<br>FDR | Protein<br>FDR | Number of<br>assigned peptides | Minimum<br>number of times<br>spectra counted | Number of<br>unique proteins | Number of<br>spectra |
|----------------|----------------|--------------------------------|-----------------------------------------------|------------------------------|----------------------|
| 0.4%           | 7.6%           | 1+                             | 1+                                            | 2761                         | 70309                |
| 0.4%           | 7.6%           | 1+                             | 2+                                            | 672                          | 70309                |
| 0.3%           | 0.2%           | 2+                             | 2+                                            | 359                          | 57543                |

\* Additionally, minimum peptide identity probability of 95% and minimum protein identity probability of 90%.

**Table S4** Analysis of potential trans-membrane proteins

| Protein access number | Functional annotation<br>in <i>Zea mays</i>    | Protein molecular<br>weight (Da) | Presence in fertile<br>stages (mm) |
|-----------------------|------------------------------------------------|----------------------------------|------------------------------------|
| GRMZM2G032564         | 60 S ribosome protein                          | 26208.7                          | 1.5 and 2.0                        |
| GRMZM2G065355         | heat shock factor-binding<br>protein 1 isoform | 33596.6                          | 1.5                                |
| GRMZM2G104025         | heat shock factor-binding<br>protein 1 isoform | 37596.6                          | 2.0                                |

**Figure S1**

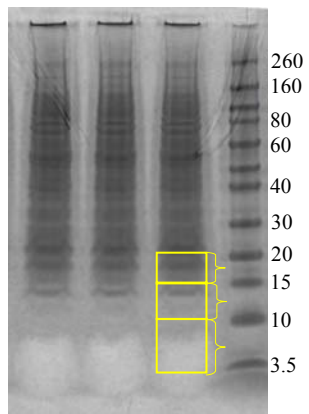

Figure S2

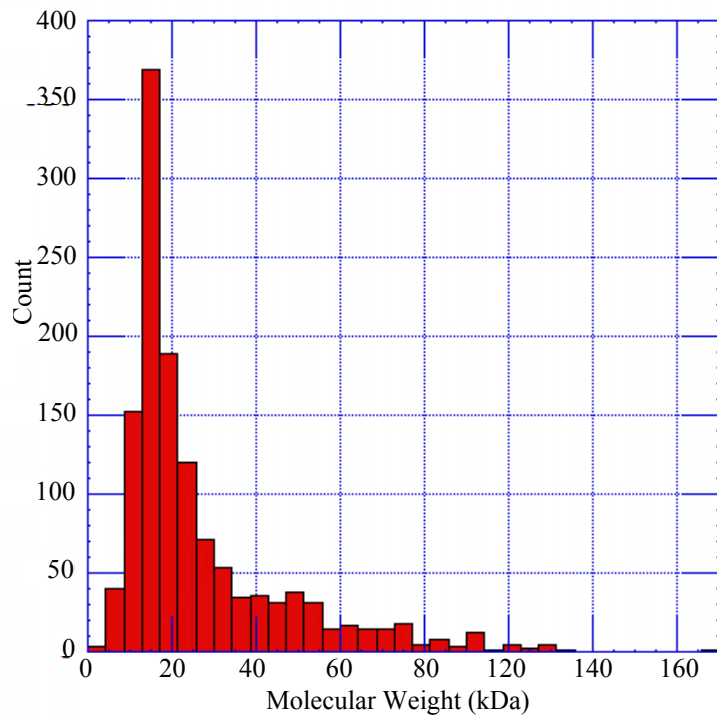

**Figure S3**

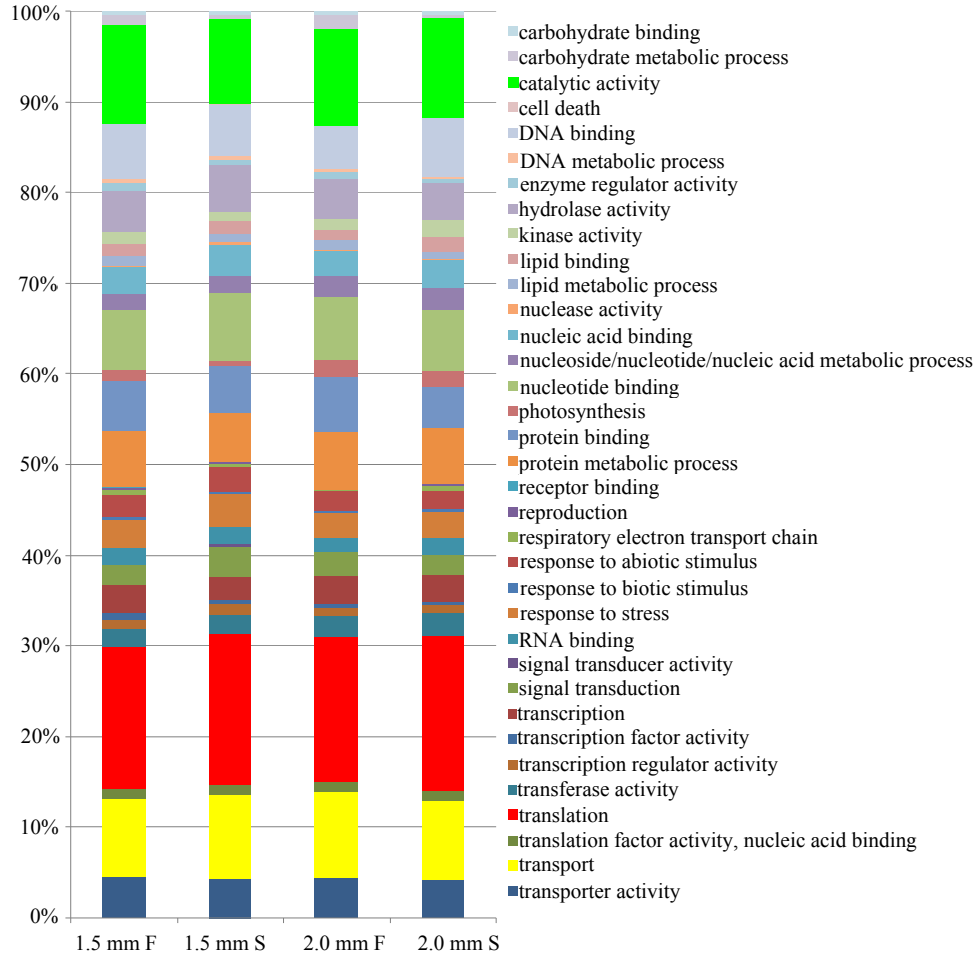

**Figure S4**

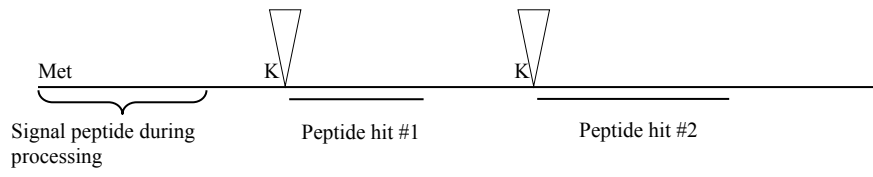



Figure S5

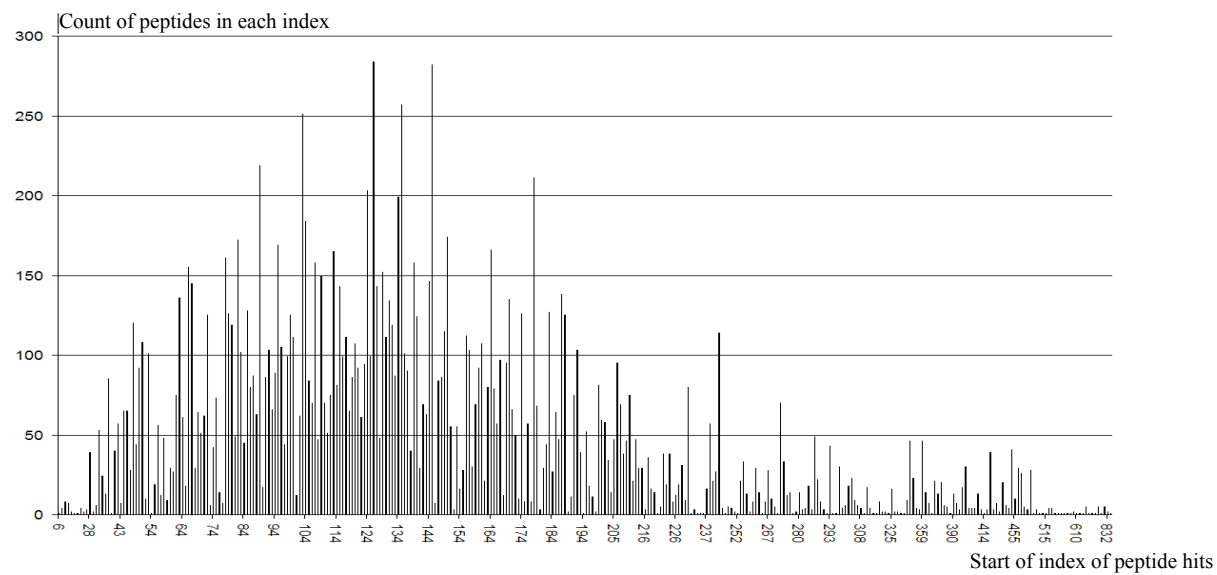

Supplement: NIHMS615515-supplement-TableS1-S4.pdf [file NIHMS615515-supplement-TableS1-S4.pdf]
