# Supplementary material
Source: PubMed Central journal article supplement (PMC4144787)
Supplement: NIHMS615515-supplement-supplement_1.pdf [file NIHMS615515-supplement-supplement_1.pdf]

- Ma, J., Duncan, D., Morrow, D.J., Fernandes, J. and Walbot, V. (2007) Transcriptome profiling of maize anthers using genetic ablation to analyze pre-meiotic and tapetal cell types. *Plant J.* **50**, 637–648.
- Ma, J., Skibbe, D.S., Fernandes, J. and Walbot, V. (2008) Male reproductive development: gene expression profiling of maize anther and pollen ontogeny. *Genome Biol.* **9**, R181.1–17.
- Magnard, J.L., Vergne, P. and Dumas, C. (1996) Complexity and genetic variability of heat-shock protein expression in isolated maize microsomes. *Plant Physiol.* **111**, 1085–1096.
- Nagar, S., Pedersen, T.J., Carrick, K.M., Hanley-Bowdoin, L. and Robinson, D. (1995) A geminivirus induces expression of a host DNA synthesis protein in terminally differentiated plant cells. *Plant Cell*, **7**, 705–719.
- Nan, G.L., Ronceret, A., Wang, R.C., Fernandes, J.F., Cande, W.Z. and Walbot, V. (2011) Global transcriptome analysis of two *ameiotic1* alleles in maize anthers: defining steps in meiotic entry and progression through prophase I. *BMC Plant Biol.* **11**, 1–20.
- Nesvizhskii, A.I. and Aebersold, R. (2005) Interpretation of shotgun proteomic data. *Mol. Cell. Proteomics*, **4**, 1419–1440.
- Nesvizhskii, A.I., Vitek, O. and Aebersold, R. (2007) Analysis and validation of proteomic data generated by tandem mass spectrometry. *Nat. Methods*, **10**, 787–797.
- Nguyen, H.T., Weng, J. and Joshi, C.P. (1993) A wheat (*Triticum aestivum*) cDNA clone encoding a plastid-localized heat-shock protein. *Plant Physiol.* **103**, 675–676.
- Old, W.M., Meyer-Arendt, K., Aveline-Wolf, L., Pierce, K.G., Mendoza, A., Sevinsky, J.R., Resing, K.A. and Ahn, N.G. (2005) Comparison of label-free methods for quantifying human proteins by shotgun proteomics. *Mol. Cell. Proteomics*, **4**, 1487–1502.
- Pawlowski, W.P., Wang, C.R., Golubovskaya, I.N., Szymaniak, J.M., Shi, L., Hamant, O., Zhu, T., Harper, L., Sheridan, W.F. and Cande, W.Z. (2009) Maize AMEOTIC1 is essential for multiple early meiotic processes and likely required for the initiation of meiosis. *Proc. Natl. Acad. Sci. USA*, **106**, 3603–3608.
- Pearce, R. (2001) Plant freezing and damage. *Ann. Bot.* **87**, 417–424.
- Sheridan, W.F., Golubeva, E.A., Ahrhmová, L.I. and Golubovskaya, I.N. (1999) The *mac1* mutation alters the developmental fate of the hypodermal cells and their cellular progeny in the maize anthers. *Genetics*, **153**, 933–941.
- Shevchenko, A., Wilm, M., Vorm, O. and Mann, M. (1996) Mass spectrometric sequencing of proteins from silver-stained polyacrylamide gels. *Anal. Chem.* **68**, 850–858.
- Shevchenko, A., Tomas, H., Havlis, J., Olsen, J.V. and Mann, M. (2007) In-gel digestion for mass spectrometric characterization of proteins and proteomes. *Nat. Protoc.* **6**, 2856–2860.
- Silverstein, K.A.T., Moskal, J.W.A., Wu, H.C., Underwood, B.A., Graham, M.A., Town, C.D. and VandenBosch, K.A. (2007) Small cysteine-rich peptides resembling antimicrobial peptides have been under-predicted in plants. *Plant J.* **51**, 262–280.
- Skibbe, D.S., Fernandes, J.F., Medzihradsky, K.F., Burlingame, A.L. and Walbot, V. (2009) Mutator transposon activity reprograms the transcriptomes and proteomes of developing maize anthers. *Plant J.* **59**, 622–633.
- Skibbe, D.S., Doehlemann, G., Fernandes, J.F. and Walbot, V. (2010) Maize tumor formation after *Ustilago maydis* infection requires organ-specific gene expression by both partners. *Science*, **328**, 89–92.
- Soderlund, C., Descour, A., Kudrna, D., Bomhoff, M., Boyd, L., Currie, J., Angelova, A., Collura, K., Wissotski, M., Ashley, E., Morrow, D.J., Fernandes, J.F., Walbot, V. and Yu, Y. (2009) Sequencing, mapping and analysis of 27,455 maize full-length cDNAs. *PLoS Genet.* **5**, e1000740.
- Sun, Q., Hu, C., Hu, J., Li, S. and Zhu, Y. (2009) Quantitative proteomic analysis of CMS-related changes in Honglian CMS rice anther. *Protein J.* **28**, 341–348.
- Suzuki, T.C., Krawitz, D.C. and Vierling, E. (1998) The chloroplast small heat-shock protein oligomer is not phosphorylated and does not dissociate during heat stress *in vivo*. *Plant Physiol.* **116**, 1151–1161.
- Vernoud, V., Laigle, G., Rozier, F., Meeley, R.B., Perez, P. and Rogovsky, P.M. (2009) The HD-ZIP IV transcription factor OCL4 is necessary for trichome patterning and anther development in maize. *Plant J.* **59**, 883–894.
- Wang, W., Vinocur, B., Shoseyov, O. and Altman, A. (2004) Role of plant heat-shock proteins and molecular chaperones in the abiotic stress response. *Trends Plant Sci.* **9**, 244–252.
- Wang, D., Li, C., Zhao, Q., Zhao, L., Wang, M., Zhu, D., Ao, G. and Yu, J. (2009) *Zm401p10*, encoded by an anther-specific gene with short open reading frames, is essential for tapetum degeneration and anther development in maize. *Funct. Plant Biol.* **36**, 73–85.
- Wang, D., Osés-Prieto, J.A., Li, K.H., Fernandes, J.F., Burlingame, A.L. and Walbot, V. (2010) The *male sterile 8* mutation of maize disrupts the temporal progression of the transcriptome and results in the mis-regulation of metabolic functions. *Plant J.* **63**, 939–951.
- Wang, D., Skibbe, D.S. and Walbot, V. (2011) Maize *csmd1* exhibits pre-meiotic somatic and post-meiotic microspore and somatic defects but sustains anther growth. *Sex. Plant Reprod.* **24**, 297–306.
- Wong, C.C.L., Cociorva, D., Venable, J.D., Xu, T. and Yates III, J.R. (2009) Comparison of different signal thresholds on data dependent sampling in orbitrap and LTQ mass spectrometry for the identification of peptides and proteins in complex mixtures. *J. Am. Soc. Mass Spectrom.* **20**, 1405–1414.
- Xing, S. and Zachgo, S. (2008) ROXY1 and ROXY2, two Arabidopsis glutaredoxin genes, are required for anther development. *Plant J.* **5**, 790–801.
- Xu, J. and Scheres, B. (2005) Dissection of Arabidopsis ADP-RIBOSYLATION FACTOR 1 function in epidermal cell polarity. *Plant Cell*, **17**, 525–536.
- Yang, S.L., Xie, L.F., Mao, H.Z., Puah, C.S., Yang, W.C., Jiang, L., Sundaresan, V. and Ye, D. (2003) *TAPETUM DETERMINANT1* is required for cell specialization in the Arabidopsis anther. *Plant Cell*, **15**, 2792–2804.
- Zhang, B., VerBerkmoes, N.C., Langston, M.A., Uberbacher, E., Hettich, R.L. and Samatova, N.F. (2006) Detecting differential and correlated protein expression in label-free shotgun proteomics. *J. Proteom. Res.* **5**, 2909–2918.
- Zhao, X., Palma, J.D., Oane, R., Gamuyao, R., Luo, M., Chaudhury, A., Herve, P., Xue, Q. and Bennett, J. (2008) OsTDL1A binds to the LRR domain of rice receptor kinase MSP1, and is required to limit sporocyte numbers. *Plant J.* **54**, 375–387.

## Supporting information

Additional Supporting information may be found in the online version of this article:

**Figure S1** Gel image for three samples of 1.5-mm anther proteins. Each lane is one of three technical replicates of sample 293\_1F\_1.5 mm. The boxes indicate the gel regions recovered for the 3.5–10, 10–15 and 15–20 kDa samples. Size markers in kDa are shown on the right.

**Figure S2** 68% of all proteins were <25 kDa, as expected. The x-axis is molecular weight, the y-axis is protein count.

**Figure S3** Gene ontology annotation for identified proteins in all four sample types. Percentage of each gene ontology category of expressed proteins in fertile or sterile anthers at different developmental stages. Categories are in alphabetical order, starting from the top of the list.

**Figure S4** Protein models for the trans-membrane peptide search.

**Figure S5** Peptide start index count.

**Table S1** Inter-correlation coefficients between biological triplicates.

**Table S2** Intra-correlation coefficients among technical triplicates.

**Table S3** Criteria for data filtration.

**Table S4** Analysis of potential trans-membrane proteins.

**Table S5** GO analysis for 55 proteins that were only identified in the low molecular proteome with more than two assigned peptide, 0.3% peptide FDR and 0.1% protein FDR.

**Table S6** GO analysis for 612 proteins that were only identified in the low molecular proteome with at least one assigned peptide, 0.3% peptide FDR and 5.6% protein FDR.

**Table S7** GO annotation for the high confidence set of proteins to identify stage-specific and fertile or sterile restricted expression. Note that some proteins are represented in more than one GO category; some proteins identified in this study lacked any GO annotation.

Please note: Wiley-Blackwell are not responsible for the content or functionality of any supporting materials supplied by the authors. Any queries (other than missing material) should be directed to the corresponding author for the article.
