# Supplementary material
Source: PubMed Central journal article supplement (PMC4144787)
Supplement: NIHMS615515-supplement-TableS5-S6.pdf [file NIHMS615515-supplement-TableS5-S6.pdf]

|               |        |                                           |
|---------------|--------|-------------------------------------------|
| GRMZM2G009189 | 0.00   |                                           |
| GRMZM2G009653 | 0.00   |                                           |
| GRMZM2G009673 | 12.33  |                                           |
| GRMZM2G009735 | 0.00   |                                           |
| GRMZM2G009928 | 40.20  | Putative small multi-drug export          |
| GRMZM2G009928 | 40.20  | Putative small multi-drug export          |
| GRMZM2G009928 | 40.20  | Putative small multi-drug export          |
| GRMZM2G010302 | 0.00   | Single-stranded nucleic acid binding R3H  |
| GRMZM2G010868 | 13.89  | amylase inhibitor                         |
| GRMZM2G010868 | 13.89  | amylase inhibitor                         |
| GRMZM2G011513 |        | C2 calcium-dependent membrane targeting   |
| GRMZM2G011518 | 0.00   | Small GTP-binding protein                 |
| GRMZM2G011518 | 0.00   | Small GTP-binding protein                 |
| GRMZM2G011518 | 0.00   | Small GTP-binding protein                 |
| GRMZM2G011862 | 0.00   | Kelch repeat type 2                       |
| GRMZM2G011919 | 0.00   | Tyrosine protein kinase                   |
| GRMZM2G011919 | 0.00   | Tyrosine protein kinase                   |
| GRMZM2G011919 | 0.00   | Tyrosine protein kinase                   |
| GRMZM2G011919 | 0.00   | Tyrosine protein kinase                   |
| GRMZM2G011919 | 0.00   | Tyrosine protein kinase                   |
| GRMZM2G011919 | 0.00   | Tyrosine protein kinase                   |
| GRMZM2G012021 | 0.00   | Protein of unknown function DUF231, plant |
| GRMZM2G012041 | 0.00   | Zinc finger, CCCH-type                    |
| GRMZM2G012041 | 0.00   | Zinc finger, CCCH-type                    |
| GRMZM2G012200 | 0.00   |                                           |
| GRMZM2G012453 | 0.00   | S1, RNA binding                           |
| GRMZM2G012453 | 0.00   | S1, RNA binding                           |
| GRMZM2G012453 | 0.00   | S1, RNA binding                           |
| GRMZM2G012453 | 0.00   | S1, RNA binding                           |
| GRMZM2G012891 | 0.00   | Antifreeze protein, type I                |
| GRMZM2G012891 | 0.00   | Antifreeze protein, type I                |
| GRMZM2G012891 | 0.00   | Antifreeze protein, type I                |
| GRMZM2G013115 | 108.78 | DNA topoisomerase, type IIA, subunit B    |
| GRMZM2G013115 | 108.78 | DNA topoisomerase, type IIA, subunit B    |
| GRMZM2G013115 | 108.78 | DNA topoisomerase, type IIA, subunit B    |
| GRMZM2G013115 | 108.78 | DNA topoisomerase, type IIA, subunit B    |
| GRMZM2G013607 | 24.37  | Ferredoxin                                |
| GRMZM2G013607 | 24.37  | Ferredoxin                                |
| GRMZM2G013695 | 0.00   | Thioredoxin-like fold                     |
| GRMZM2G013695 | 0.00   | Thioredoxin-like fold                     |
| GRMZM2G013695 | 0.00   | Thioredoxin-like fold                     |
| GRMZM2G014119 | 0.00   | Ubiquitin                                 |
| GRMZM2G014395 | 0.00   | Cytochrome P450, E-class, group IV        |

|               |      |                                                  |
|---------------|------|--------------------------------------------------|
| GRMZM2G014395 | 0.00 | Cytochrome P450, E-class, group IV               |
| GRMZM2G014395 | 0.00 | Cytochrome P450, E-class, group IV               |
| GRMZM2G015395 | 0.00 | Kinesin, motor region                            |
| GRMZM2G015395 | 0.00 | Kinesin, motor region                            |
| GRMZM2G015395 | 0.00 | Kinesin, motor region                            |
| GRMZM2G015605 | 0.00 | Uncharacterised protein family UPF0057           |
| GRMZM2G016097 |      | Like-Sm ribonucleoprotein-related, core          |
| GRMZM2G016232 |      | TATA box binding protein associated factor (TAF) |
| GRMZM2G016232 |      | TATA box binding protein associated factor (TAF) |
| GRMZM2G016232 |      | TATA box binding protein associated factor (TAF) |
| GRMZM2G016605 | 0.00 | Lipase, GDXG, active site                        |
| GRMZM2G016738 | 0.00 |                                                  |
| GRMZM2G016878 | 0.00 | Kelch repeat type 2                              |
| GRMZM2G017419 | 0.00 | Thioredoxin-like subdomain                       |
| GRMZM2G017682 | 0.00 |                                                  |
| GRMZM2G018314 | 0.00 | DEAD-like helicase, N-terminal                   |
| GRMZM2G018447 | 0.00 | Ubiquitin-conjugating enzyme/RWD-like            |
| GRMZM2G018678 | 0.00 |                                                  |
| GRMZM2G019553 | 0.00 | Cytochrome C biogenesis protein CcmH             |
| GRMZM2G019746 | 0.00 | AMP-dependent synthetase and ligase              |
| GRMZM2G020934 | 0.00 |                                                  |
| GRMZM2G021055 | 0.00 | Multi antimicrobial extrusion protein MatE       |
| GRMZM2G021055 | 0.00 | Multi antimicrobial extrusion protein MatE       |
| GRMZM2G021694 | 0.00 | Protein of unknown function DUF177               |
| GRMZM2G021865 | 0.00 | EF-HAND 1                                        |
| GRMZM2G022206 | 0.00 | Ubiquitin-conjugating enzyme/RWD-like            |
| GRMZM2G022206 | 0.00 | Ubiquitin-conjugating enzyme/RWD-like            |
| GRMZM2G022206 | 0.00 | Ubiquitin-conjugating enzyme/RWD-like            |
| GRMZM2G023387 | 0.00 | Thioredoxin-like subdomain                       |
| GRMZM2G023836 | 0.00 | Tyrosine protein kinase                          |
| GRMZM2G023836 | 0.00 | Tyrosine protein kinase                          |
| GRMZM2G023836 | 0.00 | Tyrosine protein kinase                          |
| GRMZM2G025243 | 0.00 | Short-chain dehydrogenase/reductase SDR          |
| GRMZM2G025243 | 0.00 | Short-chain dehydrogenase/reductase SDR          |
| GRMZM2G025243 | 0.00 | Short-chain dehydrogenase/reductase SDR          |
| GRMZM2G025954 |      | Thioredoxin-like subdomain                       |
| GRMZM2G026322 | 0.00 | Cytochrome P450, E-class, group IV               |
| GRMZM2G026322 | 0.00 | Cytochrome P450, E-class, group IV               |
| GRMZM2G026322 | 0.00 | Cytochrome P450, E-class, group IV               |
| GRMZM2G026447 | 0.00 | component/perforin/complement C9                 |

|               |       |                                                      |
|---------------|-------|------------------------------------------------------|
| GRMZM2G027232 | 19.47 | Ribosomal protein L11, bacterial-type                |
| GRMZM2G027232 | 19.47 | Ribosomal protein L11, bacterial-type                |
| GRMZM2G027392 | 0.00  | B12D                                                 |
| GRMZM2G027592 | 0.00  | Zinc finger, PHD-type                                |
| GRMZM2G027592 | 0.00  | Zinc finger, PHD-type                                |
| GRMZM2G027857 | 0.00  | Syntaxin, N-terminal                                 |
| GRMZM2G027860 | 0.00  | ATPase, P-type, K/Mg/Cd/Cu/Zn/Na/Ca/Na/H-transporter |
| GRMZM2G027860 | 0.00  | ATPase, P-type, K/Mg/Cd/Cu/Zn/Na/Ca/Na/H-transporter |
| GRMZM2G027860 | 0.00  | ATPase, P-type, K/Mg/Cd/Cu/Zn/Na/Ca/Na/H-transporter |
| GRMZM2G027860 | 0.00  | ATPase, P-type, K/Mg/Cd/Cu/Zn/Na/Ca/Na/H-transporter |
| GRMZM2G029713 | 0.00  | Armadillo-type fold                                  |
| GRMZM2G030528 | 0.00  |                                                      |
| GRMZM2G030583 | 0.00  | Terpenoid synthase                                   |
| GRMZM2G030583 | 0.00  | Terpenoid synthase                                   |
| GRMZM2G030762 | 0.00  | Peptidase M14, carboxypeptidase A                    |
| GRMZM2G030762 | 0.00  | Peptidase M14, carboxypeptidase A                    |
| GRMZM2G030762 | 0.00  | Peptidase M14, carboxypeptidase A                    |
| GRMZM2G030762 | 0.00  | Peptidase M14, carboxypeptidase A                    |
| GRMZM2G030762 | 0.00  | Peptidase M14, carboxypeptidase A                    |
| GRMZM2G030762 | 0.00  | Peptidase M14, carboxypeptidase A                    |
| GRMZM2G031204 |       | Peptidyl-prolyl cis-trans isomerase, FKBP-type       |
| GRMZM2G031501 | 0.00  | MTCP1                                                |
| GRMZM2G031568 | 0.00  |                                                      |
| GRMZM2G031620 | 0.00  | Antifreeze protein, type I                           |
| GRMZM2G031620 | 0.00  | Antifreeze protein, type I                           |
| GRMZM2G031620 | 0.00  | Antifreeze protein, type I                           |
| GRMZM2G033138 | 0.00  | Zinc finger, PHD-type                                |
| GRMZM2G033138 | 0.00  | Zinc finger, PHD-type                                |
| GRMZM2G033138 | 0.00  | Zinc finger, PHD-type                                |
| GRMZM2G033138 | 0.00  | Zinc finger, PHD-type                                |
| GRMZM2G033138 | 0.00  | Zinc finger, PHD-type                                |
| GRMZM2G033867 | 0.00  |                                                      |
| GRMZM2G034096 | 25.70 | Protein of unknown function DUF498                   |
| GRMZM2G034225 | 16.49 |                                                      |
| GRMZM2G034896 | 0.00  | Riboflavin synthase-like beta-barrel                 |
| GRMZM2G034896 | 0.00  | Riboflavin synthase-like beta-barrel                 |
| GRMZM2G034896 | 0.00  | Riboflavin synthase-like beta-barrel                 |
| GRMZM2G034896 | 0.00  | Riboflavin synthase-like beta-barrel                 |
| GRMZM2G035708 | 0.00  | Peptidyl-prolyl cis-trans isomerase, FKBP-type       |
| GRMZM2G036629 | 0.00  | Plant metallothionein, family 15                     |
| GRMZM2G037413 | 0.00  | Zinc finger, RING-type                               |
| GRMZM2G037413 | 0.00  | Zinc finger, RING-type                               |
| GRMZM2G037413 | 0.00  | Zinc finger, RING-type                               |

|               |        |                                              |
|---------------|--------|----------------------------------------------|
| GRMZM2G037413 | 0.00   | Zinc finger, RING-type                       |
| GRMZM2G037413 | 0.00   | Zinc finger, RING-type                       |
| GRMZM2G038375 | 0.00   | Tim17/22                                     |
| GRMZM2G038375 | 0.00   | Tim17/22                                     |
| GRMZM2G039312 | 0.00   | Protein of unknown function DUF623, plant    |
| GRMZM2G039381 | 13.89  | Plastocyanin-like                            |
| GRMZM2G039381 | 13.89  | Plastocyanin-like                            |
| GRMZM2G039622 | 0.00   | Target SNARE coiled-coil region              |
| GRMZM2G039949 | 142.13 |                                              |
| GRMZM2G040673 | 0.00   | Protein of unknown function DUF623, plant    |
| GRMZM2G040673 | 0.00   | Protein of unknown function DUF623, plant    |
| GRMZM2G040673 | 0.00   | Protein of unknown function DUF623, plant    |
| GRMZM2G040673 | 0.00   | Protein of unknown function DUF623, plant    |
| GRMZM2G040843 | 0.00   | Six-hairpin glycosidase-like                 |
| GRMZM2G042078 |        | ATPase, F0 complex, subunit G, mitochondrial |
| GRMZM2G042078 |        | ATPase, F0 complex, subunit G, mitochondrial |
| GRMZM2G042078 |        | ATPase, F0 complex, subunit G, mitochondrial |
| GRMZM2G042078 |        | ATPase, F0 complex, subunit G, mitochondrial |
| GRMZM2G042164 | 0.00   | Peptidase S26A, signal peptidase I           |
| GRMZM2G042164 | 0.00   | Peptidase S26A, signal peptidase I           |
| GRMZM2G042164 | 0.00   | Peptidase S26A, signal peptidase I           |
| GRMZM2G042881 | 0.00   | Uncharacterised protein family UPF0414       |
| GRMZM2G044180 | 0.00   | Protein kinase-like                          |
| GRMZM2G044180 | 0.00   | Protein kinase-like                          |
| GRMZM2G044180 | 0.00   | Protein kinase-like                          |
| GRMZM2G044440 | 0.00   | Ubiquitin                                    |
| GRMZM2G044963 |        | Recoverin                                    |
| GRMZM2G045084 | 0.00   | Zinc finger, RING-type                       |
| GRMZM2G045084 | 0.00   | Zinc finger, RING-type                       |
| GRMZM2G045236 | 0.00   | cAMP response element binding (CREB) protein |
| GRMZM2G045236 | 0.00   | cAMP response element binding (CREB) protein |
| GRMZM2G045236 | 0.00   | cAMP response element binding (CREB) protein |
| GRMZM2G045236 | 0.00   | cAMP response element binding (CREB) protein |
| GRMZM2G045268 | 0.00   |                                              |
| GRMZM2G045844 | 0.00   | Harpin-induced 1                             |
| GRMZM2G046676 | 0.00   | Snf7                                         |
| GRMZM2G046846 | 0.00   | Protein of unknown function DUF668           |
| GRMZM2G046961 | 21.77  |                                              |
| GRMZM2G047299 | 0.00   | Uncharacterised protein family UPF0041       |

|               |      |                                        |
|---------------|------|----------------------------------------|
| GRMZM2G047533 | 0.00 | Alpha/beta hydrolase fold-1            |
| GRMZM2G047588 | 0.00 | Tyrosine protein kinase                |
| GRMZM2G047588 | 0.00 | Tyrosine protein kinase                |
| GRMZM2G047588 | 0.00 | Tyrosine protein kinase                |
| GRMZM2G048672 | 0.00 | Macrophage migration inhibitory factor |
| GRMZM2G049031 | 0.00 | eukaryotic                             |
| GRMZM2G049372 | 0.00 | Sugar/inositol transporter             |
| GRMZM2G049893 | 0.00 |                                        |
| GRMZM2G050485 | 0.00 | Pentatricopeptide repeat               |
| GRMZM2G050885 | 0.00 | Ankyrin                                |
| GRMZM2G051153 | 0.00 |                                        |
| GRMZM2G051355 | 0.00 | Aldo/keto reductase, conserved site    |
| GRMZM2G051403 | 0.00 |                                        |
| GRMZM2G051637 | 0.00 | Tyrosine protein kinase                |
| GRMZM2G051637 | 0.00 | Tyrosine protein kinase                |
| GRMZM2G051637 | 0.00 | Tyrosine protein kinase                |
| GRMZM2G051637 | 0.00 | Tyrosine protein kinase                |
| GRMZM2G052142 | 0.00 | Ubiquitin-conjugating enzyme/RWD-like  |
| GRMZM2G053079 | 0.00 | NERD                                   |
| GRMZM2G053554 | 0.00 | Glycoside hydrolase, family 27         |
| GRMZM2G053554 | 0.00 | Glycoside hydrolase, family 27         |
| GRMZM2G054805 | 0.00 |                                        |
| GRMZM2G055501 | 0.00 | Lipase, class 3                        |
| GRMZM2G055501 | 0.00 | Lipase, class 3                        |
| GRMZM2G055567 | 0.00 | RNA polymerase, N-terminal             |
| GRMZM2G055567 | 0.00 | RNA polymerase, N-terminal             |
| GRMZM2G055567 | 0.00 | RNA polymerase, N-terminal             |
| GRMZM2G055717 | 0.00 |                                        |
| GRMZM2G056231 | 0.00 | Histone-fold                           |
| GRMZM2G056442 | 0.00 | Leucine-rich repeat                    |
| GRMZM2G056488 | 0.00 |                                        |
| GRMZM2G056638 | 0.00 | BURP                                   |
| GRMZM2G056828 |      | Ribosomal protein S21e                 |
| GRMZM2G056828 |      | Ribosomal protein S21e                 |
| GRMZM2G056857 |      | Peptidase S1C, HrtA/DegP2/Q/S          |
| GRMZM2G056857 |      | Peptidase S1C, HrtA/DegP2/Q/S          |

|               |       |                                                   |
|---------------|-------|---------------------------------------------------|
| GRMZM2G056857 |       | Peptidase S1C, HrtA/DegP2/Q/S                     |
| GRMZM2G056914 | 0.00  | Protein of unknown function DUF569                |
| GRMZM2G057078 | 0.00  |                                                   |
| GRMZM2G057129 |       | Magnesium-dependent phosphatase-1                 |
| GRMZM2G057129 |       | Magnesium-dependent phosphatase-1                 |
| GRMZM2G057176 | 0.00  | WD40 repeat                                       |
| GRMZM2G057829 | 0.00  |                                                   |
| GRMZM2G058252 | 11.17 | Small nuclear ribonucleoprotein SmF               |
| GRMZM2G059012 | 0.00  | Tyrosine protein kinase                           |
| GRMZM2G059012 | 0.00  | Tyrosine protein kinase                           |
| GRMZM2G059012 | 0.00  | Tyrosine protein kinase                           |
| GRMZM2G059012 | 0.00  | Tyrosine protein kinase                           |
| GRMZM2G059012 | 0.00  | Tyrosine protein kinase                           |
| GRMZM2G059012 | 0.00  | Tyrosine protein kinase                           |
| GRMZM2G059012 | 0.00  | Tyrosine protein kinase                           |
| GRMZM2G059012 | 0.00  | Tyrosine protein kinase                           |
| GRMZM2G059637 | 0.00  | Phospholipid/glycerol acyltransferase             |
| GRMZM2G060322 | 0.00  |                                                   |
| GRMZM2G060511 |       | Ribosomal protein L37, mitochondrial              |
| GRMZM2G061303 | 0.00  | TGF-beta receptor, type I/II extracellular region |
| GRMZM2G061303 | 0.00  | TGF-beta receptor, type I/II extracellular region |
| GRMZM2G061398 | 0.00  | Protein of unknown function DUF632                |
| GRMZM2G061398 | 0.00  | Protein of unknown function DUF632                |
| GRMZM2G061398 | 0.00  | Protein of unknown function DUF632                |
| GRMZM2G061398 | 0.00  | Protein of unknown function DUF632                |
| GRMZM2G062481 | 11.01 | Phosphopantetheine-binding                        |
| GRMZM2G062854 | 0.00  | binding                                           |
| GRMZM2G063435 | 0.00  | Plant peroxidase                                  |
| GRMZM2G063468 | 0.00  | Sterile alpha motif SAM                           |
| GRMZM2G063802 | 15.68 | HR-like lesion-inducer                            |
| GRMZM2G064005 | 0.00  | WD40 repeat-like                                  |
| GRMZM2G064107 | 0.00  |                                                   |
| GRMZM2G064603 | 0.00  | Uridine kinase                                    |



|               |       |                                                |
|---------------|-------|------------------------------------------------|
| GRMZM2G064603 | 0.00  | Uridine kinase                                 |
| GRMZM2G064708 | 0.00  | Peptidase aspartic, active site                |
| GRMZM2G064708 | 0.00  | Peptidase aspartic, active site                |
| GRMZM2G064708 | 0.00  | Peptidase aspartic, active site                |
| GRMZM2G064708 | 0.00  | Peptidase aspartic, active site                |
| GRMZM2G064708 | 0.00  | Peptidase aspartic, active site                |
| GRMZM2G064708 | 0.00  | Peptidase aspartic, active site                |
| GRMZM2G064807 | 0.00  | Ribosomal protein L19                          |
| GRMZM2G064807 | 0.00  | Ribosomal protein L19                          |
| GRMZM2G064905 | 0.00  | Zinc finger, C2H2-type                         |
| GRMZM2G064905 | 0.00  | Zinc finger, C2H2-type                         |
| GRMZM2G064905 | 0.00  | Zinc finger, C2H2-type                         |
| GRMZM2G065012 | 0.00  | Antifreeze protein, type I                     |
| GRMZM2G065012 | 0.00  | Antifreeze protein, type I                     |
| GRMZM2G065012 | 0.00  | Antifreeze protein, type I                     |
| GRMZM2G065950 | 32.39 | TonB box, conserved site                       |
| GRMZM2G066448 | 0.00  | IQ calmodulin-binding region                   |
| GRMZM2G066469 | 0.00  | Peptidase S26A, signal peptidase I             |
| GRMZM2G066469 | 0.00  | Peptidase S26A, signal peptidase I             |
| GRMZM2G066469 | 0.00  | Peptidase S26A, signal peptidase I             |
| GRMZM2G066561 | 6.48  |                                                |
| GRMZM2G066612 | 8.56  | Thioredoxin-like fold                          |
| GRMZM2G067022 | 0.00  | Amino acid transporter, transmembrane          |
| GRMZM2G067303 |       | Ribosomal protein S10, eukaryotic/archaeal     |
| GRMZM2G067303 |       | Ribosomal protein S10, eukaryotic/archaeal     |
| GRMZM2G067707 | 9.75  | UcrQ                                           |
| GRMZM2G067707 | 9.75  | UcrQ                                           |
| GRMZM2G069668 | 0.00  | DNA-binding WRKY                               |
| GRMZM2G069668 | 0.00  | DNA-binding WRKY                               |
| GRMZM2G069668 | 0.00  | DNA-binding WRKY                               |
| GRMZM2G069976 | 0.00  | Protein of unknown function DUF1336            |
| GRMZM2G070011 | 0.00  | Proteinase inhibitor I29, cathepsin propeptide |
| GRMZM2G070011 | 0.00  | Proteinase inhibitor I29, cathepsin propeptide |
| GRMZM2G070011 | 0.00  | Proteinase inhibitor I29, cathepsin propeptide |
| GRMZM2G070305 | 0.00  | Peroxisome biogenesis factor 1, N-terminal     |
| GRMZM2G070305 | 0.00  | Peroxisome biogenesis factor 1, N-terminal     |
| GRMZM2G070305 | 0.00  | Peroxisome biogenesis factor 1, N-terminal     |
| GRMZM2G070305 | 0.00  | Peroxisome biogenesis factor 1, N-terminal     |
| GRMZM2G070305 | 0.00  | Peroxisome biogenesis factor 1, N-terminal     |

|               |       |                                                    |
|---------------|-------|----------------------------------------------------|
| GRMZM2G070305 | 0.00  | Peroxisome biogenesis factor 1, N-terminal         |
| GRMZM2G070305 | 0.00  | Peroxisome biogenesis factor 1, N-terminal         |
| GRMZM2G071172 | 0.00  |                                                    |
| GRMZM2G071360 | 0.00  | Protein of unknown function DUF1068                |
| GRMZM2G071450 | 18.65 | Plastocyanin                                       |
| GRMZM2G072146 | 0.00  | conserved site                                     |
| GRMZM2G072146 | 0.00  | conserved site                                     |
| GRMZM2G072146 | 0.00  | conserved site                                     |
| GRMZM2G072415 | 0.00  | Tim17/22                                           |
| GRMZM2G072415 | 0.00  | Tim17/22                                           |
| GRMZM2G072600 | 0.00  | Pentatricopeptide repeat                           |
| GRMZM2G073535 | 0.00  | Translation initiation factor SUI1                 |
| GRMZM2G073535 | 0.00  | Translation initiation factor SUI1                 |
| GRMZM2G073630 | 0.00  | Tropomyosin                                        |
| GRMZM2G073630 | 0.00  | Tropomyosin                                        |
| GRMZM2G073630 | 0.00  | Tropomyosin                                        |
| GRMZM2G073916 | 0.00  | FeS cluster insertion                              |
| GRMZM2G073916 | 0.00  | FeS cluster insertion                              |
| GRMZM2G073916 | 0.00  | FeS cluster insertion                              |
| GRMZM2G074208 | 0.00  | N-6 adenine-specific DNA methylase, conserved site |
| GRMZM2G074208 | 0.00  | N-6 adenine-specific DNA methylase, conserved site |
| GRMZM2G075003 | 0.00  | Zinc finger, Tim10/DDP-type                        |
| GRMZM2G075588 | 0.00  | Synaptobrevin                                      |
| GRMZM2G076272 | 0.00  | POX                                                |
| GRMZM2G076276 | 0.00  | Glycosyl transferase, family 8                     |
| GRMZM2G076537 | 0.00  | Polynucleotidyl transferase, Ribonuclease H fold   |
| GRMZM2G076537 | 0.00  | Polynucleotidyl transferase, Ribonuclease H fold   |
| GRMZM2G076665 | 0.00  | DNA-directed RNA polymerase, M/15 kDa subunit      |
| GRMZM2G076665 | 0.00  | DNA-directed RNA polymerase, M/15 kDa subunit      |
| GRMZM2G076665 | 0.00  | DNA-directed RNA polymerase, M/15 kDa subunit      |
| GRMZM2G077069 | 0.00  | Cyclin-like F-box                                  |
| GRMZM2G077655 | 0.00  | Tyrosine protein kinase                            |
| GRMZM2G077655 | 0.00  | Tyrosine protein kinase                            |
| GRMZM2G077655 | 0.00  | Tyrosine protein kinase                            |
| GRMZM2G077655 | 0.00  | Tyrosine protein kinase                            |
| GRMZM2G077811 | 0.00  | Thioesterase superfamily                           |
| GRMZM2G077991 |       | Ribosomal protein, zinc-binding                    |

|               |       |                                              |
|---------------|-------|----------------------------------------------|
| GRMZM2G077991 |       | Ribosomal protein, zinc-binding              |
| GRMZM2G078013 | 0.00  | Leucine-rich repeat                          |
| GRMZM2G078013 | 0.00  | Leucine-rich repeat                          |
| GRMZM2G078013 | 0.00  | Leucine-rich repeat                          |
| GRMZM2G079162 | 0.00  |                                              |
| GRMZM2G079805 | 0.00  | Cyclin-like F-box                            |
| GRMZM2G080530 | 0.00  | Leucine-rich repeat, typical subtype         |
| GRMZM2G081622 |       | Small GTP-binding protein                    |
| GRMZM2G081622 |       | Small GTP-binding protein                    |
| GRMZM2G081622 |       | Small GTP-binding protein                    |
| GRMZM2G081774 | 0.00  | Sugar/inositol transporter                   |
| GRMZM2G081774 | 0.00  | Sugar/inositol transporter                   |
| GRMZM2G081826 | 0.00  |                                              |
| GRMZM2G081953 | 0.00  | Protein of unknown function DUF566           |
| GRMZM2G082222 |       |                                              |
| GRMZM2G082696 | 0.00  | LisH dimerisation motif, subgroup            |
| GRMZM2G083497 |       | Ribosomal protein S8                         |
| GRMZM2G083497 |       | Ribosomal protein S8                         |
| GRMZM2G084389 | 0.00  | Tim17/22                                     |
| GRMZM2G084389 | 0.00  | Tim17/22                                     |
| GRMZM2G084429 | 16.98 |                                              |
| GRMZM2G084465 |       | Ribosomal protein S23, eukaryotic/archaeal   |
| GRMZM2G084465 |       | Ribosomal protein S23, eukaryotic/archaeal   |
| GRMZM2G086002 | 0.00  | YL1 nuclear, C-terminal                      |
| GRMZM2G086093 | 0.00  |                                              |
| GRMZM2G086669 | 0.00  | Ribosomal protein L35                        |
| GRMZM2G086669 | 0.00  | Ribosomal protein L35                        |
| GRMZM2G086935 | 0.00  |                                              |
| GRMZM2G087079 | 0.00  |                                              |
| GRMZM2G087245 |       | Lipase/lipoxygenase, PLAT/LH2                |
| GRMZM2G087395 | 0.00  | RNA-binding, CRM domain                      |
| GRMZM2G087824 | 25.14 |                                              |
| GRMZM2G088014 | 0.00  | WD40 repeat-like                             |
| GRMZM2G088669 |       | Heavy metal transport/detoxification protein |
| GRMZM2G088669 |       | Heavy metal transport/detoxification protein |
| GRMZM2G088880 |       | Ribosomal protein, zinc-binding              |
| GRMZM2G088880 |       | Ribosomal protein, zinc-binding              |
| GRMZM2G089454 | 0.00  | Small GTP-binding protein                    |
| GRMZM2G089454 | 0.00  | Small GTP-binding protein                    |
| GRMZM2G089454 | 0.00  | Small GTP-binding protein                    |
| GRMZM2G089673 | 0.00  | Protein of unknown function DUF1336          |
| GRMZM2G089688 | 0.00  | Rab5-interacting                             |
| GRMZM2G089959 | 0.00  | Pentatricopeptide repeat                     |

|               |        |                                             |
|---------------|--------|---------------------------------------------|
| GRMZM2G090576 | 0.00   | Tetratricopeptide TPR-4                     |
| GRMZM2G090872 |        | GroES-like                                  |
| GRMZM2G090872 |        | GroES-like                                  |
| GRMZM2G091276 | 0.00   | GH3 auxin-responsive promoter               |
| GRMZM2G091715 | 0.00   | Phosphopantetheine-binding                  |
| GRMZM2G092232 | 105.33 | Tropomyosin                                 |
| GRMZM2G092232 | 105.33 | Tropomyosin                                 |
| GRMZM2G092232 | 105.33 | Tropomyosin                                 |
| GRMZM2G092581 | 0.00   | Wilm's tumour protein region, bacterial     |
| GRMZM2G092581 | 0.00   | Wilm's tumour protein region, bacterial     |
| GRMZM2G092747 | 0.00   | Protein of unknown function DUF567          |
| GRMZM2G092888 | 0.00   | Protein phosphatase 2C-related              |
| GRMZM2G093325 | 0.00   |                                             |
| GRMZM2G093761 | 17.33  | MD-2-related lipid-recognition              |
| GRMZM2G094444 | 0.00   | Mitochondrial substrate/solute carrier      |
| GRMZM2G094444 | 0.00   | Mitochondrial substrate/solute carrier      |
| GRMZM2G094444 | 0.00   | Mitochondrial substrate/solute carrier      |
| GRMZM2G095302 | 0.00   | Protein kinase-like                         |
| GRMZM2G095511 | 0.00   | Ribosomal protein S10                       |
| GRMZM2G095511 | 0.00   | Ribosomal protein S10                       |
| GRMZM2G096286 | 0.00   | Terpenoid synthase                          |
| GRMZM2G096604 | 0.00   |                                             |
| GRMZM2G096695 |        | Protein of unknown function DUF861, cupin-3 |
| GRMZM2G096962 |        | Ribosomal protein L9 N-terminal-like        |
| GRMZM2G096962 |        | Ribosomal protein L9 N-terminal-like        |
| GRMZM2G097641 | 0.00   | Sucrose-phosphate phosphatase               |
| GRMZM2G097728 |        |                                             |
| GRMZM2G097929 | 0.00   |                                             |
| GRMZM2G098278 | 0.00   | Chemotaxis methyl-accepting receptor        |
| GRMZM2G098278 | 0.00   | Chemotaxis methyl-accepting receptor        |
| GRMZM2G098278 | 0.00   | Chemotaxis methyl-accepting receptor        |
| GRMZM2G098278 | 0.00   | Chemotaxis methyl-accepting receptor        |
| GRMZM2G098527 | 12.70  |                                             |

|               |       |                                                       |
|---------------|-------|-------------------------------------------------------|
| GRMZM2G098957 |       | Ribosomal protein L14b/L23e                           |
| GRMZM2G098957 |       | Ribosomal protein L14b/L23e                           |
| GRMZM2G099253 | 53.42 | RNA helicase, ATP-dependent, DEAD-box, conserved site |
| GRMZM2G099253 | 53.42 | RNA helicase, ATP-dependent, DEAD-box, conserved site |
| GRMZM2G099253 | 53.42 | RNA helicase, ATP-dependent, DEAD-box, conserved site |
| GRMZM2G099547 | 0.00  | Protein of unknown function DUF167                    |
| GRMZM2G100462 |       | Ribosomal S11, conserved site                         |
| GRMZM2G100462 |       | Ribosomal S11, conserved site                         |
| GRMZM2G101393 | 0.00  | Protein of unknown function DUF869, plant             |
| GRMZM2G101698 | 0.00  |                                                       |
| GRMZM2G101958 | 13.91 | amylase inhibitor                                     |
| GRMZM2G101958 | 13.91 | amylase inhibitor                                     |
| GRMZM2G102230 |       | Ribosomal protein L14b/L23e                           |
| GRMZM2G102230 |       | Ribosomal protein L14b/L23e                           |
| GRMZM2G102471 |       | Ubiquitin-conjugating enzyme/RWD-like                 |
| GRMZM2G102471 |       | Ubiquitin-conjugating enzyme/RWD-like                 |
| GRMZM2G102471 |       | Ubiquitin-conjugating enzyme/RWD-like                 |
| GRMZM2G102601 | 0.00  | terminal                                              |
| GRMZM2G102891 | 0.00  | Ribosomal protein P2                                  |
| GRMZM2G102891 | 0.00  | Ribosomal protein P2                                  |
| GRMZM2G103135 | 0.00  |                                                       |
| GRMZM2G103900 | 0.00  |                                                       |
| GRMZM2G104025 |       | Ribosomal protein L18e                                |
| GRMZM2G104025 |       | Ribosomal protein L18e                                |
| GRMZM2G104092 | 0.00  | Cellulose synthase                                    |
| GRMZM2G104092 | 0.00  | Cellulose synthase                                    |
| GRMZM2G104092 | 0.00  | Cellulose synthase                                    |
| GRMZM2G104357 | 0.00  | Tropomyosin                                           |
| GRMZM2G104456 | 0.00  |                                                       |
| GRMZM2G104542 | 0.00  | TGF-beta receptor, type I/II extracellular region     |
| GRMZM2G104542 | 0.00  | TGF-beta receptor, type I/II extracellular region     |
| GRMZM2G104542 | 0.00  | TGF-beta receptor, type I/II extracellular region     |
| GRMZM2G104542 | 0.00  | TGF-beta receptor, type I/II extracellular region     |
| GRMZM2G104732 | 0.00  | WD40 repeat-like                                      |
| GRMZM2G105641 | 0.00  | Plant regulator RWP-RK                                |
| GRMZM2G106683 | 0.00  | Peptidase M14, carboxypeptidase A                     |
| GRMZM2G106683 | 0.00  | Peptidase M14, carboxypeptidase A                     |
| GRMZM2G106683 | 0.00  | Peptidase M14, carboxypeptidase A                     |
| GRMZM2G106683 | 0.00  | Peptidase M14, carboxypeptidase A                     |

|               |       |                                                   |
|---------------|-------|---------------------------------------------------|
| GRMZM2G107540 |       | Histone-fold                                      |
| GRMZM2G107595 | 0.00  | CCT domain                                        |
| GRMZM2G107745 | 16.93 | RNA recognition motif, RNP-1                      |
| GRMZM2G107745 | 16.93 | RNA recognition motif, RNP-1                      |
| GRMZM2G107987 | 0.00  | Helicase-like, DEXD box c2 type                   |
| GRMZM2G107987 | 0.00  | Helicase-like, DEXD box c2 type                   |
| GRMZM2G107987 | 0.00  | Helicase-like, DEXD box c2 type                   |
| GRMZM2G107987 | 0.00  | Helicase-like, DEXD box c2 type                   |
| GRMZM2G107987 | 0.00  | Helicase-like, DEXD box c2 type                   |
| GRMZM2G108027 | 0.00  |                                                   |
| GRMZM2G108118 | 0.00  | HSP20-like chaperone                              |
| GRMZM2G108207 | 0.00  | Plant peroxidase                                  |
| GRMZM2G108474 |       | Translationally controlled tumour-associated TCTP |
| GRMZM2G108976 | 0.00  | ARP2/3 complex 16 kDa subunit (p16-Arc)           |
| GRMZM2G109429 | 0.00  | Sep15/SelM redox                                  |
| GRMZM2G109793 | 0.00  |                                                   |
| GRMZM2G110023 |       | Clp, N-terminal                                   |
| GRMZM2G110023 |       | Clp, N-terminal                                   |
| GRMZM2G110080 | 0.00  | Recoverin                                         |
| GRMZM2G110483 | 0.00  | Protease-activated receptor 4                     |
| GRMZM2G110483 | 0.00  | Protease-activated receptor 4                     |
| GRMZM2G110483 | 0.00  | Protease-activated receptor 4                     |
| GRMZM2G110483 | 0.00  | Protease-activated receptor 4                     |
| GRMZM2G110483 | 0.00  | Protease-activated receptor 4                     |
| GRMZM2G110483 | 0.00  | Protease-activated receptor 4                     |
| GRMZM2G110897 | 0.00  | Orphan nuclear receptor, NOR1 type                |
| GRMZM2G110897 | 0.00  | Orphan nuclear receptor, NOR1 type                |
| GRMZM2G110897 | 0.00  | Orphan nuclear receptor, NOR1 type                |
| GRMZM2G110897 | 0.00  | Orphan nuclear receptor, NOR1 type                |
| GRMZM2G110897 | 0.00  | Orphan nuclear receptor, NOR1 type                |
| GRMZM2G111980 | 0.00  |                                                   |
| GRMZM2G112050 |       | S15/NS1, RNA-binding                              |
| GRMZM2G112050 |       | S15/NS1, RNA-binding                              |
| GRMZM2G113414 | 0.00  | Translation initiation factor SUI1                |
| GRMZM2G113414 | 0.00  | Translation initiation factor SUI1                |
| GRMZM2G113624 | 0.00  | Zinc finger, TTF-type                             |
| GRMZM2G113624 | 0.00  | Zinc finger, TTF-type                             |
| GRMZM2G114459 | 0.00  |                                                   |
| GRMZM2G114906 | 0.00  | Protein of unknown function DUF863, plant         |
| GRMZM2G115162 | 0.00  | BTB/POZ-like                                      |

|               |       |                                                            |
|---------------|-------|------------------------------------------------------------|
| GRMZM2G115198 | 0.00  | Site-specific DNA-methyltransferase (cytosine-N4-specific) |
| GRMZM2G115198 | 0.00  | Site-specific DNA-methyltransferase (cytosine-N4-specific) |
| GRMZM2G115198 | 0.00  | Site-specific DNA-methyltransferase (cytosine-N4-specific) |
| GRMZM2G115198 | 0.00  | Site-specific DNA-methyltransferase (cytosine-N4-specific) |
| GRMZM2G115198 | 0.00  | Site-specific DNA-methyltransferase (cytosine-N4-specific) |
| GRMZM2G115198 | 0.00  | Site-specific DNA-methyltransferase (cytosine-N4-specific) |
| GRMZM2G116362 | 0.00  | Zinc finger, RING-type, conserved site                     |
| GRMZM2G116362 | 0.00  | Zinc finger, RING-type, conserved site                     |
| GRMZM2G117491 | 0.00  | Protein of unknown function DUF250                         |
| GRMZM2G117558 | 0.00  |                                                            |
| GRMZM2G117700 | 0.00  | like                                                       |
| GRMZM2G117700 | 0.00  | like                                                       |
| GRMZM2G118113 | 0.00  | RNA polymerases, N/8 Kd subunits                           |
| GRMZM2G118113 | 0.00  | RNA polymerases, N/8 Kd subunits                           |
| GRMZM2G118208 | 0.00  | Mitochondrial substrate/solute carrier                     |
| GRMZM2G118208 | 0.00  | Mitochondrial substrate/solute carrier                     |
| GRMZM2G118714 | 0.00  | Tropomyosin                                                |
| GRMZM2G119127 | 0.00  |                                                            |
| GRMZM2G119241 | 0.00  | Alpha-1,4-glucan-protein synthase, UDP-forming             |
| GRMZM2G119241 | 0.00  | Alpha-1,4-glucan-protein synthase, UDP-forming             |
| GRMZM2G119241 | 0.00  | Alpha-1,4-glucan-protein synthase, UDP-forming             |
| GRMZM2G119339 | 0.00  |                                                            |
| GRMZM2G119571 | 0.00  |                                                            |
| GRMZM2G119809 |       | Treacher Collins Syndrome, treacle-like                    |
| GRMZM2G119809 |       | Treacher Collins Syndrome, treacle-like                    |
| GRMZM2G119950 | 0.00  |                                                            |
| GRMZM2G119998 | 0.00  |                                                            |
| GRMZM2G120421 | 0.00  |                                                            |
| GRMZM2G122064 | 0.00  | RabGAP/TBC                                                 |
| GRMZM2G122064 | 0.00  | RabGAP/TBC                                                 |
| GRMZM2G122276 | 0.00  | Glycine rich                                               |
| GRMZM2G122793 | 0.00  | Ferredoxin thioredoxin reductase, beta subunit             |
| GRMZM2G123089 | 0.00  | Rad51, C-terminal                                          |
| GRMZM2G124887 | 0.00  | Heat shock protein DnaJ, cysteine-rich region              |
| GRMZM2G124887 | 0.00  | Heat shock protein DnaJ, cysteine-rich region              |
| GRMZM2G125233 | 0.00  | Glycoside hydrolase-type carbohydrate-binding              |
| GRMZM2G125233 | 0.00  | Glycoside hydrolase-type carbohydrate-binding              |
| GRMZM2G125233 | 0.00  | Glycoside hydrolase-type carbohydrate-binding              |
| GRMZM2G125304 | 0.00  |                                                            |
| GRMZM2G125704 | 0.00  |                                                            |
| GRMZM2G125784 | 12.82 |                                                            |
| GRMZM2G125838 | 0.00  | Recoverin                                                  |
| GRMZM2G125893 |       | Nucleoside diphosphate kinase, core                        |

|               |       |                                             |
|---------------|-------|---------------------------------------------|
| GRMZM2G125893 |       | Nucleoside diphosphate kinase, core         |
| GRMZM2G125893 |       | Nucleoside diphosphate kinase, core         |
| GRMZM2G126920 | 0.00  | Cyclin-like F-box                           |
| GRMZM2G127386 | 12.23 |                                             |
| GRMZM2G127431 | 0.00  | Protein of unknown function DUF623, plant   |
| GRMZM2G127490 | 0.00  | SANT, DNA-binding                           |
| GRMZM2G127893 | 0.00  |                                             |
| GRMZM2G128176 | 0.00  | Zinc finger, PHD-type                       |
| GRMZM2G128176 | 0.00  | Zinc finger, PHD-type                       |
| GRMZM2G128176 | 0.00  | Zinc finger, PHD-type                       |
| GRMZM2G128176 | 0.00  | Zinc finger, PHD-type                       |
| GRMZM2G128485 | 0.00  |                                             |
| GRMZM2G129058 | 0.00  | Tyrosine protein kinase                     |
| GRMZM2G129058 | 0.00  | Tyrosine protein kinase                     |
| GRMZM2G129058 | 0.00  | Tyrosine protein kinase                     |
| GRMZM2G129058 | 0.00  | Tyrosine protein kinase                     |
| GRMZM2G129058 | 0.00  | Tyrosine protein kinase                     |
| GRMZM2G129246 | 0.00  | FMN-dependent dehydrogenase                 |
| GRMZM2G129246 | 0.00  | FMN-dependent dehydrogenase                 |
| GRMZM2G129246 | 0.00  | FMN-dependent dehydrogenase                 |
| GRMZM2G129457 | 0.00  | TonB box, conserved site                    |
| GRMZM2G130085 | 0.00  | Peptidase, trypsin-like serine and cysteine |
| GRMZM2G130085 | 0.00  | Peptidase, trypsin-like serine and cysteine |
| GRMZM2G130085 | 0.00  | Peptidase, trypsin-like serine and cysteine |
| GRMZM2G130085 | 0.00  | Peptidase, trypsin-like serine and cysteine |
| GRMZM2G130287 | 0.00  |                                             |
| GRMZM2G130739 | 0.00  |                                             |
| GRMZM2G130746 |       | Histone-fold                                |
| GRMZM2G130800 | 0.00  | Glycosyltransferase AER61, uncharacterized  |
| GRMZM2G132000 | 9.91  | Ubiquitin                                   |
| GRMZM2G133016 | 0.00  | Sel1-like                                   |
| GRMZM2G133552 | 0.00  | Zinc finger, C2H2-type                      |
| GRMZM2G133972 | 0.00  | Homeodomain-like                            |
| GRMZM2G133972 | 0.00  | Homeodomain-like                            |
| GRMZM2G133972 | 0.00  | Homeodomain-like                            |
| GRMZM2G134230 | 0.00  |                                             |
| GRMZM2G134332 | 0.00  | Tyrosine protein kinase                     |
| GRMZM2G134332 | 0.00  | Tyrosine protein kinase                     |
| GRMZM2G134332 | 0.00  | Tyrosine protein kinase                     |
| GRMZM2G134613 |       | Light chain 3 (LC3)                         |
| GRMZM2G135688 | 0.00  | Zinc finger, HIT-type                       |
| GRMZM2G136237 | 18.34 |                                             |
| GRMZM2G136262 | 17.49 | Phosphopantetheine-binding                  |



|               |       |                                         |
|---------------|-------|-----------------------------------------|
| GRMZM2G136262 | 17.49 | Phosphopantetheine-binding              |
| GRMZM2G136262 | 17.49 | Phosphopantetheine-binding              |
| GRMZM2G136262 | 17.49 | Phosphopantetheine-binding              |
| GRMZM2G136268 | 0.00  |                                         |
| GRMZM2G136427 | 0.00  | Wilm's tumour protein region, bacterial |
| GRMZM2G137387 | 0.00  | Transcription factor, MADS-box          |
| GRMZM2G137387 | 0.00  | Transcription factor, MADS-box          |
| GRMZM2G137387 | 0.00  | Transcription factor, MADS-box          |
| GRMZM2G137495 | 0.00  | HSP40/DnaJ peptide-binding              |
| GRMZM2G137495 | 0.00  | HSP40/DnaJ peptide-binding              |
| GRMZM2G137561 |       | Complex 1 LYR protein                   |
| GRMZM2G138407 | 0.00  | Zinc finger, TFIIIS-type                |
| GRMZM2G138407 | 0.00  | Zinc finger, TFIIIS-type                |
| GRMZM2G138407 | 0.00  | Zinc finger, TFIIIS-type                |
| GRMZM2G138407 | 0.00  | Zinc finger, TFIIIS-type                |
| GRMZM2G138407 | 0.00  | Zinc finger, TFIIIS-type                |
| GRMZM2G138407 | 0.00  | Zinc finger, TFIIIS-type                |
| GRMZM2G138410 | 30.73 | UDP-glucose 4-epimerase                 |
| GRMZM2G138410 | 30.73 | UDP-glucose 4-epimerase                 |
| GRMZM2G138410 | 30.73 | UDP-glucose 4-epimerase                 |
| GRMZM2G138943 | 0.00  | Excinuclease ABC, C subunit, N-terminal |
| GRMZM2G138943 | 0.00  | Excinuclease ABC, C subunit, N-terminal |
| GRMZM2G138943 | 0.00  | Excinuclease ABC, C subunit, N-terminal |
| GRMZM2G139815 | 0.00  | DNA-binding WRKY                        |
| GRMZM2G139815 | 0.00  | DNA-binding WRKY                        |
| GRMZM2G139815 | 0.00  | DNA-binding WRKY                        |
| GRMZM2G140443 | 0.00  |                                         |
| GRMZM2G140559 | 0.00  |                                         |
| GRMZM2G140590 | 0.00  | Tyrosine protein kinase                 |
| GRMZM2G140590 | 0.00  | Tyrosine protein kinase                 |
| GRMZM2G140590 | 0.00  | Tyrosine protein kinase                 |
| GRMZM2G140590 | 0.00  | Tyrosine protein kinase                 |
| GRMZM2G141322 | 0.00  | Ribonuclease T2, active site            |
| GRMZM2G141322 | 0.00  | Ribonuclease T2, active site            |
| GRMZM2G142097 | 20.78 | Ribosomal protein L18/L5                |
| GRMZM2G142097 | 20.78 | Ribosomal protein L18/L5                |
| GRMZM2G142507 | 0.00  |                                         |
| GRMZM2G142553 | 0.00  |                                         |
| GRMZM2G143512 | 0.00  | Mercury scavenger protein               |
| GRMZM2G143512 | 0.00  | Mercury scavenger protein               |
| GRMZM2G143512 | 0.00  | Mercury scavenger protein               |
| GRMZM2G143512 | 0.00  | Mercury scavenger protein               |
| GRMZM2G143512 | 0.00  | Mercury scavenger protein               |

|               |       |                                                      |
|---------------|-------|------------------------------------------------------|
| GRMZM2G143512 | 0.00  | Mercury scavenger protein                            |
| GRMZM2G143512 | 0.00  | Mercury scavenger protein                            |
| GRMZM2G143777 | 0.00  |                                                      |
| GRMZM2G144189 | 0.00  |                                                      |
| GRMZM2G144403 | 0.00  | C2 calcium-dependent membrane targeting              |
| GRMZM2G144451 | 0.00  |                                                      |
| GRMZM2G144594 | 0.00  |                                                      |
| GRMZM2G144782 | 0.00  | Zinc finger, RING-type                               |
| GRMZM2G144782 | 0.00  | Zinc finger, RING-type                               |
| GRMZM2G144818 | 0.00  | Protein of unknown function DUF498                   |
| GRMZM2G145101 | 0.00  | Carbonic anhydrase, prokaryotic-like, conserved site |
| GRMZM2G145101 | 0.00  | Carbonic anhydrase, prokaryotic-like, conserved site |
| GRMZM2G145504 | 0.00  | Pentatricopeptide repeat                             |
| GRMZM2G146173 | 0.00  | Osteopontin                                          |
| GRMZM2G146720 | 0.00  | EPS15 homology (EH)                                  |
| GRMZM2G146862 | 89.79 | Tetratricopeptide TPR-1                              |
| GRMZM2G147589 | 0.00  |                                                      |
| GRMZM2G147809 | 0.00  | Zinc finger, RING-type, conserved site               |
| GRMZM2G147809 | 0.00  | Zinc finger, RING-type, conserved site               |
| GRMZM2G148030 | 0.00  |                                                      |
| GRMZM2G148711 | 0.00  | Peptidase C48, SUMO/Sentrin/Ubl1                     |
| GRMZM2G148711 | 0.00  | Peptidase C48, SUMO/Sentrin/Ubl1                     |
| GRMZM2G148711 | 0.00  | Peptidase C48, SUMO/Sentrin/Ubl1                     |
| GRMZM2G148913 | 0.00  | Lipase, class 3                                      |
| GRMZM2G148913 | 0.00  | Lipase, class 3                                      |
| GRMZM2G149135 | 0.00  |                                                      |
| GRMZM2G150337 | 0.00  | Ionotropic glutamate-like receptor, plant            |
| GRMZM2G150337 | 0.00  | Ionotropic glutamate-like receptor, plant            |
| GRMZM2G150337 | 0.00  | Ionotropic glutamate-like receptor, plant            |
| GRMZM2G150337 | 0.00  | Ionotropic glutamate-like receptor, plant            |
| GRMZM2G150337 | 0.00  | Ionotropic glutamate-like receptor, plant            |
| GRMZM2G150780 | 0.00  | Plant peroxidase                                     |
| GRMZM2G150915 | 0.00  |                                                      |
| GRMZM2G150984 | 0.00  | Kinesin, motor region                                |
| GRMZM2G150984 | 0.00  | Kinesin, motor region                                |
| GRMZM2G150984 | 0.00  | Kinesin, motor region                                |
| GRMZM2G151230 | 0.00  | Protein of unknown function Cys-rich                 |
| GRMZM2G151651 | 0.00  | Transmembrane protein 97, predicted                  |
| GRMZM2G151706 | 0.00  | DNA-directed RNA polymerase, RBP11-like              |
| GRMZM2G151706 | 0.00  | DNA-directed RNA polymerase, RBP11-like              |



|               |       |                                                   |
|---------------|-------|---------------------------------------------------|
| GRMZM2G158305 | 0.00  |                                                   |
| GRMZM2G159049 | 0.00  |                                                   |
| GRMZM2G159218 | 12.07 |                                                   |
| GRMZM2G160444 | 0.00  | Tropomyosin                                       |
| GRMZM2G161072 | 0.00  |                                                   |
| GRMZM2G161087 | 50.87 | ATP-binding region, ATPase-like                   |
| GRMZM2G161491 | 0.00  |                                                   |
| GRMZM2G161846 | 0.00  | Heavy metal transport/detoxification protein      |
| GRMZM2G161846 | 0.00  | Heavy metal transport/detoxification protein      |
| GRMZM2G162052 | 0.00  | Cecropin                                          |
| GRMZM2G162251 | 0.00  |                                                   |
| GRMZM2G162261 | 13.78 | Polynucleotidyl transferase, Ribonuclease H fold  |
| GRMZM2G162261 | 13.78 | Polynucleotidyl transferase, Ribonuclease H fold  |
| GRMZM2G162261 | 13.78 | Polynucleotidyl transferase, Ribonuclease H fold  |
| GRMZM2G162316 | 0.00  | Mannose-6-phosphate receptor, binding             |
| GRMZM2G162531 | 0.00  | Tyrosine protein kinase                           |
| GRMZM2G162531 | 0.00  | Tyrosine protein kinase                           |
| GRMZM2G162531 | 0.00  | Tyrosine protein kinase                           |
| GRMZM2G162531 | 0.00  | Tyrosine protein kinase                           |
| GRMZM2G163291 | 0.00  | Histone H1/H5                                     |
| GRMZM2G163296 |       | Protein of unknown function DUF1068               |
| GRMZM2G163996 |       | FeS cluster insertion, C-terminal, conserved site |
| GRMZM2G163996 |       | FeS cluster insertion, C-terminal, conserved site |
| GRMZM2G163996 |       | FeS cluster insertion, C-terminal, conserved site |
| GRMZM2G164358 | 0.00  | Zinc finger, RING-type                            |
| GRMZM2G164358 | 0.00  | Zinc finger, RING-type                            |
| GRMZM2G164854 | 0.00  | WD40 repeat-like                                  |
| GRMZM2G165511 | 0.00  | Ubiquitin-conjugating enzyme/RWD-like             |
| GRMZM2G165511 | 0.00  | Ubiquitin-conjugating enzyme/RWD-like             |
| GRMZM2G165511 | 0.00  | Ubiquitin-conjugating enzyme/RWD-like             |
| GRMZM2G165746 | 0.00  | Mitochondrial substrate/solute carrier            |
| GRMZM2G165746 | 0.00  | Mitochondrial substrate/solute carrier            |
| GRMZM2G165746 | 0.00  | Mitochondrial substrate/solute carrier            |
| GRMZM2G166548 | 0.00  | Protein of unknown function DUF506, plant         |
| GRMZM2G166548 | 0.00  | Protein of unknown function DUF506, plant         |
| GRMZM2G166548 | 0.00  | Protein of unknown function DUF506, plant         |
| GRMZM2G166925 | 0.00  | Sugar/inositol transporter                        |
| GRMZM2G166925 | 0.00  | Sugar/inositol transporter                        |
| GRMZM2G167431 | 0.00  | Short-chain dehydrogenase/reductase SDR           |
| GRMZM2G167431 | 0.00  | Short-chain dehydrogenase/reductase SDR           |

|               |       |                                                 |
|---------------|-------|-------------------------------------------------|
| GRMZM2G167431 | 0.00  | Short-chain dehydrogenase/reductase SDR         |
| GRMZM2G167898 | 0.00  | C2 calcium-dependent membrane targeting         |
| GRMZM2G168171 | 0.00  |                                                 |
| GRMZM2G169785 | 0.00  |                                                 |
| GRMZM2G169890 |       | Superoxide dismutase, copper/zinc, binding site |
| GRMZM2G169998 | 0.00  | RNA recognition motif, RNP-1                    |
| GRMZM2G170008 | 21.59 | Thioredoxin-like subdomain                      |
| GRMZM2G170008 | 21.59 | Thioredoxin-like subdomain                      |
| GRMZM2G170008 | 21.59 | Thioredoxin-like subdomain                      |
| GRMZM2G170532 | 0.00  |                                                 |
| GRMZM2G170727 | 0.00  | Protein of unknown function DUF59               |
| GRMZM2G171254 |       |                                                 |
| GRMZM2G171328 | 0.00  | Region of unknown function DM13, Skeletor       |
| GRMZM2G171328 | 0.00  | Region of unknown function DM13, Skeletor       |
| GRMZM2G171328 | 0.00  | Region of unknown function DM13, Skeletor       |
| GRMZM2G171501 | 0.00  | like                                            |
| GRMZM2G172204 | 0.00  | Mannose-binding lectin                          |
| GRMZM2G173162 | 0.00  |                                                 |
| GRMZM2G174669 | 0.00  | rRNA adenine dimethylase                        |
| GRMZM2G174669 | 0.00  | rRNA adenine dimethylase                        |
| GRMZM2G174984 | 15.35 | Photosystem II protein PsbR                     |
| GRMZM2G174984 | 15.35 | Photosystem II protein PsbR                     |
| GRMZM2G175038 | 0.00  | Major intrinsic protein                         |
| GRMZM2G175038 | 0.00  | Major intrinsic protein                         |
| GRMZM2G176820 |       | Ribosomal protein L11, bacterial-type           |
| GRMZM2G176820 |       | Ribosomal protein L11, bacterial-type           |
| GRMZM2G177508 | 0.00  |                                                 |
| GRMZM2G177654 | 0.00  | Ribosomal protein S17                           |
| GRMZM2G177654 | 0.00  | Ribosomal protein S17                           |
| GRMZM2G177726 | 0.00  | Tyrosine protein kinase                         |
| GRMZM2G177726 | 0.00  | Tyrosine protein kinase                         |
| GRMZM2G177726 | 0.00  | Tyrosine protein kinase                         |
| GRMZM2G177914 | 0.00  | Longin-like                                     |
| GRMZM2G177914 | 0.00  | Longin-like                                     |
| GRMZM2G177914 | 0.00  | Longin-like                                     |
| GRMZM2G177937 | 22.82 | Thioredoxin-like subdomain                      |

|               |       |                                                          |
|---------------|-------|----------------------------------------------------------|
| GRMZM2G178455 |       |                                                          |
| GRMZM2G178747 | 0.00  | Mitochondrial substrate/solute carrier                   |
| GRMZM2G178747 | 0.00  | Mitochondrial substrate/solute carrier                   |
| GRMZM2G179281 | 0.00  |                                                          |
| GRMZM2G179313 | 0.00  |                                                          |
| GRMZM2G179351 | 0.00  | Synaptotagmin                                            |
| GRMZM2G179351 | 0.00  | Synaptotagmin                                            |
| GRMZM2G180452 | 0.00  | Helix-loop-helix DNA-binding                             |
| GRMZM2G180452 | 0.00  | Helix-loop-helix DNA-binding                             |
| GRMZM2G180555 | 0.00  | Tyrosine protein kinase                                  |
| GRMZM2G180555 | 0.00  | Tyrosine protein kinase                                  |
| GRMZM2G180555 | 0.00  | Tyrosine protein kinase                                  |
| GRMZM2G180555 | 0.00  | Tyrosine protein kinase                                  |
| GRMZM2G180555 | 0.00  | Tyrosine protein kinase                                  |
| GRMZM2G180555 | 0.00  | Tyrosine protein kinase                                  |
| GRMZM2G181021 | 0.00  |                                                          |
| GRMZM2G181258 | 21.76 | Thioredoxin-like subdomain                               |
| GRMZM2G181258 | 21.76 | Thioredoxin-like subdomain                               |
| GRMZM2G181258 | 21.76 | Thioredoxin-like subdomain                               |
| GRMZM2G181336 |       | Ribosomal protein L35Ae, conserved site                  |
| GRMZM2G181336 |       | Ribosomal protein L35Ae, conserved site                  |
| GRMZM2G300692 | 0.00  | Glycosyl transferase, family 8                           |
| GRMZM2G300709 | 0.00  | Kinesin, motor region                                    |
| GRMZM2G300709 | 0.00  | Kinesin, motor region                                    |
| GRMZM2G300709 | 0.00  | Kinesin, motor region                                    |
| GRMZM2G301271 | 0.00  | Amino acid/polyamine transporter I                       |
| GRMZM2G301271 | 0.00  | Amino acid/polyamine transporter I                       |
| GRMZM2G301516 | 0.00  |                                                          |
| GRMZM2G301647 | 0.00  | Tyrosine protein kinase                                  |
| GRMZM2G301647 | 0.00  | Tyrosine protein kinase                                  |
| GRMZM2G301647 | 0.00  | Tyrosine protein kinase                                  |
| GRMZM2G301961 | 0.00  |                                                          |
| GRMZM2G302673 | 0.00  | GPCR, family 3, gamma-aminobutyric acid receptor, type B |
| GRMZM2G302673 | 0.00  | GPCR, family 3, gamma-aminobutyric acid receptor, type B |
| GRMZM2G303118 | 0.00  | DEAD-like helicase, N-terminal                           |
| GRMZM2G308615 | 0.00  | Protein phosphatase 2C-related                           |
| GRMZM2G308615 | 0.00  | Protein phosphatase 2C-related                           |
| GRMZM2G308615 | 0.00  | Protein phosphatase 2C-related                           |
| GRMZM2G308615 | 0.00  | Protein phosphatase 2C-related                           |
| GRMZM2G308615 | 0.00  | Protein phosphatase 2C-related                           |
| GRMZM2G308615 | 0.00  | Protein phosphatase 2C-related                           |
| GRMZM2G309512 | 0.00  | Tyrosine protein kinase                                  |
| GRMZM2G309512 | 0.00  | Tyrosine protein kinase                                  |

|               |       |                                                         |
|---------------|-------|---------------------------------------------------------|
| GRMZM2G309512 | 0.00  | Tyrosine protein kinase                                 |
| GRMZM2G309512 | 0.00  | Tyrosine protein kinase                                 |
| GRMZM2G310739 | 0.00  | X8                                                      |
| GRMZM2G310739 | 0.00  | X8                                                      |
| GRMZM2G310840 | 0.00  | Tyrosine protein kinase                                 |
| GRMZM2G310840 | 0.00  | Tyrosine protein kinase                                 |
| GRMZM2G310840 | 0.00  | Tyrosine protein kinase                                 |
| GRMZM2G310840 | 0.00  | Tyrosine protein kinase                                 |
| GRMZM2G312438 | 0.00  |                                                         |
| GRMZM2G315806 | 0.00  | subunit RsuA, conserved site                            |
| GRMZM2G315806 | 0.00  | subunit RsuA, conserved site                            |
| GRMZM2G315806 | 0.00  | subunit RsuA, conserved site                            |
| GRMZM2G315806 | 0.00  | subunit RsuA, conserved site                            |
| GRMZM2G315806 | 0.00  | subunit RsuA, conserved site                            |
| GRMZM2G315806 | 0.00  | subunit RsuA, conserved site                            |
| GRMZM2G316665 |       | Tropomyosin                                             |
| GRMZM2G317450 | 0.00  | Helix-loop-helix DNA-binding                            |
| GRMZM2G317450 | 0.00  | Helix-loop-helix DNA-binding                            |
| GRMZM2G319187 | 0.00  | Signal transduction response regulator, receiver region |
| GRMZM2G319187 | 0.00  | Signal transduction response regulator, receiver region |
| GRMZM2G319187 | 0.00  | Signal transduction response regulator, receiver region |
| GRMZM2G319187 | 0.00  | Signal transduction response regulator, receiver region |
| GRMZM2G319573 | 0.00  | DNA/RNA helicase, DEAD/DEAH box type, N-terminal        |
| GRMZM2G319573 | 0.00  | DNA/RNA helicase, DEAD/DEAH box type, N-terminal        |
| GRMZM2G319573 | 0.00  | DNA/RNA helicase, DEAD/DEAH box type, N-terminal        |
| GRMZM2G319573 | 0.00  | DNA/RNA helicase, DEAD/DEAH box type, N-terminal        |
| GRMZM2G322661 | 0.00  | RNA polymerase Rbp10                                    |
| GRMZM2G322661 | 0.00  | RNA polymerase Rbp10                                    |
| GRMZM2G322661 | 0.00  | RNA polymerase Rbp10                                    |
| GRMZM2G325019 | 0.00  | Pentatricopeptide repeat                                |
| GRMZM2G325019 | 0.00  | Pentatricopeptide repeat                                |
| GRMZM2G325749 | 14.59 | Ribosomal protein L18/L5                                |
| GRMZM2G325749 | 14.59 | Ribosomal protein L18/L5                                |
| GRMZM2G326222 | 0.00  | Plant peroxidase                                        |
| GRMZM2G329159 | 0.00  | Zinc finger, C2H2-type                                  |
| GRMZM2G329325 | 0.00  | Peptidase S54, rhomboid                                 |
| GRMZM2G330424 | 14.79 |                                                         |
| GRMZM2G335618 | 0.00  | Thioredoxin-like fold                                   |
| GRMZM2G337815 | 0.00  | Ribosomal protein S25                                   |
| GRMZM2G339503 | 9.95  | Mitochondrial import translocase, subunit Tom7          |

|               |       |                                                         |
|---------------|-------|---------------------------------------------------------|
| GRMZM2G339503 | 9.95  | Mitochondrial import translocase, subunit Tom7          |
| GRMZM2G339503 | 9.95  | Mitochondrial import translocase, subunit Tom7          |
| GRMZM2G340076 | 0.00  | Tyrosine protein kinase                                 |
| GRMZM2G340076 | 0.00  | Tyrosine protein kinase                                 |
| GRMZM2G340076 | 0.00  | Tyrosine protein kinase                                 |
| GRMZM2G341959 | 0.00  | Sulfotransferase                                        |
| GRMZM2G342920 | 0.00  |                                                         |
| GRMZM2G348480 | 0.00  |                                                         |
| GRMZM2G348977 | 0.00  |                                                         |
| GRMZM2G349407 | 0.00  |                                                         |
| GRMZM2G352415 | 0.00  | Water Stress and Hypersensitive response                |
| GRMZM2G352415 | 0.00  | Water Stress and Hypersensitive response                |
| GRMZM2G353147 | 0.00  | TonB box, conserved site                                |
| GRMZM2G353708 | 0.00  | Tyrosine protein kinase                                 |
| GRMZM2G353708 | 0.00  | Tyrosine protein kinase                                 |
| GRMZM2G353708 | 0.00  | Tyrosine protein kinase                                 |
| GRMZM2G353708 | 0.00  | Tyrosine protein kinase                                 |
| GRMZM2G353708 | 0.00  | Tyrosine protein kinase                                 |
| GRMZM2G353708 | 0.00  | Tyrosine protein kinase                                 |
| GRMZM2G355906 | 0.00  | Pyridoxal phosphate-dependent transferase, major region |
| GRMZM2G355906 | 0.00  | Pyridoxal phosphate-dependent transferase, major region |
| GRMZM2G355906 | 0.00  | Pyridoxal phosphate-dependent transferase, major region |
| GRMZM2G356459 | 0.00  | Nucleic acid-binding, OB-fold-like                      |
| GRMZM2G356459 | 0.00  | Nucleic acid-binding, OB-fold-like                      |
| GRMZM2G356459 | 0.00  | Nucleic acid-binding, OB-fold-like                      |
| GRMZM2G356459 | 0.00  | Nucleic acid-binding, OB-fold-like                      |
| GRMZM2G356523 | 0.00  | Polynucleotidyl transferase, Ribonuclease H fold        |
| GRMZM2G356523 | 0.00  | Polynucleotidyl transferase, Ribonuclease H fold        |
| GRMZM2G356523 | 0.00  | Polynucleotidyl transferase, Ribonuclease H fold        |
| GRMZM2G356839 | 0.00  |                                                         |
| GRMZM2G357683 | 0.00  | Peptidase S16, Lon protease, C-terminal region          |
| GRMZM2G357683 | 0.00  | Peptidase S16, Lon protease, C-terminal region          |
| GRMZM2G357683 | 0.00  | Peptidase S16, Lon protease, C-terminal region          |
| GRMZM2G357683 | 0.00  | Peptidase S16, Lon protease, C-terminal region          |
| GRMZM2G361074 | 14.29 | Zinc finger, RING-type                                  |
| GRMZM2G361074 | 14.29 | Zinc finger, RING-type                                  |
| GRMZM2G361164 | 0.00  |                                                         |
| GRMZM2G363820 | 0.00  |                                                         |
| GRMZM2G364287 | 0.00  | Cytochrome c assembly protein                           |
| GRMZM2G364936 | 0.00  | conserved site                                          |
| GRMZM2G364936 | 0.00  | conserved site                                          |
| GRMZM2G364936 | 0.00  | conserved site                                          |
| GRMZM2G364988 | 0.00  | inhibitor protein II                                    |



|               |      |                                                     |
|---------------|------|-----------------------------------------------------|
| GRMZM2G365957 | 0.00 | Uridine kinase                                      |
| GRMZM2G367438 | 0.00 | Nucleic acid-binding, OB-fold-like                  |
| GRMZM2G371316 | 0.00 |                                                     |
| GRMZM2G372870 | 0.00 | HSP40/DnaJ peptide-binding                          |
| GRMZM2G374302 | 0.00 | Orn/DAP/Arg decarboxylase 2                         |
| GRMZM2G374302 | 0.00 | Orn/DAP/Arg decarboxylase 2                         |
| GRMZM2G374302 | 0.00 | Orn/DAP/Arg decarboxylase 2                         |
| GRMZM2G374302 | 0.00 | Orn/DAP/Arg decarboxylase 2                         |
| GRMZM2G374971 | 0.00 | Thaumatococcus, pathogenesis-related                |
| GRMZM2G375015 | 0.00 | Sucrose-6-phosphate phosphohydrolase C-terminal     |
| GRMZM2G375015 | 0.00 | Sucrose-6-phosphate phosphohydrolase C-terminal     |
| GRMZM2G375015 | 0.00 | Sucrose-6-phosphate phosphohydrolase C-terminal     |
| GRMZM2G375015 | 0.00 | Sucrose-6-phosphate phosphohydrolase C-terminal     |
| GRMZM2G376919 | 0.00 |                                                     |
| GRMZM2G378442 | 0.00 | VQ                                                  |
| GRMZM2G378665 | 0.00 | Transcription factor E2F/dimerisation partner (TDP) |
| GRMZM2G378665 | 0.00 | Transcription factor E2F/dimerisation partner (TDP) |
| GRMZM2G381386 | 0.00 | Zinc finger, RING-type                              |
| GRMZM2G381386 | 0.00 | Zinc finger, RING-type                              |
| GRMZM2G381386 | 0.00 | Zinc finger, RING-type                              |
| GRMZM2G381386 | 0.00 | Zinc finger, RING-type                              |
| GRMZM2G381386 | 0.00 | Zinc finger, RING-type                              |
| GRMZM2G385182 | 0.00 | Pistil-specific extensin-like protein               |
| GRMZM2G385182 | 0.00 | Pistil-specific extensin-like protein               |
| GRMZM2G385182 | 0.00 | Pistil-specific extensin-like protein               |
| GRMZM2G385182 | 0.00 | Pistil-specific extensin-like protein               |
| GRMZM2G385182 | 0.00 | Pistil-specific extensin-like protein               |
| GRMZM2G386608 |      | Like-Sm ribonucleoprotein-related, core             |
| GRMZM2G390211 | 0.00 | Antifreeze protein, type I                          |
| GRMZM2G390211 | 0.00 | Antifreeze protein, type I                          |
| GRMZM2G390211 | 0.00 | Antifreeze protein, type I                          |
| GRMZM2G390876 | 0.00 | RNA recognition motif, RNP-1                        |
| GRMZM2G395728 | 0.00 | Phenol hydroxylase reductase                        |
| GRMZM2G395728 | 0.00 | Phenol hydroxylase reductase                        |

|               |      |                                                       |
|---------------|------|-------------------------------------------------------|
| GRMZM2G395728 | 0.00 | Phenol hydroxylase reductase                          |
| GRMZM2G395728 | 0.00 | Phenol hydroxylase reductase                          |
| GRMZM2G395728 | 0.00 | Phenol hydroxylase reductase                          |
| GRMZM2G397002 |      | Ribosomal protein S25                                 |
| GRMZM2G397044 |      | Peptidyl-prolyl cis-trans isomerase, cyclophilin-type |
| GRMZM2G397557 | 0.00 | NB-ARC                                                |
| GRMZM2G398506 | 0.00 | DNA-binding WRKY                                      |
| GRMZM2G398506 | 0.00 | DNA-binding WRKY                                      |
| GRMZM2G398506 | 0.00 | DNA-binding WRKY                                      |
| GRMZM2G398731 | 0.00 | Formin                                                |
| GRMZM2G399901 | 0.00 | Zinc finger, RING-type, conserved site                |
| GRMZM2G399901 | 0.00 | Zinc finger, RING-type, conserved site                |
| GRMZM2G399901 | 0.00 | Zinc finger, RING-type, conserved site                |
| GRMZM2G400238 | 0.00 | Zinc finger, RING-type                                |
| GRMZM2G400238 | 0.00 | Zinc finger, RING-type                                |
| GRMZM2G400238 | 0.00 | Zinc finger, RING-type                                |
| GRMZM2G402228 | 0.00 |                                                       |
| GRMZM2G404043 | 0.00 | Pentatricopeptide repeat                              |
| GRMZM2G405708 | 0.00 | Peptidase S10, serine carboxypeptidase                |
| GRMZM2G405708 | 0.00 | Peptidase S10, serine carboxypeptidase                |
| GRMZM2G405708 | 0.00 | Peptidase S10, serine carboxypeptidase                |
| GRMZM2G410499 | 0.00 | Auxin responsive SAUR protein                         |
| GRMZM2G418206 | 0.00 | Pentatricopeptide repeat                              |
| GRMZM2G419852 | 0.00 |                                                       |
| GRMZM2G420723 | 0.00 | Pentatricopeptide repeat                              |
| GRMZM2G420988 | 0.00 | Mitochondrial substrate/solute carrier                |
| GRMZM2G420988 | 0.00 | Mitochondrial substrate/solute carrier                |
| GRMZM2G420988 | 0.00 | Mitochondrial substrate/solute carrier                |
| GRMZM2G421541 | 0.00 | Tudor                                                 |
| GRMZM2G421579 | 0.00 |                                                       |
| GRMZM2G421690 | 0.00 | Pentatricopeptide repeat                              |
| GRMZM2G422464 | 0.00 | HhH-GPD domain                                        |

|               |      |                                                             |
|---------------|------|-------------------------------------------------------------|
| GRMZM2G422948 | 0.00 |                                                             |
| GRMZM2G426511 | 0.00 | Epoxide hydrolase-like                                      |
| GRMZM2G427557 | 0.00 | Cytochrome b6/f complex, subunit IV                         |
| GRMZM2G427557 | 0.00 | Cytochrome b6/f complex, subunit IV                         |
| GRMZM2G427557 | 0.00 | Cytochrome b6/f complex, subunit IV                         |
| GRMZM2G427557 | 0.00 | Cytochrome b6/f complex, subunit IV                         |
| GRMZM2G433767 | 0.00 | Peptidase S10, serine carboxypeptidase, active site         |
| GRMZM2G433767 | 0.00 | Peptidase S10, serine carboxypeptidase, active site         |
| GRMZM2G433767 | 0.00 | Peptidase S10, serine carboxypeptidase, active site         |
| GRMZM2G434131 | 0.00 |                                                             |
| GRMZM2G434301 | 0.00 | Bromodomain                                                 |
| GRMZM2G435248 | 0.00 | RNA recognition motif, RNP-1                                |
| GRMZM2G435248 | 0.00 | RNA recognition motif, RNP-1                                |
| GRMZM2G438121 | 0.00 |                                                             |
| GRMZM2G438871 | 0.00 | Tyrosine protein kinase                                     |
| GRMZM2G438871 | 0.00 | Tyrosine protein kinase                                     |
| GRMZM2G438871 | 0.00 | Tyrosine protein kinase                                     |
| GRMZM2G438871 | 0.00 | Tyrosine protein kinase                                     |
| GRMZM2G439198 | 0.00 |                                                             |
| GRMZM2G441565 | 0.00 |                                                             |
| GRMZM2G441722 | 0.00 | Glycoside hydrolase, chitinase active site                  |
| GRMZM2G441722 | 0.00 | Glycoside hydrolase, chitinase active site                  |
| GRMZM2G441722 | 0.00 | Glycoside hydrolase, chitinase active site                  |
| GRMZM2G441722 | 0.00 | Glycoside hydrolase, chitinase active site                  |
| GRMZM2G441722 | 0.00 | Glycoside hydrolase, chitinase active site                  |
| GRMZM2G443889 | 0.00 | Cyclin-like F-box                                           |
| GRMZM2G444541 | 0.00 | S15/NS1, RNA-binding                                        |
| GRMZM2G444541 | 0.00 | S15/NS1, RNA-binding                                        |
| GRMZM2G448344 | 0.00 | Ribulose biphosphate carboxylase, large subunit, N-terminal |
| GRMZM2G448583 | 0.00 | Proteinase inhibitor I9, subtilisin propeptide              |
| GRMZM2G448583 | 0.00 | Proteinase inhibitor I9, subtilisin propeptide              |
| GRMZM2G448583 | 0.00 | Proteinase inhibitor I9, subtilisin propeptide              |
| GRMZM2G448583 | 0.00 | Proteinase inhibitor I9, subtilisin propeptide              |
| GRMZM2G449177 | 0.00 |                                                             |
| GRMZM2G449709 | 0.00 | Protein of unknown function DUF584                          |
| GRMZM2G450863 | 0.00 | RNA recognition motif, RNP-1                                |
| GRMZM2G450863 | 0.00 | RNA recognition motif, RNP-1                                |
| GRMZM2G450863 | 0.00 | RNA recognition motif, RNP-1                                |
| GRMZM2G452189 | 0.00 |                                                             |
| GRMZM2G452529 | 0.00 | Phosphatidate cytidyltransferase, eukaryota                 |
| GRMZM2G454789 | 0.00 | N-6 adenine-specific DNA methylase, conserved site          |
| GRMZM2G454789 | 0.00 | N-6 adenine-specific DNA methylase, conserved site          |
| GRMZM2G455413 | 0.00 |                                                             |

|               |      |                                                                |
|---------------|------|----------------------------------------------------------------|
| GRMZM2G456512 | 0.00 | Protein of unknown function DUF632                             |
| GRMZM2G460988 | 0.00 | Pentatricopeptide repeat                                       |
| GRMZM2G461944 | 0.00 |                                                                |
| GRMZM2G462690 | 0.00 | DNA photolyase, FAD-binding/Cryptochrome, C-terminal           |
| GRMZM2G462690 | 0.00 | DNA photolyase, FAD-binding/Cryptochrome, C-terminal           |
| GRMZM2G462690 | 0.00 | DNA photolyase, FAD-binding/Cryptochrome, C-terminal           |
| GRMZM2G462690 | 0.00 | DNA photolyase, FAD-binding/Cryptochrome, C-terminal           |
| GRMZM2G463462 | 0.00 | Protein of unknown function DUF125, transmembrane              |
| GRMZM2G463785 | 0.00 | Peptidase, cysteine peptidase active site                      |
| GRMZM2G463785 | 0.00 | Peptidase, cysteine peptidase active site                      |
| GRMZM2G463785 | 0.00 | Peptidase, cysteine peptidase active site                      |
| GRMZM2G464212 | 0.00 |                                                                |
| GRMZM2G465287 | 0.00 | Protein phosphatase 2C-related                                 |
| GRMZM2G465287 | 0.00 | Protein phosphatase 2C-related                                 |
| GRMZM2G465287 | 0.00 | Protein phosphatase 2C-related                                 |
| GRMZM2G465287 | 0.00 | Protein phosphatase 2C-related                                 |
| GRMZM2G465287 | 0.00 | Protein phosphatase 2C-related                                 |
| GRMZM2G465287 | 0.00 | Protein phosphatase 2C-related                                 |
| GRMZM2G465287 | 0.00 | Protein phosphatase 2C-related                                 |
| GRMZM2G468111 | 0.00 |                                                                |
| GRMZM2G468147 | 0.00 | Tetratricopeptide TPR2                                         |
| GRMZM2G468260 | 0.00 | Zinc finger, RING-type                                         |
| GRMZM2G468260 | 0.00 | Zinc finger, RING-type                                         |
| GRMZM2G470454 | 0.00 | TGF-beta receptor, type I/II extracellular region              |
| GRMZM2G470454 | 0.00 | TGF-beta receptor, type I/II extracellular region              |
| GRMZM2G470513 | 0.00 | Transcription initiation factor IIA, gamma subunit, N-terminal |
| GRMZM2G470513 | 0.00 | Transcription initiation factor IIA, gamma subunit, N-terminal |
| GRMZM2G471529 | 0.00 | Signal transduction response regulator, receiver region        |
| GRMZM2G471529 | 0.00 | Signal transduction response regulator, receiver region        |
| GRMZM2G471529 | 0.00 | Signal transduction response regulator, receiver region        |
| GRMZM2G471529 | 0.00 | Signal transduction response regulator, receiver region        |
| GRMZM2G471529 | 0.00 | Signal transduction response regulator, receiver region        |
| GRMZM2G471529 | 0.00 | Signal transduction response regulator, receiver region        |
| GRMZM2G471529 | 0.00 | Signal transduction response regulator, receiver region        |
| GRMZM2G472453 | 0.00 |                                                                |
| GRMZM2G473676 | 0.00 | S-locus glycoprotein                                           |
| GRMZM2G473676 | 0.00 | S-locus glycoprotein                                           |
| GRMZM2G473811 | 0.00 | Development and cell death domain                              |
| GRMZM2G475128 | 0.00 | Ribosomal protein S16                                          |
| GRMZM2G475128 | 0.00 | Ribosomal protein S16                                          |
| GRMZM2G475683 | 0.00 | Auxin responsive SAUR protein                                  |
| GRMZM2G480621 | 0.00 | Transcription factor, NFYB/HAP3, conserved site                |
| GRMZM2G480621 | 0.00 | Transcription factor, NFYB/HAP3, conserved site                |
| GRMZM2G484344 | 0.00 | Bacterial methyltransferase                                    |

|               |      |                                                 |
|---------------|------|-------------------------------------------------|
| GRMZM2G550472 | 0.00 | RNA recognition motif, RNP-1                    |
| GRMZM2G550472 | 0.00 | RNA recognition motif, RNP-1                    |
| GRMZM2G700655 | 0.00 |                                                 |
| GRMZM2G701722 | 0.00 |                                                 |
| GRMZM2G703591 | 0.00 | Saposin-like type B, 2                          |
| GRMZM2G703591 | 0.00 | Saposin-like type B, 2                          |
| GRMZM2G703591 | 0.00 | Saposin-like type B, 2                          |
| GRMZM2G703701 | 0.00 |                                                 |
| GRMZM2G704285 | 0.00 | Zinc finger, CW-type                            |
| GRMZM2G704285 | 0.00 | Zinc finger, CW-type                            |
| GRMZM2G704381 | 0.00 | Deoxyribonuclease, TatD-related, conserved site |



|   |            |                              |
|---|------------|------------------------------|
| 1 | GO:0008219 | cell death                   |
| 1 | GO:0009056 | catabolic process            |
| 1 |            |                              |
| 1 | GO:0000166 | nucleotide binding           |
| 1 | GO:0007165 | signal transduction          |
| 1 | GO:0016787 | hydrolase activity           |
| 1 |            |                              |
| 1 |            |                              |
| 1 |            |                              |
| 1 | GO:0006810 | transport                    |
| 1 | GO:0000166 | nucleotide binding           |
| 1 | GO:0005515 | protein binding              |
| 1 | GO:0008219 | cell death                   |
| 1 |            |                              |
| 1 | GO:0006810 | transport                    |
| 1 | GO:0005215 | transporter activity         |
| 1 | GO:0006091 | metabolites and energy       |
| 1 | GO:0006139 | nucleotide and nucleic acid  |
| 1 | GO:0006810 | transport                    |
| 1 | GO:0000166 | nucleotide binding           |
| 1 | GO:0006464 | protein modification process |
| 1 | GO:0016301 | kinase activity              |
| 1 | GO:0000166 | nucleotide binding           |
| 1 | GO:0003677 | DNA binding                  |
| 1 | GO:0005198 | structural molecule activity |
| 1 | GO:0006259 | DNA metabolic process        |
| 1 | GO:0006412 | translation                  |
| 1 | GO:0016787 | hydrolase activity           |
| 1 | GO:0003824 | catalytic activity           |
| 1 | GO:0006464 | protein modification process |
| 1 | GO:0019538 | protein metabolic process    |
| 1 |            |                              |
| 1 |            |                              |
| 1 | GO:0003824 | catalytic activity           |
| 1 | GO:0006629 | lipid metabolic process      |
| 1 | GO:0009058 | biosynthetic process         |
| 1 | GO:0016740 | transferase activity         |
| 2 | GO:0005488 | binding                      |
| 2 | GO:0005515 | protein binding              |
| 2 | GO:0006950 | response to stress           |
| 2 | GO:0009579 | thylakoid                    |
| 2 | GO:0009628 | response to abiotic stimulus |
| 2 | GO:0015979 | photosynthesis               |

|   |            |                               |
|---|------------|-------------------------------|
| 1 |            |                               |
| 1 |            |                               |
| 1 |            |                               |
| 1 |            |                               |
| 4 | GO:0003677 | DNA binding                   |
| 4 | GO:0003700 | transcription factor activity |
| 4 | GO:0006350 | transcription                 |
| 1 | GO:0003676 | nucleic acid binding          |
| 1 | GO:0006810 | transport                     |
| 1 | GO:0008289 | lipid binding                 |
| 1 |            |                               |
| 1 | GO:0000166 | nucleotide binding            |
| 1 | GO:0006810 | transport                     |
| 1 | GO:0007165 | signal transduction           |
| 1 |            |                               |
| 1 | GO:0000166 | nucleotide binding            |
| 1 | GO:0003824 | catalytic activity            |
| 1 | GO:0005488 | binding                       |
| 1 | GO:0006464 | protein modification process  |
| 1 | GO:0007165 | signal transduction           |
| 1 | GO:0016301 | kinase activity               |
| 1 |            |                               |
| 1 | GO:0003676 | nucleic acid binding          |
| 1 | GO:0005488 | binding                       |
| 1 |            |                               |
| 1 | GO:0000166 | nucleotide binding            |
| 1 | GO:0003676 | nucleic acid binding          |
| 1 | GO:0003723 | RNA binding                   |
| 1 | GO:0016787 | hydrolase activity            |
| 1 | GO:0005488 | binding                       |
| 1 | GO:0006950 | response to stress            |
| 1 | GO:0009628 | response to abiotic stimulus  |
| 1 | GO:0000166 | nucleotide binding            |
| 1 | GO:0003677 | DNA binding                   |
| 1 | GO:0003824 | catalytic activity            |
| 1 | GO:0006259 | DNA metabolic process         |
| 1 | GO:0003674 | molecular_function            |
| 1 | GO:0005488 | binding                       |
| 1 | GO:0003674 | molecular_function            |
| 1 | GO:0003824 | catalytic activity            |
| 1 | GO:0019725 | cellular homeostasis          |
| 1 | GO:0006464 | protein modification process  |
| 1 | GO:0003674 | molecular_function            |



|   |            |                                  |
|---|------------|----------------------------------|
| 1 | GO:0003824 | catalytic activity               |
| 1 | GO:0005488 | binding                          |
| 1 | GO:0000166 | nucleotide binding               |
| 1 | GO:0003774 | motor activity                   |
| 1 | GO:0006810 | transport                        |
| 1 |            |                                  |
| 1 |            |                                  |
| 4 | GO:0003677 | DNA binding                      |
| 4 | GO:0006350 | transcription                    |
| 4 | GO:0030528 | transcription regulator activity |
| 1 | GO:0016787 | hydrolase activity               |
| 1 |            |                                  |
| 1 |            |                                  |
| 1 | GO:0019725 | cellular homeostasis             |
| 1 |            |                                  |
| 1 |            |                                  |
| 1 | GO:0003824 | catalytic activity               |
| 1 | GO:0006464 | protein modification process     |
| 1 | GO:0006810 | transport                        |
| 1 | GO:0019538 | protein metabolic process        |
| 1 |            |                                  |
| 1 |            |                                  |
| 1 | GO:0003824 | catalytic activity               |
| 1 |            |                                  |
| 1 | GO:0005215 | transporter activity             |
| 1 | GO:0006810 | transport                        |
| 1 |            |                                  |
| 1 |            |                                  |
| 1 | GO:0003824 | catalytic activity               |
| 1 | GO:0006464 | protein modification process     |
| 1 | GO:0019538 | protein metabolic process        |
| 1 | GO:0019725 | cellular homeostasis             |
| 1 | GO:0000166 | nucleotide binding               |
| 1 | GO:0006464 | protein modification process     |
| 1 | GO:0016301 | kinase activity                  |
| 1 | GO:0003824 | catalytic activity               |
| 1 | GO:0005488 | binding                          |
| 1 | GO:0009058 | biosynthetic process             |
| 2 | GO:0019725 | cellular homeostasis             |
| 1 | GO:0003674 | molecular_function               |
| 1 | GO:0003824 | catalytic activity               |
| 1 | GO:0005488 | binding                          |
| 1 |            |                                  |

|   |            |                                  |
|---|------------|----------------------------------|
| 1 | GO:0005198 | structural molecule activity     |
| 1 | GO:0006412 | translation                      |
| 1 |            |                                  |
| 1 | GO:0005488 | binding                          |
| 1 | GO:0005515 | protein binding                  |
| 1 | GO:0009056 | catabolic process                |
| 1 | GO:0000166 | nucleotide binding               |
| 1 | GO:0005215 | transporter activity             |
| 1 | GO:0006139 | nucleotide and nucleic acid      |
| 1 | GO:0016787 | hydrolase activity               |
| 1 | GO:0005488 | binding                          |
| 1 |            |                                  |
| 1 | GO:0003824 | catalytic activity               |
| 1 | GO:0005488 | binding                          |
| 1 | GO:0005488 | binding                          |
| 1 | GO:0006350 | transcription                    |
| 1 | GO:0009056 | catabolic process                |
| 1 | GO:0016787 | hydrolase activity               |
| 1 | GO:0019538 | protein metabolic process        |
| 1 | GO:0030528 | transcription regulator activity |
| 1 | GO:0019538 | protein metabolic process        |
| 1 |            |                                  |
| 1 |            |                                  |
| 1 | GO:0005488 | binding                          |
| 1 | GO:0006950 | response to stress               |
| 1 | GO:0009628 | response to abiotic stimulus     |
| 1 | GO:0003677 | DNA binding                      |
| 1 | GO:0003700 | transcription factor activity    |
| 1 | GO:0005488 | binding                          |
| 1 | GO:0005515 | protein binding                  |
| 1 | GO:0006350 | transcription                    |
| 1 |            |                                  |
| 2 |            |                                  |
| 2 |            |                                  |
| 1 | GO:0000166 | nucleotide binding               |
| 1 | GO:0003674 | molecular_function               |
| 1 | GO:0003824 | catalytic activity               |
| 1 | GO:0005488 | binding                          |
| 1 | GO:0019538 | protein metabolic process        |
| 1 | GO:0005488 | binding                          |
| 1 | GO:0005488 | binding                          |
| 1 | GO:0005515 | protein binding                  |
| 1 | GO:0005975 | carbohydrate metabolic process   |

|   |            |                                |
|---|------------|--------------------------------|
| 1 | GO:0009058 | biosynthetic process           |
| 1 | GO:0016740 | transferase activity           |
| 1 | GO:0005215 | transporter activity           |
| 1 | GO:0006810 | transport                      |
| 1 |            |                                |
| 2 | GO:0003674 | molecular_function             |
| 2 | GO:0005488 | binding                        |
| 1 |            |                                |
| 1 |            |                                |
| 1 | GO:0003677 | DNA binding                    |
| 1 | GO:0004872 | receptor activity              |
| 1 | GO:0006350 | transcription                  |
| 1 | GO:0007165 | signal transduction            |
| 1 | GO:0003824 | catalytic activity             |
| 1 | GO:0005975 | carbohydrate metabolic process |
| 1 | GO:0006091 | metabolites and energy         |
| 1 | GO:0009058 | biosynthetic process           |
| 1 | GO:0016787 | hydrolase activity             |
| 1 | GO:0005215 | transporter activity           |
| 1 | GO:0006091 | metabolites and energy         |
| 1 | GO:0006139 | nucleotide and nucleic acid    |
| 1 | GO:0006810 | transport                      |
| 1 | GO:0009056 | catabolic process              |
| 1 | GO:0016787 | hydrolase activity             |
| 1 | GO:0019538 | protein metabolic process      |
| 1 |            |                                |
| 1 | GO:0000166 | nucleotide binding             |
| 1 | GO:0006464 | protein modification process   |
| 1 | GO:0016301 | kinase activity                |
| 1 | GO:0006464 | protein modification process   |
| 1 | GO:0005488 | binding                        |
| 1 | GO:0005488 | binding                        |
| 1 | GO:0005515 | protein binding                |
| 1 | GO:0003677 | DNA binding                    |
| 1 | GO:0003700 | transcription factor activity  |
| 1 | GO:0005515 | protein binding                |
| 1 | GO:0006350 | transcription                  |
| 1 |            |                                |
| 1 |            |                                |
| 1 | GO:0006810 | transport                      |
| 1 |            |                                |
| 1 |            |                                |
| 1 |            |                                |

|   |            |                                |
|---|------------|--------------------------------|
| 1 | GO:0006629 | lipid metabolic process        |
| 1 | GO:0000166 | nucleotide binding             |
| 1 | GO:0006464 | protein modification process   |
| 1 | GO:0016301 | kinase activity                |
| 1 |            |                                |
| 1 |            |                                |
| 1 | GO:0005215 | transporter activity           |
| 1 | GO:0005975 | carbohydrate metabolic process |
| 1 | GO:0006810 | transport                      |
| 1 | GO:0009058 | biosynthetic process           |
| 1 |            |                                |
| 1 |            |                                |
| 1 |            |                                |
| 1 |            |                                |
| 1 | GO:0003824 | catalytic activity             |
| 1 |            |                                |
| 1 | GO:0000166 | nucleotide binding             |
| 1 | GO:0004872 | receptor activity              |
| 1 | GO:0006464 | protein modification process   |
| 1 | GO:0016301 | kinase activity                |
| 1 | GO:0000166 | nucleotide binding             |
| 1 | GO:0003824 | catalytic activity             |
| 1 | GO:0006412 | translation                    |
| 1 | GO:0006464 | protein modification process   |
| 1 | GO:0016301 | kinase activity                |
| 1 |            |                                |
| 1 | GO:0005975 | carbohydrate metabolic process |
| 1 | GO:0016787 | hydrolase activity             |
| 1 |            |                                |
| 1 | GO:0006629 | lipid metabolic process        |
| 1 | GO:0016787 | hydrolase activity             |
| 1 | GO:0003677 | DNA binding                    |
| 1 | GO:0006350 | transcription                  |
| 1 | GO:0016740 | transferase activity           |
| 1 |            |                                |
| 1 | GO:0003677 | DNA binding                    |
| 1 | GO:0005515 | protein binding                |
| 1 |            |                                |
| 1 |            |                                |
| 2 | GO:0005198 | structural molecule activity   |
| 2 | GO:0006412 | translation                    |
| 2 | GO:0009056 | catabolic process              |
| 2 | GO:0016787 | hydrolase activity             |

|   |            |                                |
|---|------------|--------------------------------|
| 2 | GO:0019538 | protein metabolic process      |
| 1 |            |                                |
| 1 |            |                                |
| 1 | GO:0005975 | carbohydrate metabolic process |
| 1 | GO:0016787 | hydrolase activity             |
| 1 |            |                                |
| 1 |            |                                |
| 1 |            |                                |
| 1 | GO:0000166 | nucleotide binding             |
| 1 | GO:0003824 | catalytic activity             |
| 1 | GO:0006464 | protein modification process   |
| 1 | GO:0006629 | lipid metabolic process        |
| 1 | GO:0009058 | biosynthetic process           |
| 1 | GO:0016301 | kinase activity                |
| 1 | GO:0016740 | transferase activity           |
| 1 | GO:0016740 | transferase activity           |
| 1 |            |                                |
| 1 |            |                                |
| 1 | GO:0005215 | transporter activity           |
| 1 | GO:0006810 | transport                      |
| 1 | GO:0004871 | signal transducer activity     |
| 1 | GO:0007165 | signal transduction            |
| 1 | GO:0007610 | behavior                       |
| 1 | GO:0009605 | response to external stimulus  |
| 1 | GO:0005215 | transporter activity           |
| 1 | GO:0005488 | binding                        |
| 1 | GO:0006629 | lipid metabolic process        |
| 1 | GO:0009058 | biosynthetic process           |
| 1 | GO:0000166 | nucleotide binding             |
| 1 | GO:0005215 | transporter activity           |
| 1 | GO:0006091 | metabolites and energy         |
| 1 | GO:0006139 | nucleotide and nucleic acid    |
| 1 | GO:0006810 | transport                      |
| 1 | GO:0016787 | hydrolase activity             |
| 1 | GO:0003674 | molecular_function             |
| 1 | GO:0003824 | catalytic activity             |
| 1 | GO:0005488 | binding                        |
| 1 | GO:0006950 | response to stress             |
| 1 |            |                                |
| 1 |            |                                |
| 1 |            |                                |
| 1 |            |                                |
| 1 | GO:0000166 | nucleotide binding             |

|   |            |                               |
|---|------------|-------------------------------|
| 1 | GO:0005488 | binding                       |
| 1 | GO:0006950 | response to stress            |
| 1 | GO:0009628 | response to abiotic stimulus  |
| 1 | GO:0016740 | transferase activity          |
| 1 | GO:0016787 | hydrolase activity            |
| 1 | GO:0005488 | binding                       |
| 1 | GO:0006950 | response to stress            |
| 1 | GO:0009056 | catabolic process             |
| 1 | GO:0009628 | response to abiotic stimulus  |
| 1 | GO:0016787 | hydrolase activity            |
| 1 | GO:0019538 | protein metabolic process     |
| 1 | GO:0005198 | structural molecule activity  |
| 1 | GO:0006412 | translation                   |
| 1 | GO:0005488 | binding                       |
| 1 | GO:0005515 | protein binding               |
| 1 | GO:0019538 | protein metabolic process     |
| 1 | GO:0005488 | binding                       |
| 1 | GO:0006950 | response to stress            |
| 1 | GO:0009628 | response to abiotic stimulus  |
| 1 |            |                               |
| 1 |            |                               |
| 1 | GO:0009056 | catabolic process             |
| 1 | GO:0016787 | hydrolase activity            |
| 1 | GO:0019538 | protein metabolic process     |
| 1 |            |                               |
| 1 |            |                               |
| 1 |            |                               |
| 3 | GO:0005198 | structural molecule activity  |
| 3 | GO:0006412 | translation                   |
| 1 | GO:0003824 | catalytic activity            |
| 1 | GO:0005215 | transporter activity          |
| 1 | GO:0003677 | DNA binding                   |
| 1 | GO:0003700 | transcription factor activity |
| 1 | GO:0006350 | transcription                 |
| 1 |            |                               |
| 1 | GO:0009056 | catabolic process             |
| 1 | GO:0016787 | hydrolase activity            |
| 1 | GO:0019538 | protein metabolic process     |
| 1 | GO:0000166 | nucleotide binding            |
| 1 | GO:0003677 | DNA binding                   |
| 1 | GO:0005488 | binding                       |
| 1 | GO:0005515 | protein binding               |
| 1 | GO:0006259 | DNA metabolic process         |

|   |            |                                  |
|---|------------|----------------------------------|
| 1 | GO:0009058 | biosynthetic process             |
| 1 | GO:0016787 | hydrolase activity               |
| 1 |            |                                  |
| 1 |            |                                  |
| 1 | GO:0003674 | molecular_function               |
| 1 | GO:0005488 | binding                          |
| 1 | GO:0006950 | response to stress               |
| 1 | GO:0009628 | response to abiotic stimulus     |
| 1 | GO:0009056 | catabolic process                |
| 1 | GO:0016787 | hydrolase activity               |
| 1 | GO:0019538 | protein metabolic process        |
| 1 | GO:0005215 | transporter activity             |
| 1 | GO:0006810 | transport                        |
| 1 |            |                                  |
| 1 | GO:0006412 | translation                      |
| 1 | GO:0008135 | nucleic acid binding             |
| 1 | GO:0000166 | nucleotide binding               |
| 1 | GO:0003723 | RNA binding                      |
| 1 | GO:0006810 | transport                        |
| 1 | GO:0005198 | structural molecule activity     |
| 1 | GO:0005488 | binding                          |
| 1 | GO:0009058 | biosynthetic process             |
| 1 | GO:0003676 | nucleic acid binding             |
| 1 | GO:0016740 | transferase activity             |
| 1 | GO:0006810 | transport                        |
| 1 | GO:0006810 | transport                        |
| 1 | GO:0003677 | DNA binding                      |
| 1 | GO:0003700 | transcription factor activity    |
| 1 | GO:0006350 | transcription                    |
| 1 | GO:0030528 | transcription regulator activity |
| 1 | GO:0016740 | transferase activity             |
| 1 | GO:0003676 | nucleic acid binding             |
| 1 | GO:0004518 | nuclease activity                |
| 1 | GO:0003677 | DNA binding                      |
| 1 | GO:0006350 | transcription                    |
| 1 | GO:0016740 | transferase activity             |
| 1 |            |                                  |
| 1 | GO:0000166 | nucleotide binding               |
| 1 | GO:0005488 | binding                          |
| 1 | GO:0006464 | protein modification process     |
| 1 | GO:0016301 | kinase activity                  |
| 1 |            |                                  |
| 2 | GO:0005198 | structural molecule activity     |

|   |            |                              |
|---|------------|------------------------------|
| 2 | GO:0006412 | translation                  |
| 1 | GO:0005515 | protein binding              |
| 1 | GO:0009056 | catabolic process            |
| 1 | GO:0016787 | hydrolase activity           |
| 1 |            |                              |
| 1 |            |                              |
| 1 | GO:0005515 | protein binding              |
| 5 | GO:0000166 | nucleotide binding           |
| 5 | GO:0006810 | transport                    |
| 5 | GO:0007165 | signal transduction          |
| 1 | GO:0005215 | transporter activity         |
| 1 | GO:0006810 | transport                    |
| 1 |            |                              |
| 1 |            |                              |
| 2 |            |                              |
| 1 |            |                              |
| 1 | GO:0005198 | structural molecule activity |
| 1 | GO:0006412 | translation                  |
| 1 | GO:0005215 | transporter activity         |
| 1 | GO:0006810 | transport                    |
| 2 |            |                              |
| 3 | GO:0005198 | structural molecule activity |
| 3 | GO:0006412 | translation                  |
| 1 |            |                              |
| 1 |            |                              |
| 1 | GO:0005198 | structural molecule activity |
| 1 | GO:0006412 | translation                  |
| 1 |            |                              |
| 1 |            |                              |
| 2 |            |                              |
| 1 | GO:0003723 | RNA binding                  |
| 3 |            |                              |
| 1 |            |                              |
| 1 | GO:0005488 | binding                      |
| 1 | GO:0006810 | transport                    |
| 2 | GO:0005198 | structural molecule activity |
| 2 | GO:0006412 | translation                  |
| 1 | GO:0000166 | nucleotide binding           |
| 1 | GO:0006810 | transport                    |
| 1 | GO:0007165 | signal transduction          |
| 1 |            |                              |
| 1 |            |                              |
| 1 |            |                              |



|   |            |                                |
|---|------------|--------------------------------|
| 1 |            |                                |
| 3 | GO:000166  | nucleotide binding             |
| 3 | GO:0019538 | protein metabolic process      |
| 1 |            |                                |
| 1 | GO:0005215 | transporter activity           |
| 1 | GO:0005488 | binding                        |
| 1 | GO:0006629 | lipid metabolic process        |
| 1 | GO:0009058 | biosynthetic process           |
| 1 | GO:000166  | nucleotide binding             |
| 1 | GO:0003774 | motor activity                 |
| 1 | GO:0006810 | transport                      |
| 1 | GO:0005488 | binding                        |
| 1 | GO:0006810 | transport                      |
| 1 |            |                                |
| 1 | GO:0003824 | catalytic activity             |
| 1 |            |                                |
| 2 |            |                                |
| 1 | GO:0005215 | transporter activity           |
| 1 | GO:0005488 | binding                        |
| 1 | GO:0006810 | transport                      |
| 1 | GO:000166  | nucleotide binding             |
| 1 | GO:0006139 | nucleotide and nucleic acid    |
| 1 | GO:0006464 | protein modification process   |
| 1 | GO:0016301 | kinase activity                |
| 1 | GO:0005198 | structural molecule activity   |
| 1 | GO:0006412 | translation                    |
| 1 | GO:0003824 | catalytic activity             |
| 1 |            |                                |
| 1 |            |                                |
| 4 | GO:0005198 | structural molecule activity   |
| 4 | GO:0006412 | translation                    |
| 1 | GO:0003824 | catalytic activity             |
| 1 | GO:0005488 | binding                        |
| 1 | GO:0005975 | carbohydrate metabolic process |
| 1 | GO:0009058 | biosynthetic process           |
| 1 | GO:0016787 | hydrolase activity             |
| 2 |            |                                |
| 1 |            |                                |
| 1 | GO:0004871 | signal transducer activity     |
| 1 | GO:0007165 | signal transduction            |
| 1 | GO:0007610 | behavior                       |
| 1 | GO:0009605 | response to external stimulus  |
| 2 |            |                                |

|   |            |                                |
|---|------------|--------------------------------|
| 1 | GO:0005198 | structural molecule activity   |
| 1 | GO:0006412 | translation                    |
| 1 | GO:0000166 | nucleotide binding             |
| 1 | GO:0003676 | nucleic acid binding           |
| 1 | GO:0016787 | hydrolase activity             |
| 1 |            |                                |
| 4 | GO:0005198 | structural molecule activity   |
| 4 | GO:0006412 | translation                    |
| 1 |            |                                |
| 1 |            |                                |
| 1 | GO:0006810 | transport                      |
| 1 | GO:0008289 | lipid binding                  |
| 6 | GO:0005198 | structural molecule activity   |
| 6 | GO:0006412 | translation                    |
| 3 | GO:0003824 | catalytic activity             |
| 3 | GO:0006464 | protein modification process   |
| 3 | GO:0019538 | protein metabolic process      |
| 1 | GO:0000166 | nucleotide binding             |
| 1 | GO:0004871 | signal transducer activity     |
| 1 | GO:0007165 | signal transduction            |
| 1 | GO:0016301 | kinase activity                |
| 1 | GO:0016740 | transferase activity           |
| 1 | GO:0005198 | structural molecule activity   |
| 1 | GO:0006412 | translation                    |
| 1 |            |                                |
| 1 |            |                                |
| 2 | GO:0005198 | structural molecule activity   |
| 2 | GO:0006412 | translation                    |
| 1 | GO:0005975 | carbohydrate metabolic process |
| 1 | GO:0009058 | biosynthetic process           |
| 1 | GO:0016740 | transferase activity           |
| 1 |            |                                |
| 1 |            |                                |
| 1 | GO:0000166 | nucleotide binding             |
| 1 | GO:0005215 | transporter activity           |
| 1 | GO:0006810 | transport                      |
| 1 | GO:0019538 | protein metabolic process      |
| 1 |            |                                |
| 1 |            |                                |
| 1 | GO:0005488 | binding                        |
| 1 | GO:0009056 | catabolic process              |
| 1 | GO:0016787 | hydrolase activity             |
| 1 | GO:0019538 | protein metabolic process      |

|   |            |                               |
|---|------------|-------------------------------|
| 2 | GO:0003677 | DNA binding                   |
| 1 |            |                               |
| 2 | GO:0003676 | nucleic acid binding          |
| 2 | GO:0003723 | RNA binding                   |
| 1 | GO:0000166 | nucleotide binding            |
| 1 | GO:0003676 | nucleic acid binding          |
| 1 | GO:0003677 | DNA binding                   |
| 1 | GO:0006139 | nucleotide and nucleic acid   |
| 1 | GO:0016787 | hydrolase activity            |
| 1 |            |                               |
| 1 |            |                               |
| 1 | GO:0003674 | molecular_function            |
| 1 | GO:0003824 | catalytic activity            |
| 1 | GO:0005488 | binding                       |
| 1 | GO:0006950 | response to stress            |
| 3 |            |                               |
| 1 | GO:0019538 | protein metabolic process     |
| 1 |            |                               |
| 1 |            |                               |
| 2 | GO:0005515 | protein binding               |
| 2 | GO:0019538 | protein metabolic process     |
| 1 | GO:0005488 | binding                       |
| 1 | GO:0003824 | catalytic activity            |
| 1 | GO:0004872 | receptor activity             |
| 1 | GO:0005488 | binding                       |
| 1 | GO:0006950 | response to stress            |
| 1 | GO:0007165 | signal transduction           |
| 1 | GO:0009605 | response to external stimulus |
| 1 | GO:0003677 | DNA binding                   |
| 1 | GO:0003824 | catalytic activity            |
| 1 | GO:0004872 | receptor activity             |
| 1 | GO:0005488 | binding                       |
| 1 | GO:0006350 | transcription                 |
| 1 |            |                               |
| 5 | GO:0005198 | structural molecule activity  |
| 5 | GO:0006412 | translation                   |
| 1 | GO:0006412 | translation                   |
| 1 | GO:0008135 | nucleic acid binding          |
| 1 | GO:0000166 | nucleotide binding            |
| 1 | GO:0003824 | catalytic activity            |
| 1 |            |                               |
| 1 |            |                               |
| 1 | GO:0005515 | protein binding               |

|   |            |                                |
|---|------------|--------------------------------|
| 1 | GO:0003677 | DNA binding                    |
| 1 | GO:0003723 | RNA binding                    |
| 1 | GO:0006139 | nucleotide and nucleic acid    |
| 1 | GO:0006259 | DNA metabolic process          |
| 1 | GO:0016740 | transferase activity           |
| 1 | GO:0040029 | epigenetic                     |
| 1 | GO:0005488 | binding                        |
| 1 | GO:0005515 | protein binding                |
| 1 |            |                                |
| 1 |            |                                |
| 1 | GO:0005198 | structural molecule activity   |
| 1 | GO:0006412 | translation                    |
| 1 | GO:0006350 | transcription                  |
| 1 | GO:0016740 | transferase activity           |
| 1 | GO:0005488 | binding                        |
| 1 | GO:0006810 | transport                      |
| 1 |            |                                |
| 1 |            |                                |
| 1 | GO:0005975 | carbohydrate metabolic process |
| 1 | GO:0009058 | biosynthetic process           |
| 1 | GO:0016740 | transferase activity           |
| 1 |            |                                |
| 1 |            |                                |
| 1 | GO:0005198 | structural molecule activity   |
| 1 | GO:0006412 | translation                    |
| 1 |            |                                |
| 1 |            |                                |
| 1 |            |                                |
| 1 | GO:0007165 | signal transduction            |
| 1 | GO:0030234 | enzyme regulator activity      |
| 1 |            |                                |
| 1 | GO:0003824 | catalytic activity             |
| 1 |            |                                |
| 1 | GO:0005515 | protein binding                |
| 1 | GO:0019538 | protein metabolic process      |
| 1 | GO:0003824 | catalytic activity             |
| 1 | GO:0005975 | carbohydrate metabolic process |
| 1 | GO:0030246 | carbohydrate binding           |
| 1 |            |                                |
| 1 |            |                                |
| 3 |            |                                |
| 1 | GO:0005488 | binding                        |
| 3 | GO:0000166 | nucleotide binding             |

|   |            |                               |
|---|------------|-------------------------------|
| 3 | GO:0006139 | nucleotide and nucleic acid   |
| 3 | GO:0016301 | kinase activity               |
| 1 |            |                               |
| 1 |            |                               |
| 1 |            |                               |
| 1 | GO:0003677 | DNA binding                   |
| 1 |            |                               |
| 1 | GO:0003677 | DNA binding                   |
| 1 | GO:0005488 | binding                       |
| 1 | GO:0005515 | protein binding               |
| 1 | GO:0007165 | signal transduction           |
| 1 |            |                               |
| 1 | GO:0000166 | nucleotide binding            |
| 1 | GO:0006464 | protein modification process  |
| 1 | GO:0009875 | pollen-pistil interaction     |
| 1 | GO:0016301 | kinase activity               |
| 1 | GO:0030246 | carbohydrate binding          |
| 1 | GO:0000166 | nucleotide binding            |
| 1 | GO:0003674 | molecular_function            |
| 1 | GO:0003824 | catalytic activity            |
| 1 |            |                               |
| 1 | GO:0003824 | catalytic activity            |
| 1 | GO:0009056 | catabolic process             |
| 1 | GO:0016787 | hydrolase activity            |
| 1 | GO:0019538 | protein metabolic process     |
| 1 |            |                               |
| 1 |            |                               |
| 1 | GO:0003677 | DNA binding                   |
| 1 | GO:0016740 | transferase activity          |
| 1 | GO:0006464 | protein modification process  |
| 1 |            |                               |
| 1 | GO:0005488 | binding                       |
| 1 | GO:0003677 | DNA binding                   |
| 1 | GO:0003700 | transcription factor activity |
| 1 | GO:0006350 | transcription                 |
| 1 |            |                               |
| 1 | GO:0000166 | nucleotide binding            |
| 1 | GO:0006464 | protein modification process  |
| 1 | GO:0016301 | kinase activity               |
| 3 |            |                               |
| 1 | GO:0005488 | binding                       |
| 2 |            |                               |
| 2 | GO:0005215 | transporter activity          |

|   |            |                                  |
|---|------------|----------------------------------|
| 2 | GO:0005488 | binding                          |
| 2 | GO:0006629 | lipid metabolic process          |
| 2 | GO:0009058 | biosynthetic process             |
| 1 |            |                                  |
| 1 |            |                                  |
| 1 | GO:0003677 | DNA binding                      |
| 1 | GO:0003700 | transcription factor activity    |
| 1 | GO:0006350 | transcription                    |
| 1 | GO:0005515 | protein binding                  |
| 1 | GO:0019538 | protein metabolic process        |
| 1 |            |                                  |
| 1 | GO:0003676 | nucleic acid binding             |
| 1 | GO:0003677 | DNA binding                      |
| 1 | GO:0005488 | binding                          |
| 1 | GO:0006350 | transcription                    |
| 1 | GO:0016740 | transferase activity             |
| 1 | GO:0030528 | transcription regulator activity |
| 1 | GO:0003824 | catalytic activity               |
| 1 | GO:0005488 | binding                          |
| 1 | GO:0005975 | carbohydrate metabolic process   |
| 1 | GO:0004518 | nuclease activity                |
| 1 | GO:0006259 | DNA metabolic process            |
| 1 | GO:0006950 | response to stress               |
| 1 | GO:0003677 | DNA binding                      |
| 1 | GO:0003700 | transcription factor activity    |
| 1 | GO:0006350 | transcription                    |
| 1 |            |                                  |
| 1 |            |                                  |
| 1 | GO:0000166 | nucleotide binding               |
| 1 | GO:0006464 | protein modification process     |
| 1 | GO:0006810 | transport                        |
| 1 | GO:0016301 | kinase activity                  |
| 1 | GO:0003723 | RNA binding                      |
| 1 | GO:0004518 | nuclease activity                |
| 1 | GO:0005198 | structural molecule activity     |
| 1 | GO:0006412 | translation                      |
| 1 |            |                                  |
| 1 |            |                                  |
| 1 | GO:0000166 | nucleotide binding               |
| 1 | GO:0003824 | catalytic activity               |
| 1 | GO:0005215 | transporter activity             |
| 1 | GO:0005488 | binding                          |
| 1 | GO:0006139 | nucleotide and nucleic acid      |

|   |            |                                  |
|---|------------|----------------------------------|
| 1 | GO:0006810 | transport                        |
| 1 | GO:0016787 | hydrolase activity               |
| 1 |            |                                  |
| 1 |            |                                  |
| 1 |            |                                  |
| 1 |            |                                  |
| 1 |            |                                  |
| 1 | GO:0005488 | binding                          |
| 1 | GO:0005515 | protein binding                  |
| 1 |            |                                  |
| 1 | GO:0003824 | catalytic activity               |
| 1 | GO:0005488 | binding                          |
| 1 |            |                                  |
| 1 | GO:0007275 | development                      |
| 1 | GO:0005488 | binding                          |
| 1 |            |                                  |
| 1 |            |                                  |
| 1 | GO:0005488 | binding                          |
| 1 | GO:0005515 | protein binding                  |
| 1 |            |                                  |
| 1 | GO:0009056 | catabolic process                |
| 1 | GO:0016787 | hydrolase activity               |
| 1 | GO:0019538 | protein metabolic process        |
| 1 | GO:0006629 | lipid metabolic process          |
| 1 | GO:0016787 | hydrolase activity               |
| 1 |            |                                  |
| 1 | GO:0004872 | receptor activity                |
| 1 | GO:0005215 | transporter activity             |
| 1 | GO:0006810 | transport                        |
| 1 | GO:0007165 | signal transduction              |
| 1 | GO:0030312 | external encapsulating structure |
| 1 | GO:0003674 | molecular_function               |
| 1 | GO:0003824 | catalytic activity               |
| 1 | GO:0005488 | binding                          |
| 1 | GO:0006950 | response to stress               |
| 1 |            |                                  |
| 1 | GO:0000166 | nucleotide binding               |
| 1 | GO:0003774 | motor activity                   |
| 1 | GO:0006810 | transport                        |
| 1 |            |                                  |
| 1 |            |                                  |
| 1 | GO:0003677 | DNA binding                      |
| 1 | GO:0005515 | protein binding                  |

|   |            |                                  |
|---|------------|----------------------------------|
| 1 | GO:0006350 | transcription                    |
| 1 | GO:0016740 | transferase activity             |
| 1 | GO:0016787 | hydrolase activity               |
| 1 | GO:0005198 | structural molecule activity     |
| 1 | GO:0006412 | translation                      |
| 1 |            |                                  |
| 1 | GO:0006350 | transcription                    |
| 1 | GO:0030528 | transcription regulator activity |
| 1 | GO:0005488 | binding                          |
| 1 | GO:0006950 | response to stress               |
| 1 | GO:0009628 | response to abiotic stimulus     |
| 2 |            |                                  |
| 1 | GO:0000166 | nucleotide binding               |
| 1 | GO:0006810 | transport                        |
| 1 | GO:0007165 | signal transduction              |
| 1 | GO:0000166 | nucleotide binding               |
| 1 | GO:0003676 | nucleic acid binding             |
| 1 | GO:0003677 | DNA binding                      |
| 1 | GO:0016787 | hydrolase activity               |
| 1 | GO:0016787 | hydrolase activity               |
| 1 | GO:0030234 | enzyme regulator activity        |
| 1 | GO:0003677 | DNA binding                      |
| 1 |            |                                  |
| 1 | GO:0003700 | transcription factor activity    |
| 1 | GO:0005515 | protein binding                  |
| 1 | GO:0006350 | transcription                    |
| 1 | GO:0003824 | catalytic activity               |
| 1 | GO:0006464 | protein modification process     |
| 1 | GO:0019538 | protein metabolic process        |
| 1 |            |                                  |
| 1 | GO:0003824 | catalytic activity               |
| 1 | GO:0005488 | binding                          |
| 1 | GO:0005515 | protein binding                  |
| 1 | GO:0007165 | signal transduction              |
| 1 | GO:0000166 | nucleotide binding               |
| 1 | GO:0004871 | signal transducer activity       |
| 1 | GO:0005975 | carbohydrate metabolic process   |
| 1 | GO:0006350 | transcription                    |
| 1 | GO:0007165 | signal transduction              |
| 1 | GO:0016301 | kinase activity                  |
| 1 | GO:0016740 | transferase activity             |
| 1 | GO:0016787 | hydrolase activity               |
| 1 | GO:0030528 | transcription regulator activity |



|   |            |                              |
|---|------------|------------------------------|
| 1 |            |                              |
| 1 |            |                              |
| 1 |            |                              |
| 1 |            |                              |
| 1 |            |                              |
| 1 | GO:0000166 | nucleotide binding           |
| 1 |            |                              |
| 1 | GO:0005488 | binding                      |
| 1 | GO:0006810 | transport                    |
| 1 |            |                              |
| 1 |            |                              |
| 3 | GO:0003676 | nucleic acid binding         |
| 3 | GO:0004518 | nuclease activity            |
| 3 | GO:0006139 | nucleotide and nucleic acid  |
| 1 | GO:0005515 | protein binding              |
| 1 | GO:0000166 | nucleotide binding           |
| 1 | GO:0005515 | protein binding              |
| 1 | GO:0006464 | protein modification process |
| 1 | GO:0016301 | kinase activity              |
| 1 | GO:0003677 | DNA binding                  |
| 1 | GO:0005488 | binding                      |
| 1 | GO:0006950 | response to stress           |
| 1 | GO:0009628 | response to abiotic stimulus |
| 2 |            |                              |
| 2 | GO:0005198 | structural molecule activity |
| 2 | GO:0005488 | binding                      |
| 2 | GO:0009058 | biosynthetic process         |
| 1 | GO:0005488 | binding                      |
| 1 | GO:0005515 | protein binding              |
| 1 |            |                              |
| 1 | GO:0003824 | catalytic activity           |
| 1 | GO:0006464 | protein modification process |
| 1 | GO:0019538 | protein metabolic process    |
| 1 | GO:0005215 | transporter activity         |
| 1 | GO:0005488 | binding                      |
| 1 | GO:0006810 | transport                    |
| 1 | GO:0005488 | binding                      |
| 1 | GO:0006950 | response to stress           |
| 1 | GO:0009628 | response to abiotic stimulus |
| 1 | GO:0005215 | transporter activity         |
| 1 | GO:0006810 | transport                    |
| 1 | GO:0003824 | catalytic activity           |
| 1 | GO:0005488 | binding                      |

|   |            |                              |
|---|------------|------------------------------|
| 1 | GO:0009058 | biosynthetic process         |
| 1 |            |                              |
| 1 |            |                              |
| 1 |            |                              |
| 2 | GO:0005488 | binding                      |
| 1 | GO:0003676 | nucleic acid binding         |
| 2 | GO:0003674 | molecular_function           |
| 2 | GO:0003824 | catalytic activity           |
| 2 | GO:0019725 | cellular homeostasis         |
| 1 |            |                              |
| 1 |            |                              |
| 2 |            |                              |
| 1 | GO:0003824 | catalytic activity           |
| 1 | GO:0006519 | derivative metabolic process |
| 1 | GO:0009056 | catabolic process            |
| 1 | GO:0005198 | structural molecule activity |
| 1 | GO:0005488 | binding                      |
| 1 | GO:0006412 | translation                  |
| 1 | GO:0006950 | response to stress           |
| 1 | GO:0009628 | response to abiotic stimulus |
| 1 |            |                              |
| 1 |            |                              |
| 1 | GO:0006139 | nucleotide and nucleic acid  |
| 1 | GO:0016740 | transferase activity         |
| 2 | GO:0009579 | thylakoid                    |
| 2 | GO:0015979 | photosynthesis               |
| 1 | GO:0005215 | transporter activity         |
| 1 | GO:0006810 | transport                    |
| 2 | GO:0005198 | structural molecule activity |
| 2 | GO:0006412 | translation                  |
| 1 |            |                              |
| 1 | GO:0005198 | structural molecule activity |
| 1 | GO:0006412 | translation                  |
| 1 | GO:0000166 | nucleotide binding           |
| 1 | GO:0006464 | protein modification process |
| 1 | GO:0016301 | kinase activity              |
| 1 | GO:0005215 | transporter activity         |
| 1 | GO:0005515 | protein binding              |
| 1 | GO:0006810 | transport                    |
| 3 | GO:0003674 | molecular_function           |
| 3 | GO:0003677 | DNA binding                  |
| 3 | GO:0003824 | catalytic activity           |
| 3 | GO:0019725 | cellular homeostasis         |

|   |            |                                  |
|---|------------|----------------------------------|
| 2 |            |                                  |
| 1 | GO:0005488 | binding                          |
| 1 | GO:0006810 | transport                        |
| 1 |            |                                  |
| 1 |            |                                  |
| 1 | GO:0005215 | transporter activity             |
| 1 | GO:0006810 | transport                        |
| 1 | GO:0006350 | transcription                    |
| 1 | GO:0030528 | transcription regulator activity |
| 1 | GO:0000166 | nucleotide binding               |
| 1 | GO:0006464 | protein modification process     |
| 1 | GO:0009056 | catabolic process                |
| 1 | GO:0016301 | kinase activity                  |
| 1 | GO:0016787 | hydrolase activity               |
| 1 | GO:0019538 | protein metabolic process        |
| 1 |            |                                  |
| 2 | GO:0003674 | molecular_function               |
| 2 | GO:0003824 | catalytic activity               |
| 2 | GO:0019725 | cellular homeostasis             |
| 1 | GO:0005198 | structural molecule activity     |
| 1 | GO:0006412 | translation                      |
| 1 | GO:0016740 | transferase activity             |
| 1 | GO:0000166 | nucleotide binding               |
| 1 | GO:0003774 | motor activity                   |
| 1 | GO:0006810 | transport                        |
| 1 | GO:0005215 | transporter activity             |
| 1 | GO:0006810 | transport                        |
| 1 |            |                                  |
| 1 | GO:0000166 | nucleotide binding               |
| 1 | GO:0006464 | protein modification process     |
| 1 | GO:0016301 | kinase activity                  |
| 1 |            |                                  |
| 1 | GO:0004872 | receptor activity                |
| 1 | GO:0007165 | signal transduction              |
| 1 |            |                                  |
| 1 | GO:0003824 | catalytic activity               |
| 1 | GO:0005488 | binding                          |
| 1 | GO:0006464 | protein modification process     |
| 1 | GO:0006950 | response to stress               |
| 1 | GO:0009628 | response to abiotic stimulus     |
| 1 | GO:0016787 | hydrolase activity               |
| 1 | GO:0000166 | nucleotide binding               |
| 1 | GO:0006464 | protein modification process     |

|   |            |                                  |
|---|------------|----------------------------------|
| 1 | GO:0016301 | kinase activity                  |
| 1 | GO:0030246 | carbohydrate binding             |
| 1 | GO:0005975 | carbohydrate metabolic process   |
| 1 | GO:0016787 | hydrolase activity               |
| 1 | GO:0000166 | nucleotide binding               |
| 1 | GO:0006464 | protein modification process     |
| 1 | GO:0009056 | catabolic process                |
| 1 | GO:0016301 | kinase activity                  |
| 1 |            |                                  |
| 1 | GO:0003723 | RNA binding                      |
| 1 | GO:0003824 | catalytic activity               |
| 1 | GO:0005488 | binding                          |
| 1 | GO:0006139 | nucleotide and nucleic acid      |
| 1 | GO:0006950 | response to stress               |
| 1 | GO:0009628 | response to abiotic stimulus     |
| 1 |            |                                  |
| 1 | GO:0006350 | transcription                    |
| 1 | GO:0030528 | transcription regulator activity |
| 1 | GO:0004871 | signal transducer activity       |
| 1 | GO:0006350 | transcription                    |
| 1 | GO:0007165 | signal transduction              |
| 1 | GO:0030528 | transcription regulator activity |
| 1 | GO:0000166 | nucleotide binding               |
| 1 | GO:0003676 | nucleic acid binding             |
| 1 | GO:0006259 | DNA metabolic process            |
| 1 | GO:0016787 | hydrolase activity               |
| 1 | GO:0003677 | DNA binding                      |
| 1 | GO:0006350 | transcription                    |
| 1 | GO:0016740 | transferase activity             |
| 1 | GO:0004518 | nuclease activity                |
| 1 | GO:0005515 | protein binding                  |
| 2 | GO:0005198 | structural molecule activity     |
| 2 | GO:0006412 | translation                      |
| 1 | GO:0003674 | molecular_function               |
| 1 | GO:0003824 | catalytic activity               |
| 1 | GO:0005488 | binding                          |
| 1 | GO:0006950 | response to stress               |
| 1 | GO:0005488 | binding                          |
| 1 |            |                                  |
| 1 |            |                                  |
| 1 |            |                                  |
| 1 |            |                                  |
| 1 | GO:0005215 | transporter activity             |

|   |            |                              |
|---|------------|------------------------------|
| 1 | GO:0005515 | protein binding              |
| 1 | GO:0006810 | transport                    |
| 1 | GO:0000166 | nucleotide binding           |
| 1 | GO:0006464 | protein modification process |
| 1 | GO:0016301 | kinase activity              |
| 1 | GO:0016740 | transferase activity         |
| 1 |            |                              |
| 1 |            |                              |
| 1 |            |                              |
| 1 |            |                              |
| 1 | GO:0006950 | response to stress           |
| 1 | GO:0009628 | response to abiotic stimulus |
| 1 | GO:0006139 | nucleotide and nucleic acid  |
| 1 | GO:0000166 | nucleotide binding           |
| 1 | GO:0004872 | receptor activity            |
| 1 | GO:0005488 | binding                      |
| 1 | GO:0006464 | protein modification process |
| 1 | GO:0007165 | signal transduction          |
| 1 | GO:0016301 | kinase activity              |
| 1 | GO:0003824 | catalytic activity           |
| 1 | GO:0006519 | derivative metabolic process |
| 1 | GO:0008289 | lipid binding                |
| 1 | GO:0003676 | nucleic acid binding         |
| 1 | GO:0003677 | DNA binding                  |
| 1 | GO:0005515 | protein binding              |
| 1 | GO:0006350 | transcription                |
| 1 | GO:0003676 | nucleic acid binding         |
| 1 | GO:0004518 | nuclease activity            |
| 1 | GO:0006139 | nucleotide and nucleic acid  |
| 1 |            |                              |
| 1 | GO:0000166 | nucleotide binding           |
| 1 | GO:0009056 | catabolic process            |
| 1 | GO:0016787 | hydrolase activity           |
| 1 | GO:0019538 | protein metabolic process    |
| 2 | GO:0005488 | binding                      |
| 2 | GO:0005515 | protein binding              |
| 1 |            |                              |
| 1 |            |                              |
| 1 |            |                              |
| 1 | GO:0009056 | catabolic process            |
| 1 | GO:0016787 | hydrolase activity           |
| 1 | GO:0019538 | protein metabolic process    |
| 1 |            |                              |

|   |            |                                |
|---|------------|--------------------------------|
| 1 | GO:0000166 | nucleotide binding             |
| 1 | GO:0005215 | transporter activity           |
| 1 | GO:0006810 | transport                      |
| 1 | GO:0016740 | transferase activity           |
| 1 | GO:0016787 | hydrolase activity             |
| 1 |            |                                |
| 1 |            |                                |
| 1 | GO:0000166 | nucleotide binding             |
| 1 | GO:0005215 | transporter activity           |
| 1 | GO:0005515 | protein binding                |
| 1 | GO:0006139 | nucleotide and nucleic acid    |
| 1 | GO:0016787 | hydrolase activity             |
| 1 | GO:0019538 | protein metabolic process      |
| 1 | GO:0003824 | catalytic activity             |
| 1 | GO:0006519 | derivative metabolic process   |
| 1 | GO:0009056 | catabolic process              |
| 1 | GO:0009058 | biosynthetic process           |
| 1 |            |                                |
| 1 | GO:0005488 | binding                        |
| 1 | GO:0005975 | carbohydrate metabolic process |
| 1 | GO:0009058 | biosynthetic process           |
| 1 | GO:0016787 | hydrolase activity             |
| 1 |            |                                |
| 1 |            |                                |
| 1 | GO:0003700 | transcription factor activity  |
| 1 | GO:0006350 | transcription                  |
| 1 | GO:0000166 | nucleotide binding             |
| 1 | GO:0003676 | nucleic acid binding           |
| 1 | GO:0005488 | binding                        |
| 1 | GO:0005515 | protein binding                |
| 1 | GO:0016787 | hydrolase activity             |
| 1 | GO:0005198 | structural molecule activity   |
| 1 | GO:0005488 | binding                        |
| 1 | GO:0006950 | response to stress             |
| 1 | GO:0009628 | response to abiotic stimulus   |
| 1 | GO:0016740 | transferase activity           |
| 2 |            |                                |
| 1 | GO:0005488 | binding                        |
| 1 | GO:0006950 | response to stress             |
| 1 | GO:0009628 | response to abiotic stimulus   |
| 1 | GO:0003676 | nucleic acid binding           |
| 1 | GO:0000166 | nucleotide binding             |
| 1 | GO:0003674 | molecular_function             |

|   |            |                               |
|---|------------|-------------------------------|
| 1 | GO:0003824 | catalytic activity            |
| 1 | GO:0005488 | binding                       |
| 1 | GO:0009579 | thylakoid                     |
| 1 | GO:0003677 | DNA binding                   |
| 2 | GO:0003824 | catalytic activity            |
| 1 | GO:0000166 | nucleotide binding            |
| 1 | GO:0005515 | protein binding               |
| 1 | GO:0008219 | cell death                    |
| 1 | GO:0016787 | hydrolase activity            |
| 1 | GO:0003677 | DNA binding                   |
| 1 | GO:0003700 | transcription factor activity |
| 1 | GO:0006350 | transcription                 |
| 1 | GO:0005515 | protein binding               |
| 1 | GO:0003676 | nucleic acid binding          |
| 1 | GO:0005488 | binding                       |
| 1 | GO:0005515 | protein binding               |
| 1 | GO:0003676 | nucleic acid binding          |
| 1 | GO:0005488 | binding                       |
| 1 | GO:0005515 | protein binding               |
| 1 |            |                               |
| 1 |            |                               |
| 1 | GO:0009056 | catabolic process             |
| 1 | GO:0016787 | hydrolase activity            |
| 1 | GO:0019538 | protein metabolic process     |
| 1 |            |                               |
| 1 |            |                               |
| 1 |            |                               |
| 1 |            |                               |
| 1 | GO:0005215 | transporter activity          |
| 1 | GO:0005488 | binding                       |
| 1 | GO:0006810 | transport                     |
| 1 | GO:0000166 | nucleotide binding            |
| 1 | GO:0003676 | nucleic acid binding          |
| 1 | GO:0003677 | DNA binding                   |
| 1 | GO:0006259 | DNA metabolic process         |
| 1 | GO:0006950 | response to stress            |
| 1 | GO:0009058 | biosynthetic process          |
| 1 |            |                               |
| 1 |            |                               |
| 1 | GO:0003677 | DNA binding                   |
| 1 | GO:0003824 | catalytic activity            |
| 1 | GO:0006259 | DNA metabolic process         |
| 1 | GO:0006950 | response to stress            |

|   |            |                                |
|---|------------|--------------------------------|
| 1 |            |                                |
| 1 | GO:0003824 | catalytic activity             |
| 1 | GO:0003674 | molecular_function             |
| 1 | GO:0003824 | catalytic activity             |
| 1 | GO:0006091 | metabolites and energy         |
| 1 | GO:0015979 | photosynthesis                 |
| 1 | GO:0009056 | catabolic process              |
| 1 | GO:0016787 | hydrolase activity             |
| 1 | GO:0019538 | protein metabolic process      |
| 1 |            |                                |
| 1 |            |                                |
| 1 | GO:0003676 | nucleic acid binding           |
| 1 | GO:0007275 | development                    |
| 1 |            |                                |
| 1 | GO:0000166 | nucleotide binding             |
| 1 | GO:0006464 | protein modification process   |
| 1 | GO:0016301 | kinase activity                |
| 1 | GO:0030246 | carbohydrate binding           |
| 1 |            |                                |
| 1 |            |                                |
| 1 | GO:0000166 | nucleotide binding             |
| 1 | GO:0005215 | transporter activity           |
| 1 | GO:0005975 | carbohydrate metabolic process |
| 1 | GO:0006810 | transport                      |
| 1 | GO:0016787 | hydrolase activity             |
| 1 |            |                                |
| 1 | GO:0005198 | structural molecule activity   |
| 1 | GO:0006412 | translation                    |
| 1 | GO:0003824 | catalytic activity             |
| 1 | GO:0005515 | protein binding                |
| 1 | GO:0009056 | catabolic process              |
| 1 | GO:0016787 | hydrolase activity             |
| 1 | GO:0019538 | protein metabolic process      |
| 1 |            |                                |
| 1 |            |                                |
| 1 | GO:0003676 | nucleic acid binding           |
| 1 | GO:0006412 | translation                    |
| 1 | GO:0016740 | transferase activity           |
| 1 |            |                                |
| 1 | GO:0016740 | transferase activity           |
| 1 | GO:0003676 | nucleic acid binding           |
| 1 | GO:0016740 | transferase activity           |
| 1 |            |                                |



|   |            |                                  |
|---|------------|----------------------------------|
| 1 |            |                                  |
| 1 |            |                                  |
| 1 |            |                                  |
| 1 | GO:0003824 | catalytic activity               |
| 1 | GO:0006259 | DNA metabolic process            |
| 1 | GO:0006950 | response to stress               |
| 1 | GO:0016740 | transferase activity             |
| 1 |            |                                  |
| 1 | GO:0009056 | catabolic process                |
| 1 | GO:0016787 | hydrolase activity               |
| 1 | GO:0019538 | protein metabolic process        |
| 1 |            |                                  |
| 1 | GO:0003824 | catalytic activity               |
| 1 | GO:0005488 | binding                          |
| 1 | GO:0006464 | protein modification process     |
| 1 | GO:0006950 | response to stress               |
| 1 | GO:0009628 | response to abiotic stimulus     |
| 1 | GO:0016787 | hydrolase activity               |
| 1 |            |                                  |
| 1 |            |                                  |
| 1 | GO:0005488 | binding                          |
| 1 | GO:0005515 | protein binding                  |
| 1 | GO:0005215 | transporter activity             |
| 1 | GO:0006810 | transport                        |
| 1 | GO:0006350 | transcription                    |
| 1 | GO:0030528 | transcription regulator activity |
| 1 | GO:0000166 | nucleotide binding               |
| 1 | GO:0004871 | signal transducer activity       |
| 1 | GO:0006350 | transcription                    |
| 1 | GO:0007165 | signal transduction              |
| 1 | GO:0016301 | kinase activity                  |
| 1 | GO:0016740 | transferase activity             |
| 1 | GO:0030528 | transcription regulator activity |
| 1 |            |                                  |
| 1 | GO:0009875 | pollen-pistil interaction        |
| 1 | GO:0030246 | carbohydrate binding             |
| 1 |            |                                  |
| 1 | GO:0005198 | structural molecule activity     |
| 1 | GO:0006412 | translation                      |
| 1 |            |                                  |
| 1 | GO:0003677 | DNA binding                      |
| 1 | GO:0006350 | transcription                    |
| 1 | GO:0016740 | transferase activity             |

|   |            |                           |
|---|------------|---------------------------|
| 1 | GO:0003676 | nucleic acid binding      |
| 1 | GO:0003723 | RNA binding               |
| 1 |            |                           |
| 1 |            |                           |
| 1 | GO:0009056 | catabolic process         |
| 1 | GO:0016787 | hydrolase activity        |
| 1 | GO:0019538 | protein metabolic process |
| 1 |            |                           |
| 1 | GO:0000166 | nucleotide binding        |
| 1 | GO:0005488 | binding                   |
| 1 | GO:0004518 | nuclease activity         |
