# Supplementary material
Source: PubMed Central journal article supplement (PMC4144787)
Supplement: NIHMS615515-supplement-TableS7.pdf [file NIHMS615515-supplement-TableS7.pdf]

| Stage            | GO Name                                                               |
|------------------|-----------------------------------------------------------------------|
| 1.5mmF vs 1.5mmS | nucleotide binding                                                    |
| 1.5mmF vs 1.5mmS | nucleic acid binding                                                  |
| 1.5mmF vs 1.5mmS | nucleic acid binding                                                  |
| 1.5mmF vs 1.5mmS | nucleic acid binding                                                  |
| 1.5mmF vs 1.5mmS | nucleic acid binding                                                  |
| 1.5mmF vs 1.5mmS | DNA binding                                                           |
| 1.5mmF vs 1.5mmS | DNA binding                                                           |
| 1.5mmF vs 1.5mmS | DNA binding                                                           |
| 1.5mmF vs 1.5mmS | DNA binding                                                           |
| 1.5mmF vs 1.5mmS | DNA binding                                                           |
| 1.5mmF vs 1.5mmS | DNA binding                                                           |
| 1.5mmF vs 1.5mmS | RNA binding                                                           |
| 1.5mmF vs 1.5mmS | RNA binding                                                           |
| 1.5mmF vs 1.5mmS | catalytic activity                                                    |
| 1.5mmF vs 1.5mmS | nuclease activity                                                     |
| 1.5mmF vs 1.5mmS | transporter activity                                                  |
| 1.5mmF vs 1.5mmS | transporter activity                                                  |
| 1.5mmF vs 1.5mmS | transporter activity                                                  |
| 1.5mmF vs 1.5mmS | transporter activity                                                  |
| 1.5mmF vs 1.5mmS | protein binding                                                       |
| 1.5mmF vs 1.5mmS | protein binding                                                       |
| 1.5mmF vs 1.5mmS | protein binding                                                       |
| 1.5mmF vs 1.5mmS | carbohydrate metabolic process                                        |
| 1.5mmF vs 1.5mmS | carbohydrate metabolic process                                        |
| 1.5mmF vs 1.5mmS | carbohydrate metabolic process                                        |
| 1.5mmF vs 1.5mmS | nucleobase, nucleoside, nucleotide and nucleic acid metabolic process |

|                  |                                                                       |
|------------------|-----------------------------------------------------------------------|
| 1.5mmF vs 1.5mmS | nucleobase, nucleoside, nucleotide and nucleic acid metabolic process |
| 1.5mmF vs 1.5mmS | translation                                                           |
| 1.5mmF vs 1.5mmS | transport                                                             |
| 1.5mmF vs 1.5mmS | response to stress                                                    |
| 1.5mmF vs 1.5mmS | signal transduction                                                   |
| 1.5mmF vs 1.5mmS | signal transduction                                                   |
| 1.5mmF vs 1.5mmS | lipid binding                                                         |
| 1.5mmF vs 1.5mmS | response to abiotic stimulus                                          |
| 1.5mmF vs 1.5mmS | photosynthesis                                                        |
| 1.5mmF vs 1.5mmS | photosynthesis                                                        |
| 1.5mmF vs 1.5mmS | photosynthesis                                                        |
| 1.5mmF vs 1.5mmS | kinase activity                                                       |
| 1.5mmF vs 1.5mmS | kinase activity                                                       |
| 1.5mmF vs 1.5mmS | kinase activity                                                       |
| 1.5mmF vs 1.5mmS | transferase activity                                                  |
| 1.5mmF vs 1.5mmS | hydrolase activity                                                    |
| 1.5mmF vs 1.5mmS | protein metabolic process                                             |
| 1.5mmF vs 1.5mmS | protein metabolic process                                             |
| 1.5mmF vs 1.5mmS | protein metabolic process                                             |
| 1.5mmF vs 1.5mmS | protein metabolic process                                             |
| 1.5mmF vs 1.5mmS | respiratory electron transport chain                                  |
| 1.5mmF vs 1.5mmS | respiratory electron transport chain                                  |
| 1.5mmF vs 1.5mmS | enzyme regulator activity                                             |
| 1.5mmF vs 2mmF   | nucleotide binding                                                    |



|                  |                                                   |
|------------------|---------------------------------------------------|
| 1.5mmF vs 2mmF   | translation                                       |
| 1.5mmF vs 2mmF   | transport                                         |
| 1.5mmF vs 2mmF   | response to stress                                |
| 1.5mmF vs 2mmF   | response to stress                                |
| 1.5mmF vs 2mmF   | signal transduction                               |
| 1.5mmF vs 2mmF   | signal transduction                               |
| 1.5mmF vs 2mmF   | translation factor activity, nucleic acid binding |
| 1.5mmF vs 2mmF   | lipid binding                                     |
| 1.5mmF vs 2mmF   | response to abiotic stimulus                      |
| 1.5mmF vs 2mmF   | response to abiotic stimulus                      |
| 1.5mmF vs 2mmF   | photosynthesis                                    |
| 1.5mmF vs 2mmF   | photosynthesis                                    |
| 1.5mmF vs 2mmF   | kinase activity                                   |
| 1.5mmF vs 2mmF   | kinase activity                                   |
| 1.5mmF vs 2mmF   | transferase activity                              |
| 1.5mmF vs 2mmF   | transferase activity                              |
| 1.5mmF vs 2mmF   | hydrolase activity                                |
| 1.5mmF vs 2mmF   | hydrolase activity                                |
| 1.5mmF vs 2mmF   | hydrolase activity                                |
| 1.5mmF vs 2mmF   | protein metabolic process                         |
| 1.5mmF vs 2mmF   | protein metabolic process                         |
| 1.5mmF vs 2mmF   | protein metabolic process                         |
| 1.5mmF vs 2mmF   | protein metabolic process                         |
| 1.5mmF vs 2mmF   | protein metabolic process                         |
| 1.5mmF vs 2mmF   | protein metabolic process                         |
| 1.5mmF vs 2mmF   | respiratory electron transport chain              |
| 1.5mmF vs 2mmF   | enzyme regulator activity                         |
| 1.5mmF vs 2mmF   | enzyme regulator activity                         |
| 1.5mmS vs 1.5mmF | reproduction                                      |
| 1.5mmS vs 1.5mmF | nucleotide binding                                |
| 1.5mmS vs 1.5mmF | nucleotide binding                                |



|                  |                                                   |
|------------------|---------------------------------------------------|
| 1.5mmS vs 1.5mmF | transport                                         |
| 1.5mmS vs 1.5mmF | transport                                         |
| 1.5mmS vs 1.5mmF | transport                                         |
| 1.5mmS vs 1.5mmF | response to stress                                |
| 1.5mmS vs 1.5mmF | response to stress                                |
| 1.5mmS vs 1.5mmF | response to stress                                |
| 1.5mmS vs 1.5mmF | response to stress                                |
| 1.5mmS vs 1.5mmF | signal transduction                               |
| 1.5mmS vs 1.5mmF | signal transduction                               |
| 1.5mmS vs 1.5mmF | signal transduction                               |
| 1.5mmS vs 1.5mmF | translation factor activity, nucleic acid binding |
| 1.5mmS vs 1.5mmF | lipid binding                                     |
| 1.5mmS vs 1.5mmF | response to abiotic stimulus                      |
| 1.5mmS vs 1.5mmF | response to abiotic stimulus                      |
| 1.5mmS vs 1.5mmF | response to abiotic stimulus                      |
| 1.5mmS vs 1.5mmF | photosynthesis                                    |
| 1.5mmS vs 1.5mmF | transferase activity                              |
| 1.5mmS vs 1.5mmF | hydrolase activity                                |
| 1.5mmS vs 1.5mmF | hydrolase activity                                |
| 1.5mmS vs 1.5mmF | hydrolase activity                                |
| 1.5mmS vs 1.5mmF | hydrolase activity                                |
| 1.5mmS vs 1.5mmF | protein metabolic process                         |
| 1.5mmS vs 1.5mmF | protein metabolic process                         |
| 1.5mmS vs 1.5mmF | protein metabolic process                         |
| 1.5mmS vs 1.5mmF | protein metabolic process                         |
| 1.5mmS vs 1.5mmF | carbohydrate binding                              |
| 1.5mmS vs 2mmS   | nucleotide binding                                |
| 1.5mmS vs 2mmS   | nucleotide binding                                |
| 1.5mmS vs 2mmS   | nucleotide binding                                |
| 1.5mmS vs 2mmS   | nucleotide binding                                |
| 1.5mmS vs 2mmS   | nucleic acid binding                              |
| 1.5mmS vs 2mmS   | nucleic acid binding                              |
| 1.5mmS vs 2mmS   | DNA binding                                       |
| 1.5mmS vs 2mmS   | RNA binding                                       |
| 1.5mmS vs 2mmS   | catalytic activity                                |
| 1.5mmS vs 2mmS   | transporter activity                              |
| 1.5mmS vs 2mmS   | transporter activity                              |
| 1.5mmS vs 2mmS   | transporter activity                              |
| 1.5mmS vs 2mmS   | protein binding                                   |
| 1.5mmS vs 2mmS   | protein binding                                   |
| 1.5mmS vs 2mmS   | protein binding                                   |
| 1.5mmS vs 2mmS   | carbohydrate metabolic process                    |

|                |                                                                       |
|----------------|-----------------------------------------------------------------------|
| 1.5mmS vs 2mmS | nucleobase, nucleoside, nucleotide and nucleic acid metabolic process |
| 1.5mmS vs 2mmS | nucleobase, nucleoside, nucleotide and nucleic acid metabolic process |
| 1.5mmS vs 2mmS | DNA metabolic process                                                 |
| 1.5mmS vs 2mmS | transcription                                                         |
| 1.5mmS vs 2mmS | transcription                                                         |
| 1.5mmS vs 2mmS | translation                                                           |
| 1.5mmS vs 2mmS | lipid metabolic process                                               |
| 1.5mmS vs 2mmS | transport                                                             |
| 1.5mmS vs 2mmS | response to stress                                                    |
| 1.5mmS vs 2mmS | response to stress                                                    |
| 1.5mmS vs 2mmS | signal transduction                                                   |
| 1.5mmS vs 2mmS | response to abiotic stimulus                                          |
| 1.5mmS vs 2mmS | transferase activity                                                  |
| 1.5mmS vs 2mmS | hydrolase activity                                                    |
| 1.5mmS vs 2mmS | hydrolase activity                                                    |
| 1.5mmS vs 2mmS | hydrolase activity                                                    |
| 1.5mmS vs 2mmS | hydrolase activity                                                    |
| 1.5mmS vs 2mmS | protein metabolic process                                             |
| 1.5mmS vs 2mmS | protein metabolic process                                             |
| 1.5mmS vs 2mmS | enzyme regulator activity                                             |
| 2mmF vs 1.5mmF | reproduction                                                          |
| 2mmF vs 1.5mmF | nucleotide binding                                                    |
| 2mmF vs 1.5mmF | nucleic acid binding                                                  |
| 2mmF vs 1.5mmF | nucleic acid binding                                                  |
| 2mmF vs 1.5mmF | DNA binding                                                           |
| 2mmF vs 1.5mmF | DNA binding                                                           |
| 2mmF vs 1.5mmF | DNA binding                                                           |
| 2mmF vs 1.5mmF | RNA binding                                                           |
| 2mmF vs 1.5mmF | catalytic activity                                                    |

|                |                                                   |
|----------------|---------------------------------------------------|
| 2mmF vs 1.5mmF | catalytic activity                                |
| 2mmF vs 1.5mmF | catalytic activity                                |
| 2mmF vs 1.5mmF | transporter activity                              |
| 2mmF vs 1.5mmF | transporter activity                              |
| 2mmF vs 1.5mmF | transporter activity                              |
| 2mmF vs 1.5mmF | protein binding                                   |
| 2mmF vs 1.5mmF | carbohydrate metabolic process                    |
| 2mmF vs 1.5mmF | carbohydrate metabolic process                    |
| 2mmF vs 1.5mmF | transcription                                     |
| 2mmF vs 1.5mmF | transcription                                     |
| 2mmF vs 1.5mmF | translation                                       |
| 2mmF vs 1.5mmF | lipid metabolic process                           |
| 2mmF vs 1.5mmF | transport                                         |
| 2mmF vs 1.5mmF | response to stress                                |
| 2mmF vs 1.5mmF | response to stress                                |
| 2mmF vs 1.5mmF | response to stress                                |
| 2mmF vs 1.5mmF | response to stress                                |
| 2mmF vs 1.5mmF | signal transduction                               |
| 2mmF vs 1.5mmF | signal transduction                               |
| 2mmF vs 1.5mmF | signal transduction                               |
| 2mmF vs 1.5mmF | translation factor activity, nucleic acid binding |
| 2mmF vs 1.5mmF | lipid binding                                     |
| 2mmF vs 1.5mmF | response to abiotic stimulus                      |
| 2mmF vs 1.5mmF | response to abiotic stimulus                      |
| 2mmF vs 1.5mmF | response to abiotic stimulus                      |
| 2mmF vs 1.5mmF | photosynthesis                                    |



|                |                                                                       |
|----------------|-----------------------------------------------------------------------|
| 2mmF vs 1.5mmF | photosynthesis                                                        |
| 2mmF vs 1.5mmF | photosynthesis                                                        |
| 2mmF vs 1.5mmF | photosynthesis                                                        |
| 2mmF vs 1.5mmF | transferase activity                                                  |
| 2mmF vs 1.5mmF | hydrolase activity                                                    |
| 2mmF vs 1.5mmF | hydrolase activity                                                    |
| 2mmF vs 1.5mmF | hydrolase activity                                                    |
| 2mmF vs 1.5mmF | hydrolase activity                                                    |
| 2mmF vs 1.5mmF | protein metabolic process                                             |
| 2mmF vs 1.5mmF | protein metabolic process                                             |
| 2mmF vs 1.5mmF | protein metabolic process                                             |
| 2mmF vs 1.5mmF | protein metabolic process                                             |
| 2mmF vs 1.5mmF | carbohydrate binding                                                  |
| 2mmF vs 2mmS   | nucleotide binding                                                    |
| 2mmF vs 2mmS   | nucleotide binding                                                    |
| 2mmF vs 2mmS   | nucleotide binding                                                    |
| 2mmF vs 2mmS   | nucleotide binding                                                    |
| 2mmF vs 2mmS   | nucleotide binding                                                    |
| 2mmF vs 2mmS   | nucleotide binding                                                    |
| 2mmF vs 2mmS   | nucleotide binding                                                    |
| 2mmF vs 2mmS   | RNA binding                                                           |
| 2mmF vs 2mmS   | catalytic activity                                                    |
| 2mmF vs 2mmS   | transporter activity                                                  |
| 2mmF vs 2mmS   | transporter activity                                                  |
| 2mmF vs 2mmS   | transporter activity                                                  |
| 2mmF vs 2mmS   | transporter activity                                                  |
| 2mmF vs 2mmS   | transporter activity                                                  |
| 2mmF vs 2mmS   | transporter activity                                                  |
| 2mmF vs 2mmS   | protein binding                                                       |
| 2mmF vs 2mmS   | carbohydrate metabolic process                                        |
| 2mmF vs 2mmS   | carbohydrate metabolic process                                        |
| 2mmF vs 2mmS   | carbohydrate metabolic process                                        |
| 2mmF vs 2mmS   | nucleobase, nucleoside, nucleotide and nucleic acid metabolic process |
| 2mmF vs 2mmS   | transcription                                                         |

|                |                                                   |
|----------------|---------------------------------------------------|
| 2mmF vs 2mmS   | transcription                                     |
| 2mmF vs 2mmS   | transcription                                     |
| 2mmF vs 2mmS   | translation                                       |
| 2mmF vs 2mmS   | lipid metabolic process                           |
| 2mmF vs 2mmS   | transport                                         |
| 2mmF vs 2mmS   | response to stress                                |
| 2mmF vs 2mmS   | response to stress                                |
| 2mmF vs 2mmS   | signal transduction                               |
| 2mmF vs 2mmS   | translation factor activity, nucleic acid binding |
| 2mmF vs 2mmS   | response to abiotic stimulus                      |
| 2mmF vs 2mmS   | response to abiotic stimulus                      |
| 2mmF vs 2mmS   | photosynthesis                                    |
| 2mmF vs 2mmS   | photosynthesis                                    |
| 2mmF vs 2mmS   | photosynthesis                                    |
| 2mmF vs 2mmS   | transferase activity                              |
| 2mmF vs 2mmS   | hydrolase activity                                |
| 2mmF vs 2mmS   | hydrolase activity                                |
| 2mmF vs 2mmS   | hydrolase activity                                |
| 2mmF vs 2mmS   | hydrolase activity                                |
| 2mmF vs 2mmS   | hydrolase activity                                |
| 2mmF vs 2mmS   | protein metabolic process                         |
| 2mmF vs 2mmS   | protein metabolic process                         |
| 2mmS vs 1.5mmS | reproduction                                      |
| 2mmS vs 1.5mmS | nucleotide binding                                |



|                |                                                                       |
|----------------|-----------------------------------------------------------------------|
| 2mmS vs 1.5mmS | nuclease activity                                                     |
| 2mmS vs 1.5mmS | transporter activity                                                  |
| 2mmS vs 1.5mmS | transporter activity                                                  |
| 2mmS vs 1.5mmS | transporter activity                                                  |
| 2mmS vs 1.5mmS | transporter activity                                                  |
| 2mmS vs 1.5mmS | transporter activity                                                  |
| 2mmS vs 1.5mmS | transporter activity                                                  |
| 2mmS vs 1.5mmS | protein binding                                                       |
| 2mmS vs 1.5mmS | carbohydrate metabolic process                                        |
| 2mmS vs 1.5mmS | carbohydrate metabolic process                                        |
| 2mmS vs 1.5mmS | carbohydrate metabolic process                                        |
| 2mmS vs 1.5mmS | carbohydrate metabolic process                                        |
| 2mmS vs 1.5mmS | carbohydrate metabolic process                                        |
| 2mmS vs 1.5mmS | nucleobase, nucleoside, nucleotide and nucleic acid metabolic process |
| 2mmS vs 1.5mmS | nucleobase, nucleoside, nucleotide and nucleic acid metabolic process |
| 2mmS vs 1.5mmS | transcription                                                         |
| 2mmS vs 1.5mmS | transcription                                                         |
| 2mmS vs 1.5mmS | translation                                                           |
| 2mmS vs 1.5mmS | transport                                                             |
| 2mmS vs 1.5mmS | transport                                                             |
| 2mmS vs 1.5mmS | transport                                                             |

|                |                                                   |
|----------------|---------------------------------------------------|
| 2mmS vs 1.5mmS | transport                                         |
| 2mmS vs 1.5mmS | response to stress                                |
| 2mmS vs 1.5mmS | response to stress                                |
| 2mmS vs 1.5mmS | response to stress                                |
| 2mmS vs 1.5mmS | signal transduction                               |
| 2mmS vs 1.5mmS | translation factor activity, nucleic acid binding |
| 2mmS vs 1.5mmS | lipid binding                                     |
| 2mmS vs 1.5mmS | lipid binding                                     |
| 2mmS vs 1.5mmS | response to abiotic stimulus                      |
| 2mmS vs 1.5mmS | response to abiotic stimulus                      |
| 2mmS vs 1.5mmS | response to abiotic stimulus                      |
| 2mmS vs 1.5mmS | photosynthesis                                    |
| 2mmS vs 1.5mmS | kinase activity                                   |
| 2mmS vs 1.5mmS | kinase activity                                   |
| 2mmS vs 1.5mmS | kinase activity                                   |
| 2mmS vs 1.5mmS | transferase activity                              |
| 2mmS vs 1.5mmS | transferase activity                              |
| 2mmS vs 1.5mmS | hydrolase activity                                |
| 2mmS vs 1.5mmS | hydrolase activity                                |
| 2mmS vs 1.5mmS | hydrolase activity                                |
| 2mmS vs 1.5mmS | hydrolase activity                                |
| 2mmS vs 1.5mmS | protein metabolic process                         |





|              |                                                   |
|--------------|---------------------------------------------------|
| 2mmS vs 2mmF | response to stress                                |
| 2mmS vs 2mmF | response to stress                                |
| 2mmS vs 2mmF | response to stress                                |
| 2mmS vs 2mmF | response to stress                                |
| 2mmS vs 2mmF | signal transduction                               |
| 2mmS vs 2mmF | signal transduction                               |
| 2mmS vs 2mmF | translation factor activity, nucleic acid binding |
| 2mmS vs 2mmF | lipid binding                                     |
| 2mmS vs 2mmF | lipid binding                                     |
| 2mmS vs 2mmF | response to abiotic stimulus                      |
| 2mmS vs 2mmF | response to abiotic stimulus                      |
| 2mmS vs 2mmF | response to abiotic stimulus                      |
| 2mmS vs 2mmF | photosynthesis                                    |
| 2mmS vs 2mmF | photosynthesis                                    |
| 2mmS vs 2mmF | kinase activity                                   |
| 2mmS vs 2mmF | kinase activity                                   |
| 2mmS vs 2mmF | transferase activity                              |
| 2mmS vs 2mmF | transferase activity                              |
| 2mmS vs 2mmF | hydrolase activity                                |
| 2mmS vs 2mmF | hydrolase activity                                |
| 2mmS vs 2mmF | hydrolase activity                                |
| 2mmS vs 2mmF | hydrolase activity                                |
| 2mmS vs 2mmF | protein metabolic process                         |
| 2mmS vs 2mmF | protein metabolic process                         |
| 2mmS vs 2mmF | protein metabolic process                         |
| 2mmS vs 2mmF | protein metabolic process                         |
| 2mmS vs 2mmF | protein metabolic process                         |
| 2mmS vs 2mmF | protein metabolic process                         |
| 2mmS vs 2mmF | protein metabolic process                         |
| 2mmS vs 2mmF | protein metabolic process                         |
| 2mmS vs 2mmF | respiratory electron transport chain              |
| 2mmS vs 2mmF | enzyme regulator activity                         |
| 2mmS vs 2mmF | enzyme regulator activity                         |
| 2mmS vs 2mmF | carbohydrate binding                              |



| <b>GO ID</b> | <b>AccnNumber</b> |
|--------------|-------------------|
| GO:0000166   | GRMZM2G013652     |
| GO:0000166   | GRMZM2G026560     |
| GO:0000166   | GRMZM2G134797     |
| GO:0000166   | GRMZM2G062524     |
| GO:0000166   | GRMZM2G113995     |
| GO:0000166   | GRMZM2G086636     |
| GO:0003676   | GRMZM2G107745     |
| GO:0003676   | GRMZM2G061735     |
| GO:0003676   | GRMZM2G162261     |
| GO:0003676   | GRMZM2G096240     |
| GO:0003677   | GRMZM2G130746     |
| GO:0003677   | GRMZM2G046055     |
| GO:0003677   | GRMZM2G141432     |
| GO:0003677   | GRMZM2G003306     |
| GO:0003677   | GRMZM2G028955     |
| GO:0003677   | GRMZM2G448458     |
| GO:0003723   | GRMZM2G107745     |
| GO:0003723   | GRMZM2G168149     |
| GO:0003824   | GRMZM2G071630     |
| GO:0003824   | GRMZM2G436199     |
| GO:0003824   | GRMZM2G074282     |
| GO:0003824   | GRMZM2G113033     |
| GO:0003824   | GRMZM2G080722     |
| GO:0003824   | GRMZM2G396397     |
| GO:0003824   | GRMZM2G165815     |
| GO:0003824   | GRMZM2G012479     |
| GO:0003824   | GRMZM2G157458     |
| GO:0003824   | GRMZM2G051613     |
| GO:0003824   | GRMZM2G048277     |
| GO:0003824   | GRMZM2G022283     |
| GO:0003824   | GRMZM2G148387     |
| GO:0003824   | GRMZM2G170457     |
| GO:0004518   | GRMZM2G162261     |
| GO:0005215   | GRMZM2G015401     |
| GO:0005215   | GRMZM2G3339503    |
| GO:0005215   | GRMZM2G071630     |
| GO:0005215   | GRMZM2G170457     |
| GO:0005515   | GRMZM2G3339503    |
| GO:0005515   | GRMZM2G014676     |
| GO:0005515   | GRMZM2G150598     |
| GO:0005975   | GRMZM2G071630     |
| GO:0005975   | GRMZM2G382914     |
| GO:0005975   | GRMZM2G062524     |
| GO:0006139   | GRMZM2G134797     |

|            |               |
|------------|---------------|
| GO:0006139 | GRMZM2G162261 |
| GO:0006412 | GRMZM2G168149 |
| GO:0006412 | GRMZM2G077991 |
| GO:0006412 | GRMZM2G176820 |
| GO:0006412 | GRMZM2G181336 |
| GO:0006412 | GRMZM2G027232 |
| GO:0006412 | GRMZM2G019325 |
| GO:0006412 | GRMZM2G366077 |
| GO:0006412 | GRMZM2G142097 |
| GO:0006412 | GRMZM2G010257 |
| GO:0006412 | GRMZM2G011253 |
| GO:0006412 | GRMZM2G030293 |
| GO:0006412 | GRMZM2G140799 |
| GO:0006810 | GRMZM2G126397 |
| GO:0006810 | GRMZM2G026560 |
| GO:0006810 | GRMZM2G147046 |
| GO:0006810 | GRMZM2G015401 |
| GO:0006810 | GRMZM2G339503 |
| GO:0006810 | GRMZM2G071630 |
| GO:0006810 | GRMZM2G086636 |
| GO:0006810 | GRMZM2G113995 |
| GO:0006950 | GRMZM2G012479 |
| GO:0007165 | GRMZM2G086636 |
| GO:0007165 | GRMZM2G113995 |
| GO:0008289 | GRMZM2G126397 |
| GO:0009628 | GRMZM2G012479 |
| GO:0015979 | GRMZM2G157458 |
| GO:0015979 | GRMZM2G077333 |
| GO:0015979 | GRMZM2G176840 |
| GO:0016301 | GRMZM2G062524 |
| GO:0016301 | GRMZM2G382914 |
| GO:0016301 | GRMZM2G134797 |
| GO:0016740 | GRMZM2G062524 |
| GO:0016787 | GRMZM2G100260 |
| GO:0019538 | GRMZM2G014676 |
| GO:0019538 | GRMZM2G030494 |
| GO:0019538 | GRMZM2G013652 |
| GO:0019538 | GRMZM2G150598 |
| GO:0022904 | GRMZM2G170457 |
| GO:0022904 | GRMZM2G051613 |
| GO:0030234 | GRMZM2G440968 |
| GO:0000166 | GRMZM2G134797 |
| GO:0000166 | GRMZM2G062524 |
| GO:0000166 | GRMZM2G113995 |
| GO:0000166 | GRMZM2G013652 |

|            |               |
|------------|---------------|
| GO:0000166 | GRMZM2G086636 |
| GO:0003676 | GRMZM2G061735 |
| GO:0003676 | GRMZM2G096240 |
| GO:0003676 | GRMZM2G042118 |
| GO:0003677 | GRMZM2G397002 |
| GO:0003677 | GRMZM2G448458 |
| GO:0003677 | GRMZM2G003306 |
| GO:0003677 | GRMZM2G028955 |
| GO:0003677 | GRMZM2G030523 |
| GO:0003677 | GRMZM2G130746 |
| GO:0003677 | GRMZM2G046055 |
| GO:0003677 | GRMZM2G099066 |
| GO:0003824 | GRMZM2G080722 |
| GO:0003824 | GRMZM2G012479 |
| GO:0003824 | GRMZM2G048277 |
| GO:0003824 | GRMZM2G074282 |
| GO:0003824 | GRMZM2G157458 |
| GO:0003824 | GRMZM2G113033 |
| GO:0003824 | GRMZM2G436199 |
| GO:0003824 | GRMZM2G396397 |
| GO:0003824 | GRMZM2G148387 |
| GO:0003824 | GRMZM2G300066 |
| GO:0003824 | GRMZM2G165815 |
| GO:0003824 | GRMZM2G170457 |
| GO:0005215 | GRMZM2G042078 |
| GO:0005215 | GRMZM2G339503 |
| GO:0005215 | GRMZM2G015401 |
| GO:0005215 | GRMZM2G170457 |
| GO:0005515 | GRMZM2G049390 |
| GO:0005515 | GRMZM2G150598 |
| GO:0005515 | GRMZM2G339503 |
| GO:0005515 | GRMZM2G091578 |
| GO:0005515 | GRMZM2G014676 |
| GO:0005975 | GRMZM2G057129 |
| GO:0005975 | GRMZM2G062524 |
| GO:0006139 | GRMZM2G134797 |
| GO:0006139 | GRMZM2G042078 |
| GO:0006259 | GRMZM2G030523 |
| GO:0006350 | GRMZM2G040702 |
| GO:0006412 | GRMZM2G142097 |
| GO:0006412 | GRMZM2G157443 |
| GO:0006412 | GRMZM2G010257 |
| GO:0006412 | GRMZM2G011253 |
| GO:0006412 | GRMZM2G113696 |
| GO:0006412 | GRMZM2G016250 |

|            |               |
|------------|---------------|
| GO:0006412 | GRMZM2G027232 |
| GO:0006412 | GRMZM2G098957 |
| GO:0006412 | GRMZM2G030293 |
| GO:0006412 | GRMZM2G181336 |
| GO:0006412 | GRMZM2G030731 |
| GO:0006412 | GRMZM2G119809 |
| GO:0006412 | GRMZM2G080222 |
| GO:0006412 | GRMZM2G083497 |
| GO:0006412 | GRMZM2G019325 |
| GO:0006810 | GRMZM2G042078 |
| GO:0006810 | GRMZM2G015401 |
| GO:0006810 | GRMZM2G113995 |
| GO:0006810 | GRMZM2G147046 |
| GO:0006810 | GRMZM2G126397 |
| GO:0006810 | GRMZM2G086636 |
| GO:0006810 | GRMZM2G339503 |
| GO:0006950 | GRMZM2G012479 |
| GO:0006950 | GRMZM2G157443 |
| GO:0007165 | GRMZM2G113995 |
| GO:0007165 | GRMZM2G086636 |
| GO:0008135 | GRMZM2G113696 |
| GO:0008289 | GRMZM2G126397 |
| GO:0009628 | GRMZM2G157443 |
| GO:0009628 | GRMZM2G012479 |
| GO:0015979 | GRMZM2G157458 |
| GO:0015979 | GRMZM2G176840 |
| GO:0016301 | GRMZM2G062524 |
| GO:0016301 | GRMZM2G134797 |
| GO:0016740 | GRMZM2G040702 |
| GO:0016740 | GRMZM2G062524 |
| GO:0016787 | GRMZM2G057129 |
| GO:0016787 | GRMZM2G100260 |
| GO:0016787 | GRMZM2G091578 |
| GO:0019538 | GRMZM2G014676 |
| GO:0019538 | GRMZM2G030494 |
| GO:0019538 | GRMZM2G091578 |
| GO:0019538 | GRMZM2G150598 |
| GO:0019538 | GRMZM2G013652 |
| GO:0019538 | GRMZM2G049390 |
| GO:0022904 | GRMZM2G170457 |
| GO:0030234 | GRMZM2G030523 |
| GO:0030234 | GRMZM2G440968 |
| GO:0000003 | GRMZM2G124563 |
| GO:0000166 | GRMZM2G067985 |
| GO:0000166 | GRMZM2G127609 |

|            |               |
|------------|---------------|
| GO:0000166 | GRMZM2G091189 |
| GO:0000166 | GRMZM2G075719 |
| GO:0000166 | GRMZM2G073401 |
| GO:0000166 | GRMZM2G044368 |
| GO:0000166 | GRMZM2G027995 |
| GO:0000166 | GRMZM2G061912 |
| GO:0003676 | GRMZM2G027995 |
| GO:0003676 | GRMZM2G077797 |
| GO:0003677 | GRMZM2G084521 |
| GO:0003677 | GRMZM2G101480 |
| GO:0003677 | GRMZM2G174741 |
| GO:0003723 | GRMZM2G077797 |
| GO:0003824 | GRMZM2G046804 |
| GO:0003824 | GRMZM2G084521 |
| GO:0003824 | GRMZM2G026807 |
| GO:0003824 | GRMZM2G124455 |
| GO:0003824 | GRMZM2G163421 |
| GO:0003824 | GRMZM2G061912 |
| GO:0005215 | GRMZM2G146246 |
| GO:0005215 | GRMZM2G046804 |
| GO:0005215 | GRMZM2G181542 |
| GO:0005515 | GRMZM2G044368 |
| GO:0005515 | GRMZM2G067985 |
| GO:0005515 | GRMZM2G061912 |
| GO:0005515 | GRMZM2G009048 |
| GO:0005515 | GRMZM2G066329 |
| GO:0005515 | GRMZM2G091155 |
| GO:0005515 | GRMZM2G075719 |
| GO:0005975 | GRMZM2G046804 |
| GO:0005975 | GRMZM2G026807 |
| GO:0006350 | GRMZM2G044368 |
| GO:0006350 | GRMZM2G061912 |
| GO:0006412 | GRMZM2G104025 |
| GO:0006412 | GRMZM2G031545 |
| GO:0006412 | GRMZM2G026216 |
| GO:0006412 | GRMZM2G078985 |
| GO:0006412 | GRMZM2G019604 |
| GO:0006412 | GRMZM2G091383 |
| GO:0006629 | GRMZM2G181542 |
| GO:0006810 | GRMZM2G044368 |
| GO:0006810 | GRMZM2G046804 |
| GO:0006810 | GRMZM2G061912 |
| GO:0006810 | GRMZM2G066329 |
| GO:0006810 | GRMZM2G163421 |
| GO:0006810 | GRMZM2G146246 |

|            |               |
|------------|---------------|
| GO:0006810 | GRMZM2G136364 |
| GO:0006810 | GRMZM2G075719 |
| GO:0006810 | GRMZM2G088669 |
| GO:0006950 | GRMZM2G456835 |
| GO:0006950 | GRMZM2G009048 |
| GO:0006950 | GRMZM2G075655 |
| GO:0006950 | GRMZM2G045664 |
| GO:0007165 | GRMZM2G061912 |
| GO:0007165 | GRMZM2G044368 |
| GO:0007165 | GRMZM2G075719 |
| GO:0008135 | GRMZM2G031545 |
| GO:0008289 | GRMZM2G136364 |
| GO:0009628 | GRMZM2G075655 |
| GO:0009628 | GRMZM2G009048 |
| GO:0009628 | GRMZM2G045664 |
| GO:0015979 | GRMZM2G153184 |
| GO:0015979 | GRMZM2G009048 |
| GO:0015979 | GRMZM2G174984 |
| GO:0015979 | GRMZM2G451224 |
| GO:0016740 | GRMZM2G032003 |
| GO:0016787 | GRMZM2G075719 |
| GO:0016787 | GRMZM2G044368 |
| GO:0016787 | GRMZM2G027995 |
| GO:0016787 | GRMZM2G061912 |
| GO:0019538 | GRMZM2G127609 |
| GO:0019538 | GRMZM2G073401 |
| GO:0019538 | GRMZM2G031204 |
| GO:0019538 | GRMZM2G091189 |
| GO:0030246 | GRMZM2G169184 |
| GO:0000166 | GRMZM2G106960 |
| GO:0000166 | GRMZM2G073401 |
| GO:0000166 | GRMZM2G067985 |
| GO:0000166 | GRMZM2G027995 |
| GO:0003676 | GRMZM2G027995 |
| GO:0003676 | GRMZM2G077797 |
| GO:0003677 | GRMZM2G030523 |
| GO:0003723 | GRMZM2G077797 |
| GO:0003824 | GRMZM2G300066 |
| GO:0005215 | GRMZM2G042078 |
| GO:0005215 | GRMZM2G181542 |
| GO:0005215 | GRMZM2G008232 |
| GO:0005515 | GRMZM2G049390 |
| GO:0005515 | GRMZM2G106960 |
| GO:0005515 | GRMZM2G067985 |
| GO:0005975 | GRMZM2G057129 |

|            |               |
|------------|---------------|
| GO:0006139 | GRMZM2G008232 |
| GO:0006139 | GRMZM2G042078 |
| GO:0006259 | GRMZM2G030523 |
| GO:0006350 | GRMZM2G106960 |
| GO:0006350 | GRMZM2G040702 |
| GO:0006412 | GRMZM2G044137 |
| GO:0006412 | GRMZM2G098957 |
| GO:0006412 | GRMZM2G083497 |
| GO:0006412 | GRMZM2G066460 |
| GO:0006629 | GRMZM2G181542 |
| GO:0006810 | GRMZM2G042078 |
| GO:0006810 | GRMZM2G008919 |
| GO:0006810 | GRMZM2G008232 |
| GO:0006810 | GRMZM2G106960 |
| GO:0006950 | GRMZM2G075655 |
| GO:0006950 | GRMZM2G456835 |
| GO:0007165 | GRMZM2G106960 |
| GO:0009628 | GRMZM2G075655 |
| GO:0016740 | GRMZM2G040702 |
| GO:0016787 | GRMZM2G008232 |
| GO:0016787 | GRMZM2G027995 |
| GO:0016787 | GRMZM2G057129 |
| GO:0016787 | GRMZM2G106960 |
| GO:0019538 | GRMZM2G049390 |
| GO:0019538 | GRMZM2G073401 |
| GO:0030234 | GRMZM2G030523 |
| GO:0000003 | GRMZM2G124563 |
| GO:0000166 | GRMZM2G027995 |
| GO:0000166 | GRMZM2G044368 |
| GO:0000166 | GRMZM2G075719 |
| GO:0000166 | GRMZM2G073401 |
| GO:0000166 | GRMZM2G127609 |
| GO:0000166 | GRMZM2G091189 |
| GO:0000166 | GRMZM2G061912 |
| GO:0000166 | GRMZM2G067985 |
| GO:0003676 | GRMZM2G077797 |
| GO:0003676 | GRMZM2G027995 |
| GO:0003677 | GRMZM2G084521 |
| GO:0003677 | GRMZM2G101480 |
| GO:0003677 | GRMZM2G174741 |
| GO:0003723 | GRMZM2G077797 |
| GO:0003824 | GRMZM2G084521 |
| GO:0003824 | GRMZM2G061912 |
| GO:0003824 | GRMZM2G124455 |
| GO:0003824 | GRMZM2G163421 |

|            |               |
|------------|---------------|
| GO:0003824 | GRMZM2G046804 |
| GO:0003824 | GRMZM2G026807 |
| GO:0005215 | GRMZM2G146246 |
| GO:0005215 | GRMZM2G181542 |
| GO:0005215 | GRMZM2G046804 |
| GO:0005515 | GRMZM2G044368 |
| GO:0005515 | GRMZM2G009048 |
| GO:0005515 | GRMZM2G066329 |
| GO:0005515 | GRMZM2G067985 |
| GO:0005515 | GRMZM2G091155 |
| GO:0005515 | GRMZM2G075719 |
| GO:0005515 | GRMZM2G061912 |
| GO:0005975 | GRMZM2G046804 |
| GO:0005975 | GRMZM2G026807 |
| GO:0006350 | GRMZM2G061912 |
| GO:0006350 | GRMZM2G044368 |
| GO:0006412 | GRMZM2G031545 |
| GO:0006412 | GRMZM2G019604 |
| GO:0006412 | GRMZM2G026216 |
| GO:0006412 | GRMZM2G104025 |
| GO:0006412 | GRMZM2G091383 |
| GO:0006412 | GRMZM2G078985 |
| GO:0006629 | GRMZM2G181542 |
| GO:0006810 | GRMZM2G136364 |
| GO:0006810 | GRMZM2G163421 |
| GO:0006810 | GRMZM2G046804 |
| GO:0006810 | GRMZM2G061912 |
| GO:0006810 | GRMZM2G146246 |
| GO:0006810 | GRMZM2G075719 |
| GO:0006810 | GRMZM2G044368 |
| GO:0006810 | GRMZM2G088669 |
| GO:0006810 | GRMZM2G066329 |
| GO:0006950 | GRMZM2G009048 |
| GO:0006950 | GRMZM2G075655 |
| GO:0006950 | GRMZM2G456835 |
| GO:0006950 | GRMZM2G045664 |
| GO:0007165 | GRMZM2G061912 |
| GO:0007165 | GRMZM2G044368 |
| GO:0007165 | GRMZM2G075719 |
| GO:0008135 | GRMZM2G031545 |
| GO:0008289 | GRMZM2G136364 |
| GO:0009628 | GRMZM2G075655 |
| GO:0009628 | GRMZM2G009048 |
| GO:0009628 | GRMZM2G045664 |
| GO:0015979 | GRMZM2G451224 |



|            |               |
|------------|---------------|
| GO:0015979 | GRMZM2G009048 |
| GO:0015979 | GRMZM2G174984 |
| GO:0015979 | GRMZM2G153184 |
| GO:0016740 | GRMZM2G032003 |
| GO:0016787 | GRMZM2G044368 |
| GO:0016787 | GRMZM2G075719 |
| GO:0016787 | GRMZM2G061912 |
| GO:0016787 | GRMZM2G027995 |
| GO:0019538 | GRMZM2G127609 |
| GO:0019538 | GRMZM2G073401 |
| GO:0019538 | GRMZM2G091189 |
| GO:0019538 | GRMZM2G031204 |
| GO:0030246 | GRMZM2G169184 |
| GO:0000166 | GRMZM2G091189 |
| GO:0000166 | GRMZM2G061912 |
| GO:0000166 | GRMZM2G044368 |
| GO:0000166 | GRMZM2G026560 |
| GO:0000166 | GRMZM2G106960 |
| GO:0000166 | GRMZM2G075719 |
| GO:0000166 | GRMZM2G127609 |
| GO:0003723 | GRMZM2G168149 |
| GO:0003824 | GRMZM2G124455 |
| GO:0003824 | GRMZM2G163421 |
| GO:0003824 | GRMZM2G071630 |
| GO:0003824 | GRMZM2G022283 |
| GO:0003824 | GRMZM2G026807 |
| GO:0003824 | GRMZM2G046804 |
| GO:0003824 | GRMZM2G061912 |
| GO:0005215 | GRMZM2G146246 |
| GO:0005215 | GRMZM2G071630 |
| GO:0005215 | GRMZM2G181542 |
| GO:0005215 | GRMZM2G008232 |
| GO:0005215 | GRMZM2G046804 |
| GO:0005515 | GRMZM2G009048 |
| GO:0005515 | GRMZM2G091155 |
| GO:0005515 | GRMZM2G066329 |
| GO:0005515 | GRMZM2G075719 |
| GO:0005515 | GRMZM2G106960 |
| GO:0005515 | GRMZM2G061912 |
| GO:0005515 | GRMZM2G044368 |
| GO:0005975 | GRMZM2G046804 |
| GO:0005975 | GRMZM2G071630 |
| GO:0005975 | GRMZM2G026807 |
| GO:0006139 | GRMZM2G008232 |
| GO:0006350 | GRMZM2G106960 |

|            |               |
|------------|---------------|
| GO:0006350 | GRMZM2G044368 |
| GO:0006350 | GRMZM2G061912 |
| GO:0006412 | GRMZM2G104025 |
| GO:0006412 | GRMZM2G031545 |
| GO:0006412 | GRMZM2G026216 |
| GO:0006412 | GRMZM2G168149 |
| GO:0006412 | GRMZM2G044137 |
| GO:0006412 | GRMZM2G066460 |
| GO:0006412 | GRMZM2G176820 |
| GO:0006412 | GRMZM2G019604 |
| GO:0006629 | GRMZM2G181542 |
| GO:0006810 | GRMZM2G026560 |
| GO:0006810 | GRMZM2G046804 |
| GO:0006810 | GRMZM2G066329 |
| GO:0006810 | GRMZM2G071630 |
| GO:0006810 | GRMZM2G061912 |
| GO:0006810 | GRMZM2G146246 |
| GO:0006810 | GRMZM2G163421 |
| GO:0006810 | GRMZM2G075719 |
| GO:0006810 | GRMZM2G008232 |
| GO:0006810 | GRMZM2G044368 |
| GO:0006810 | GRMZM2G106960 |
| GO:0006810 | GRMZM2G008919 |
| GO:0006950 | GRMZM2G045664 |
| GO:0006950 | GRMZM2G009048 |
| GO:0007165 | GRMZM2G106960 |
| GO:0007165 | GRMZM2G044368 |
| GO:0007165 | GRMZM2G061912 |
| GO:0007165 | GRMZM2G075719 |
| GO:0008135 | GRMZM2G031545 |
| GO:0009628 | GRMZM2G045664 |
| GO:0009628 | GRMZM2G009048 |
| GO:0015979 | GRMZM2G174984 |
| GO:0015979 | GRMZM2G009048 |
| GO:0015979 | GRMZM2G451224 |
| GO:0016740 | GRMZM2G032003 |
| GO:0016787 | GRMZM2G008232 |
| GO:0016787 | GRMZM2G044368 |
| GO:0016787 | GRMZM2G061912 |
| GO:0016787 | GRMZM2G075719 |
| GO:0016787 | GRMZM2G106960 |
| GO:0019538 | GRMZM2G091189 |
| GO:0019538 | GRMZM2G127609 |
| GO:0000003 | GRMZM2G124563 |
| GO:0000166 | GRMZM2G044368 |

|            |               |
|------------|---------------|
| GO:0000166 | GRMZM2G013652 |
| GO:0000166 | GRMZM2G113995 |
| GO:0000166 | GRMZM2G026560 |
| GO:0000166 | GRMZM2G134797 |
| GO:0000166 | GRMZM2G127609 |
| GO:0000166 | GRMZM2G091189 |
| GO:0000166 | GRMZM2G086636 |
| GO:0000166 | GRMZM2G075719 |
| GO:0000166 | GRMZM2G061912 |
| GO:0000166 | GRMZM2G062524 |
| GO:0003676 | GRMZM2G162261 |
| GO:0003676 | GRMZM2G107745 |
| GO:0003676 | GRMZM2G061735 |
| GO:0003676 | GRMZM2G096240 |
| GO:0003677 | GRMZM2G028955 |
| GO:0003677 | GRMZM2G003306 |
| GO:0003677 | GRMZM2G174741 |
| GO:0003677 | GRMZM2G130746 |
| GO:0003677 | GRMZM2G448458 |
| GO:0003677 | GRMZM2G084521 |
| GO:0003677 | GRMZM2G101480 |
| GO:0003677 | GRMZM2G046055 |
| GO:0003677 | GRMZM2G141432 |
| GO:0003723 | GRMZM2G168149 |
| GO:0003723 | GRMZM2G107745 |
| GO:0003824 | GRMZM2G012479 |
| GO:0003824 | GRMZM2G022283 |
| GO:0003824 | GRMZM2G124455 |
| GO:0003824 | GRMZM2G396397 |
| GO:0003824 | GRMZM2G048277 |
| GO:0003824 | GRMZM2G051613 |
| GO:0003824 | GRMZM2G061912 |
| GO:0003824 | GRMZM2G074282 |
| GO:0003824 | GRMZM2G080722 |
| GO:0003824 | GRMZM2G084521 |
| GO:0003824 | GRMZM2G046804 |
| GO:0003824 | GRMZM2G113033 |
| GO:0003824 | GRMZM2G071630 |
| GO:0003824 | GRMZM2G436199 |
| GO:0003824 | GRMZM2G148387 |
| GO:0003824 | GRMZM2G157458 |
| GO:0003824 | GRMZM2G163421 |
| GO:0003824 | GRMZM2G165815 |
| GO:0003824 | GRMZM2G170457 |
| GO:0003824 | GRMZM2G026807 |

|            |               |
|------------|---------------|
| GO:0004518 | GRMZM2G162261 |
| GO:0005215 | GRMZM2G146246 |
| GO:0005215 | GRMZM2G071630 |
| GO:0005215 | GRMZM2G170457 |
| GO:0005215 | GRMZM2G046804 |
| GO:0005215 | GRMZM2G339503 |
| GO:0005215 | GRMZM2G015401 |
| GO:0005515 | GRMZM2G014676 |
| GO:0005515 | GRMZM2G091155 |
| GO:0005515 | GRMZM2G339503 |
| GO:0005515 | GRMZM2G066329 |
| GO:0005515 | GRMZM2G075719 |
| GO:0005515 | GRMZM2G061912 |
| GO:0005515 | GRMZM2G150598 |
| GO:0005515 | GRMZM2G009048 |
| GO:0005515 | GRMZM2G044368 |
| GO:0005975 | GRMZM2G062524 |
| GO:0005975 | GRMZM2G046804 |
| GO:0005975 | GRMZM2G071630 |
| GO:0005975 | GRMZM2G382914 |
| GO:0005975 | GRMZM2G026807 |
| GO:0006139 | GRMZM2G134797 |
| GO:0006139 | GRMZM2G162261 |
| GO:0006350 | GRMZM2G061912 |
| GO:0006350 | GRMZM2G044368 |
| GO:0006412 | GRMZM2G176820 |
| GO:0006412 | GRMZM2G142097 |
| GO:0006412 | GRMZM2G011253 |
| GO:0006412 | GRMZM2G168149 |
| GO:0006412 | GRMZM2G181336 |
| GO:0006412 | GRMZM2G027232 |
| GO:0006412 | GRMZM2G026216 |
| GO:0006412 | GRMZM2G019604 |
| GO:0006412 | GRMZM2G019325 |
| GO:0006412 | GRMZM2G030293 |
| GO:0006412 | GRMZM2G078985 |
| GO:0006412 | GRMZM2G077991 |
| GO:0006412 | GRMZM2G140799 |
| GO:0006412 | GRMZM2G031545 |
| GO:0006412 | GRMZM2G010257 |
| GO:0006412 | GRMZM2G104025 |
| GO:0006412 | GRMZM2G366077 |
| GO:0006810 | GRMZM2G026560 |
| GO:0006810 | GRMZM2G075719 |
| GO:0006810 | GRMZM2G136364 |

|            |               |
|------------|---------------|
| GO:0006810 | GRMZM2G086636 |
| GO:0006810 | GRMZM2G061912 |
| GO:0006810 | GRMZM2G126397 |
| GO:0006810 | GRMZM2G147046 |
| GO:0006810 | GRMZM2G046804 |
| GO:0006810 | GRMZM2G015401 |
| GO:0006810 | GRMZM2G163421 |
| GO:0006810 | GRMZM2G044368 |
| GO:0006810 | GRMZM2G146246 |
| GO:0006810 | GRMZM2G088669 |
| GO:0006810 | GRMZM2G339503 |
| GO:0006810 | GRMZM2G113995 |
| GO:0006810 | GRMZM2G071630 |
| GO:0006810 | GRMZM2G066329 |
| GO:0006950 | GRMZM2G012479 |
| GO:0006950 | GRMZM2G045664 |
| GO:0006950 | GRMZM2G009048 |
| GO:0007165 | GRMZM2G086636 |
| GO:0007165 | GRMZM2G061912 |
| GO:0007165 | GRMZM2G044368 |
| GO:0007165 | GRMZM2G075719 |
| GO:0007165 | GRMZM2G113995 |
| GO:0008135 | GRMZM2G031545 |
| GO:0008289 | GRMZM2G126397 |
| GO:0008289 | GRMZM2G136364 |
| GO:0009628 | GRMZM2G009048 |
| GO:0009628 | GRMZM2G012479 |
| GO:0009628 | GRMZM2G045664 |
| GO:0015979 | GRMZM2G077333 |
| GO:0015979 | GRMZM2G157458 |
| GO:0015979 | GRMZM2G153184 |
| GO:0015979 | GRMZM2G176840 |
| GO:0015979 | GRMZM2G009048 |
| GO:0015979 | GRMZM2G451224 |
| GO:0015979 | GRMZM2G174984 |
| GO:0016301 | GRMZM2G134797 |
| GO:0016301 | GRMZM2G382914 |
| GO:0016301 | GRMZM2G062524 |
| GO:0016740 | GRMZM2G032003 |
| GO:0016740 | GRMZM2G062524 |
| GO:0016787 | GRMZM2G044368 |
| GO:0016787 | GRMZM2G061912 |
| GO:0016787 | GRMZM2G100260 |
| GO:0016787 | GRMZM2G075719 |
| GO:0019538 | GRMZM2G091189 |

|            |               |
|------------|---------------|
| GO:0019538 | GRMZM2G014676 |
| GO:0019538 | GRMZM2G030494 |
| GO:0019538 | GRMZM2G127609 |
| GO:0019538 | GRMZM2G150598 |
| GO:0019538 | GRMZM2G013652 |
| GO:0022904 | GRMZM2G051613 |
| GO:0022904 | GRMZM2G170457 |
| GO:0030234 | GRMZM2G440968 |
| GO:0030246 | GRMZM2G169184 |
| GO:0000003 | GRMZM2G124563 |
| GO:0000166 | GRMZM2G062524 |
| GO:0000166 | GRMZM2G113995 |
| GO:0000166 | GRMZM2G067985 |
| GO:0000166 | GRMZM2G027995 |
| GO:0000166 | GRMZM2G073401 |
| GO:0000166 | GRMZM2G086636 |
| GO:0000166 | GRMZM2G013652 |
| GO:0000166 | GRMZM2G134797 |
| GO:0003676 | GRMZM2G096240 |
| GO:0003676 | GRMZM2G077797 |
| GO:0003676 | GRMZM2G027995 |
| GO:0003676 | GRMZM2G042118 |
| GO:0003676 | GRMZM2G061735 |
| GO:0003677 | GRMZM2G101480 |
| GO:0003677 | GRMZM2G099066 |
| GO:0003677 | GRMZM2G084521 |
| GO:0003677 | GRMZM2G174741 |
| GO:0003677 | GRMZM2G397002 |
| GO:0003677 | GRMZM2G448458 |
| GO:0003677 | GRMZM2G046055 |
| GO:0003677 | GRMZM2G130746 |
| GO:0003677 | GRMZM2G030523 |
| GO:0003677 | GRMZM2G003306 |
| GO:0003677 | GRMZM2G028955 |
| GO:0003723 | GRMZM2G077797 |
| GO:0003824 | GRMZM2G148387 |
| GO:0003824 | GRMZM2G012479 |
| GO:0003824 | GRMZM2G113033 |
| GO:0003824 | GRMZM2G396397 |
| GO:0003824 | GRMZM2G074282 |
| GO:0003824 | GRMZM2G048277 |
| GO:0003824 | GRMZM2G170457 |
| GO:0003824 | GRMZM2G157458 |
| GO:0003824 | GRMZM2G300066 |
| GO:0003824 | GRMZM2G165815 |

|            |               |
|------------|---------------|
| GO:0003824 | GRMZM2G080722 |
| GO:0003824 | GRMZM2G436199 |
| GO:0003824 | GRMZM2G084521 |
| GO:0005215 | GRMZM2G339503 |
| GO:0005215 | GRMZM2G015401 |
| GO:0005215 | GRMZM2G170457 |
| GO:0005215 | GRMZM2G042078 |
| GO:0005515 | GRMZM2G150598 |
| GO:0005515 | GRMZM2G339503 |
| GO:0005515 | GRMZM2G067985 |
| GO:0005515 | GRMZM2G014676 |
| GO:0005515 | GRMZM2G049390 |
| GO:0005515 | GRMZM2G091578 |
| GO:0005975 | GRMZM2G057129 |
| GO:0005975 | GRMZM2G062524 |
| GO:0006139 | GRMZM2G042078 |
| GO:0006139 | GRMZM2G134797 |
| GO:0006259 | GRMZM2G030523 |
| GO:0006350 | GRMZM2G040702 |
| GO:0006412 | GRMZM2G181336 |
| GO:0006412 | GRMZM2G091383 |
| GO:0006412 | GRMZM2G011253 |
| GO:0006412 | GRMZM2G113696 |
| GO:0006412 | GRMZM2G119809 |
| GO:0006412 | GRMZM2G030731 |
| GO:0006412 | GRMZM2G010257 |
| GO:0006412 | GRMZM2G157443 |
| GO:0006412 | GRMZM2G030293 |
| GO:0006412 | GRMZM2G027232 |
| GO:0006412 | GRMZM2G019325 |
| GO:0006412 | GRMZM2G098957 |
| GO:0006412 | GRMZM2G078985 |
| GO:0006412 | GRMZM2G080222 |
| GO:0006412 | GRMZM2G083497 |
| GO:0006412 | GRMZM2G016250 |
| GO:0006412 | GRMZM2G142097 |
| GO:0006810 | GRMZM2G147046 |
| GO:0006810 | GRMZM2G126397 |
| GO:0006810 | GRMZM2G136364 |
| GO:0006810 | GRMZM2G086636 |
| GO:0006810 | GRMZM2G015401 |
| GO:0006810 | GRMZM2G113995 |
| GO:0006810 | GRMZM2G042078 |
| GO:0006810 | GRMZM2G339503 |
| GO:0006810 | GRMZM2G088669 |

|            |               |
|------------|---------------|
| GO:0006950 | GRMZM2G157443 |
| GO:0006950 | GRMZM2G012479 |
| GO:0006950 | GRMZM2G456835 |
| GO:0006950 | GRMZM2G075655 |
| GO:0007165 | GRMZM2G113995 |
| GO:0007165 | GRMZM2G086636 |
| GO:0008135 | GRMZM2G113696 |
| GO:0008289 | GRMZM2G136364 |
| GO:0008289 | GRMZM2G126397 |
| GO:0009628 | GRMZM2G157443 |
| GO:0009628 | GRMZM2G012479 |
| GO:0009628 | GRMZM2G075655 |
| GO:0015979 | GRMZM2G176840 |
| GO:0015979 | GRMZM2G157458 |
| GO:0016301 | GRMZM2G134797 |
| GO:0016301 | GRMZM2G062524 |
| GO:0016740 | GRMZM2G062524 |
| GO:0016740 | GRMZM2G040702 |
| GO:0016787 | GRMZM2G027995 |
| GO:0016787 | GRMZM2G057129 |
| GO:0016787 | GRMZM2G091578 |
| GO:0016787 | GRMZM2G100260 |
| GO:0019538 | GRMZM2G013652 |
| GO:0019538 | GRMZM2G091578 |
| GO:0019538 | GRMZM2G150598 |
| GO:0019538 | GRMZM2G014676 |
| GO:0019538 | GRMZM2G049390 |
| GO:0019538 | GRMZM2G030494 |
| GO:0019538 | GRMZM2G031204 |
| GO:0019538 | GRMZM2G073401 |
| GO:0022904 | GRMZM2G170457 |
| GO:0030234 | GRMZM2G440968 |
| GO:0030234 | GRMZM2G030523 |
| GO:0030246 | GRMZM2G169184 |



| InterPro Protein Name                           |
|-------------------------------------------------|
| Chaperonin Cpn10                                |
| Kinesin, motor region                           |
| Nucleoside diphosphate kinase, core             |
| Armadillo                                       |
| ADP-ribosylation factor                         |
| ADP-ribosylation factor                         |
| Paraneoplastic encephalomyelitis antigen        |
| Alba, DNA/RNA-binding protein                   |
| 3'-5' exonuclease                               |
| Alba, DNA/RNA-binding protein                   |
| Histone core                                    |
| Histone core                                    |
| High mobility group protein HMG14 and HMG17     |
| Histone core                                    |
| Histone core                                    |
| Histone core                                    |
| Paraneoplastic encephalomyelitis antigen        |
| Ribosomal protein S5, C-terminal                |
| Glyceraldehyde 3-phosphate dehydrogenase        |
| Thioredoxin                                     |
| BTB/POZ fold                                    |
| Ribulose bisphosphate carboxylase, small chain  |
| Glutaredoxin                                    |
| ETC complex I subunit conserved region          |
| Histidine triad (HIT) protein                   |
| Antifreeze protein, type I                      |
| Electron transport accessory protein            |
| ETC complex I subunit                           |
| Peptidyl-prolyl cis-trans isomerase, PpiC-type  |
| Histidine triad (HIT) protein                   |
| Glutaredoxin                                    |
| Cytochrome bd ubiquinol oxidase, 14 kDa subunit |
| 3'-5' exonuclease                               |
| Adenine nucleotide translocator 1               |
| Mitochondrial import translocase, subunit Tom7  |
| Glyceraldehyde 3-phosphate dehydrogenase        |
| Cytochrome bd ubiquinol oxidase, 14 kDa subunit |
| Mitochondrial import translocase, subunit Tom7  |
| Prefoldin                                       |
| Clp, N-terminal                                 |
| Glyceraldehyde 3-phosphate dehydrogenase        |
| Phosphoglycerate kinase                         |
| Armadillo                                       |
| Nucleoside diphosphate kinase, core             |

|                                                                  |
|------------------------------------------------------------------|
| 3'-5' exonuclease                                                |
| Ribosomal protein S5, C-terminal                                 |
| Ribosomal protein L37e                                           |
| Ribosomal protein L11                                            |
| Ribosomal protein L35Ae                                          |
| Ribosomal protein L11                                            |
| Nucleic acid-binding, OB-fold-like                               |
| KOW                                                              |
| Ribosomal protein L18, bacterial                                 |
| Ribosomal protein 60S                                            |
| Ribosomal protein L31e                                           |
| Nucleic acid-binding, OB-fold-like                               |
| High mobility group-like nuclear protein                         |
| Bifunctional inhibitor/plant lipid transfer protein/seed storage |
| Kinesin, motor region                                            |
| emp24/gp25L/p24                                                  |
| Adenine nucleotide translocator 1                                |
| Mitochondrial import translocase, subunit Tom7                   |
| Glyceraldehyde 3-phosphate dehydrogenase                         |
| ADP-ribosylation factor                                          |
| ADP-ribosylation factor                                          |
| Antifreeze protein, type I                                       |
| ADP-ribosylation factor                                          |
| ADP-ribosylation factor                                          |
| Bifunctional inhibitor/plant lipid transfer protein/seed storage |
| Antifreeze protein, type I                                       |
| Electron transport accessory protein                             |
| Chlorophyll A-B binding protein                                  |
| Mog1/PsbP/DUF1795, alpha/beta/alpha sandwich                     |
| Armadillo                                                        |
| Phosphoglycerate kinase                                          |
| Nucleoside diphosphate kinase, core                              |
| Armadillo                                                        |
| D-tyrosyl-tRNA(Tyr) deacylase                                    |
| Prefoldin                                                        |
| Peptidyl-prolyl cis-trans isomerase, FKBP-type                   |
| Chaperonin Cpn10                                                 |
| Clp, N-terminal                                                  |
| Cytochrome bd ubiquinol oxidase, 14 kDa subunit                  |
| ETC complex I subunit                                            |
| Proteinase inhibitor I25, cystatin                               |
| Nucleoside diphosphate kinase, core                              |
| Armadillo                                                        |
| ADP-ribosylation factor                                          |
| Chaperonin Cpn10                                                 |

|                                                    |
|----------------------------------------------------|
| ADP-ribosylation factor                            |
| Alba, DNA/RNA-binding protein                      |
| Alba, DNA/RNA-binding protein                      |
| RNA recognition motif, RNP-1                       |
| High mobility group protein HMG14 and HMG17        |
| Histone core                                       |
| Histone core                                       |
| Histone core                                       |
| Proliferating cell nuclear antigen, PCNA           |
| Histone core                                       |
| Histone core                                       |
| Histone core                                       |
| Glutaredoxin                                       |
| Antifreeze protein, type I                         |
| Peptidyl-prolyl cis-trans isomerase, PpiC-type     |
| BTB/POZ fold                                       |
| Electron transport accessory protein               |
| Ribulose biphosphate carboxylase, small chain      |
| Thioredoxin                                        |
| ETC complex I subunit conserved region             |
| Glutaredoxin                                       |
| Thioredoxin                                        |
| Histidine triad (HIT) protein                      |
| Cytochrome bd ubiquinol oxidase, 14 kDa subunit    |
| ATPase, F0 complex, subunit G, mitochondrial       |
| Mitochondrial import translocase, subunit Tom7     |
| Adenine nucleotide translocator 1                  |
| Cytochrome bd ubiquinol oxidase, 14 kDa subunit    |
| Nebulin                                            |
| Clp, N-terminal                                    |
| Mitochondrial import translocase, subunit Tom7     |
| Peptidase S8 and S53, subtilisin, kexin, sedolisin |
| Prefoldin                                          |
| Glycoside hydrolase, family 1, active site         |
| Armadillo                                          |
| Nucleoside diphosphate kinase, core                |
| ATPase, F0 complex, subunit G, mitochondrial       |
| Proliferating cell nuclear antigen, PCNA           |
| RNA polymerase Rpb7, N-terminal                    |
| Ribosomal protein L18, bacterial                   |
| Antifreeze protein, type I                         |
| Ribosomal protein 60S                              |
| Ribosomal protein L31e                             |
| Eukaryotic initiation factor 5A hypusine (eIF-5A)  |
| KOW                                                |

|                                                                  |
|------------------------------------------------------------------|
| Ribosomal protein L11                                            |
| Ribosomal protein L14, bacterial-type                            |
| Nucleic acid-binding, OB-fold-like                               |
| Ribosomal protein L35Ae                                          |
| Ribosomal protein L15                                            |
| Ribosomal protein 60S                                            |
| Ribosomal protein S15, eukaryotic/archaeal                       |
| Ribosomal protein S8                                             |
| Nucleic acid-binding, OB-fold-like                               |
| ATPase, F0 complex, subunit G, mitochondrial                     |
| Adenine nucleotide translocator 1                                |
| ADP-ribosylation factor                                          |
| emp24/gp25L/p24                                                  |
| Bifunctional inhibitor/plant lipid transfer protein/seed storage |
| ADP-ribosylation factor                                          |
| Mitochondrial import translocase, subunit Tom7                   |
| Antifreeze protein, type I                                       |
| Antifreeze protein, type I                                       |
| ADP-ribosylation factor                                          |
| ADP-ribosylation factor                                          |
| Eukaryotic initiation factor 5A hypusine (eIF-5A)                |
| Bifunctional inhibitor/plant lipid transfer protein/seed storage |
| Antifreeze protein, type I                                       |
| Antifreeze protein, type I                                       |
| Electron transport accessory protein                             |
| Mog1/PsbP/DUF1795, alpha/beta/alpha sandwich                     |
| Armadillo                                                        |
| Nucleoside diphosphate kinase, core                              |
| RNA polymerase Rpb7, N-terminal                                  |
| Armadillo                                                        |
| Glycoside hydrolase, family 1, active site                       |
| D-tyrosyl-tRNA(Tyr) deacylase                                    |
| Peptidase S8 and S53, subtilisin, kexin, sedolisin               |
| Prefoldin                                                        |
| Peptidyl-prolyl cis-trans isomerase, FKBP-type                   |
| Peptidase S8 and S53, subtilisin, kexin, sedolisin               |
| Clp, N-terminal                                                  |
| Chaperonin Cpn10                                                 |
| Nebulin                                                          |
| Cytochrome bd ubiquinol oxidase, 14 kDa subunit                  |
| Proliferating cell nuclear antigen, PCNA                         |
| Proteinase inhibitor I25, cystatin                               |
| Adenovirus fibre protein                                         |
| Actin, conserved site                                            |
| Chaperonin 21, chloroplast                                       |

|                                                        |
|--------------------------------------------------------|
| Chaperonin 21, chloroplast                             |
| ADP-ribosylation factor                                |
| Chaperonin Cpn10                                       |
| ADP-ribosylation factor                                |
| DEAD-like helicase, N-terminal                         |
| ADP-ribosylation factor                                |
| DEAD-like helicase, N-terminal                         |
| Paraneoplastic encephalomyelitis antigen               |
| Cyclophilin-like                                       |
| Helix-turn-helix type 3                                |
| DNA-binding TFAR19-related protein                     |
| Paraneoplastic encephalomyelitis antigen               |
| Glyceraldehyde 3-phosphate dehydrogenase               |
| Cyclophilin-like                                       |
| Ribulose-phosphate 3-epimerase                         |
| Manganese and iron superoxide dismutase                |
| Disulphide isomerase                                   |
| ADP-ribosylation factor                                |
| Glutathione S-transferase, C-terminal                  |
| Glyceraldehyde 3-phosphate dehydrogenase               |
| Acyl carrier protein (ACP)                             |
| ADP-ribosylation factor                                |
| Actin, conserved site                                  |
| ADP-ribosylation factor                                |
| Antifreeze protein, type I                             |
| Clathrin adaptor, sigma subunit/coatomer, zeta subunit |
| 14-3-3 protein                                         |
| ADP-ribosylation factor                                |
| Glyceraldehyde 3-phosphate dehydrogenase               |
| Ribulose-phosphate 3-epimerase                         |
| ADP-ribosylation factor                                |
| ADP-ribosylation factor                                |
| Ribosomal protein L18e                                 |
| Glutathione S-transferase, C-terminal-like             |
| Ribosomal protein L21e                                 |
| Ribosomal protein S7                                   |
| Ribosomal protein S6, eukaryotic                       |
| Ribosomal protein S24e                                 |
| Acyl carrier protein (ACP)                             |
| ADP-ribosylation factor                                |
| Glyceraldehyde 3-phosphate dehydrogenase               |
| ADP-ribosylation factor                                |
| Clathrin adaptor, sigma subunit/coatomer, zeta subunit |
| Disulphide isomerase                                   |
| Glutathione S-transferase, C-terminal                  |

|                                                                  |
|------------------------------------------------------------------|
| Bifunctional inhibitor/plant lipid transfer protein/seed storage |
| ADP-ribosylation factor                                          |
| Heavy metal transport/detoxification protein                     |
| Universal stress protein A                                       |
| Antifreeze protein, type I                                       |
| Antifreeze protein, type I                                       |
| Late embryogenesis abundant protein 2                            |
| ADP-ribosylation factor                                          |
| ADP-ribosylation factor                                          |
| ADP-ribosylation factor                                          |
| Glutathione S-transferase, C-terminal-like                       |
| Bifunctional inhibitor/plant lipid transfer protein/seed storage |
| Antifreeze protein, type I                                       |
| Antifreeze protein, type I                                       |
| Late embryogenesis abundant protein 2                            |
| Chlorophyll A-B binding protein                                  |
| Antifreeze protein, type I                                       |
| Photosystem II protein PsbR                                      |
| Photosystem I reaction centre subunit VI                         |
| Ubiquitous surface protein                                       |
| ADP-ribosylation factor                                          |
| ADP-ribosylation factor                                          |
| DEAD-like helicase, N-terminal                                   |
| ADP-ribosylation factor                                          |
| Chaperonin 21, chloroplast                                       |
| Chaperonin Cpn10                                                 |
| Peptidyl-prolyl cis-trans isomerase, FKBP-type                   |
| Chaperonin 21, chloroplast                                       |
| Carbohydrate-binding-like fold                                   |
| ADP-ribosylation factor                                          |
| Chaperonin Cpn10                                                 |
| Actin, conserved site                                            |
| DEAD-like helicase, N-terminal                                   |
| DEAD-like helicase, N-terminal                                   |
| Paraneoplastic encephalomyelitis antigen                         |
| Proliferating cell nuclear antigen, PCNA                         |
| Paraneoplastic encephalomyelitis antigen                         |
| Thioredoxin                                                      |
| ATPase, F0 complex, subunit G, mitochondrial                     |
| Acyl carrier protein (ACP)                                       |
| ATPase, V1 complex, subunit F, eukaryotic                        |
| Nebulin                                                          |
| ADP-ribosylation factor                                          |
| Actin, conserved site                                            |
| Glycoside hydrolase, family 1, active site                       |

|                                              |
|----------------------------------------------|
| ATPase, V1 complex, subunit F, eukaryotic    |
| ATPase, F0 complex, subunit G, mitochondrial |
| Proliferating cell nuclear antigen, PCNA     |
| ADP-ribosylation factor                      |
| RNA polymerase Rpb7, N-terminal              |
| High mobility group-like nuclear protein     |
| Ribosomal protein L14, bacterial-type        |
| Ribosomal protein S8                         |
| Ribosomal protein 60S                        |
| Acyl carrier protein (ACP)                   |
| ATPase, F0 complex, subunit G, mitochondrial |
| Longin-like                                  |
| ATPase, V1 complex, subunit F, eukaryotic    |
| ADP-ribosylation factor                      |
| Antifreeze protein, type I                   |
| Universal stress protein A                   |
| ADP-ribosylation factor                      |
| Antifreeze protein, type I                   |
| RNA polymerase Rpb7, N-terminal              |
| ATPase, V1 complex, subunit F, eukaryotic    |
| DEAD-like helicase, N-terminal               |
| Glycoside hydrolase, family 1, active site   |
| ADP-ribosylation factor                      |
| Nebulin                                      |
| Chaperonin Cpn10                             |
| Proliferating cell nuclear antigen, PCNA     |
| Adenovirus fibre protein                     |
| DEAD-like helicase, N-terminal               |
| ADP-ribosylation factor                      |
| ADP-ribosylation factor                      |
| Chaperonin Cpn10                             |
| Chaperonin 21, chloroplast                   |
| Chaperonin 21, chloroplast                   |
| ADP-ribosylation factor                      |
| Actin, conserved site                        |
| Paraneoplastic encephalomyelitis antigen     |
| DEAD-like helicase, N-terminal               |
| Cyclophilin-like                             |
| Helix-turn-helix type 3                      |
| DNA-binding TFAR19-related protein           |
| Paraneoplastic encephalomyelitis antigen     |
| Cyclophilin-like                             |
| ADP-ribosylation factor                      |
| Manganese and iron superoxide dismutase      |
| Disulphide isomerase                         |

|                                                                  |
|------------------------------------------------------------------|
| Glyceraldehyde 3-phosphate dehydrogenase                         |
| Ribulose-phosphate 3-epimerase                                   |
| Glutathione S-transferase, C-terminal                            |
| Acyl carrier protein (ACP)                                       |
| Glyceraldehyde 3-phosphate dehydrogenase                         |
| ADP-ribosylation factor                                          |
| Antifreeze protein, type I                                       |
| Clathrin adaptor, sigma subunit/coatomer, zeta subunit           |
| Actin, conserved site                                            |
| 14-3-3 protein                                                   |
| ADP-ribosylation factor                                          |
| ADP-ribosylation factor                                          |
| Glyceraldehyde 3-phosphate dehydrogenase                         |
| Ribulose-phosphate 3-epimerase                                   |
| ADP-ribosylation factor                                          |
| ADP-ribosylation factor                                          |
| Glutathione S-transferase, C-terminal-like                       |
| Ribosomal protein S6, eukaryotic                                 |
| Ribosomal protein L21e                                           |
| Ribosomal protein L18e                                           |
| Ribosomal protein S24e                                           |
| Ribosomal protein S7                                             |
| Acyl carrier protein (ACP)                                       |
| Bifunctional inhibitor/plant lipid transfer protein/seed storage |
| Disulphide isomerase                                             |
| Glyceraldehyde 3-phosphate dehydrogenase                         |
| ADP-ribosylation factor                                          |
| Glutathione S-transferase, C-terminal                            |
| ADP-ribosylation factor                                          |
| ADP-ribosylation factor                                          |
| Heavy metal transport/detoxification protein                     |
| Clathrin adaptor, sigma subunit/coatomer, zeta subunit           |
| Antifreeze protein, type I                                       |
| Antifreeze protein, type I                                       |
| Universal stress protein A                                       |
| Late embryogenesis abundant protein 2                            |
| ADP-ribosylation factor                                          |
| ADP-ribosylation factor                                          |
| ADP-ribosylation factor                                          |
| Glutathione S-transferase, C-terminal-like                       |
| Bifunctional inhibitor/plant lipid transfer protein/seed storage |
| Antifreeze protein, type I                                       |
| Antifreeze protein, type I                                       |
| Late embryogenesis abundant protein 2                            |
| Photosystem I reaction centre subunit VI                         |



|                                                        |
|--------------------------------------------------------|
| Antifreeze protein, type I                             |
| Photosystem II protein PsbR                            |
| Chlorophyll A-B binding protein                        |
| Ubiquitous surface protein                             |
| ADP-ribosylation factor                                |
| ADP-ribosylation factor                                |
| ADP-ribosylation factor                                |
| DEAD-like helicase, N-terminal                         |
| Chaperonin 21, chloroplast                             |
| Chaperonin Cpn10                                       |
| Chaperonin 21, chloroplast                             |
| Peptidyl-prolyl cis-trans isomerase, FKBP-type         |
| Carbohydrate-binding-like fold                         |
| Chaperonin 21, chloroplast                             |
| ADP-ribosylation factor                                |
| ADP-ribosylation factor                                |
| Kinesin, motor region                                  |
| ADP-ribosylation factor                                |
| ADP-ribosylation factor                                |
| Chaperonin 21, chloroplast                             |
| Ribosomal protein S5, C-terminal                       |
| Manganese and iron superoxide dismutase                |
| Disulphide isomerase                                   |
| Glyceraldehyde 3-phosphate dehydrogenase               |
| Histidine triad (HIT) protein                          |
| Ribulose-phosphate 3-epimerase                         |
| Glyceraldehyde 3-phosphate dehydrogenase               |
| ADP-ribosylation factor                                |
| Glutathione S-transferase, C-terminal                  |
| Glyceraldehyde 3-phosphate dehydrogenase               |
| Acyl carrier protein (ACP)                             |
| ATPase, V1 complex, subunit F, eukaryotic              |
| Glyceraldehyde 3-phosphate dehydrogenase               |
| Antifreeze protein, type I                             |
| 14-3-3 protein                                         |
| Clathrin adaptor, sigma subunit/coatomer, zeta subunit |
| ADP-ribosylation factor                                |
| ADP-ribosylation factor                                |
| ADP-ribosylation factor                                |
| ADP-ribosylation factor                                |
| Glyceraldehyde 3-phosphate dehydrogenase               |
| Glyceraldehyde 3-phosphate dehydrogenase               |
| Ribulose-phosphate 3-epimerase                         |
| ATPase, V1 complex, subunit F, eukaryotic              |
| ADP-ribosylation factor                                |

|                                                        |
|--------------------------------------------------------|
| ADP-ribosylation factor                                |
| ADP-ribosylation factor                                |
| Ribosomal protein L18e                                 |
| Glutathione S-transferase, C-terminal-like             |
| Ribosomal protein L21e                                 |
| Ribosomal protein S5, C-terminal                       |
| High mobility group-like nuclear protein               |
| Ribosomal protein 60S                                  |
| Ribosomal protein L11                                  |
| Ribosomal protein S6, eukaryotic                       |
| Acyl carrier protein (ACP)                             |
| Kinesin, motor region                                  |
| Glyceraldehyde 3-phosphate dehydrogenase               |
| Clathrin adaptor, sigma subunit/coatomer, zeta subunit |
| Glyceraldehyde 3-phosphate dehydrogenase               |
| ADP-ribosylation factor                                |
| Glutathione S-transferase, C-terminal                  |
| Disulphide isomerase                                   |
| ADP-ribosylation factor                                |
| ATPase, V1 complex, subunit F, eukaryotic              |
| ADP-ribosylation factor                                |
| ADP-ribosylation factor                                |
| Longin-like                                            |
| Late embryogenesis abundant protein 2                  |
| Antifreeze protein, type I                             |
| ADP-ribosylation factor                                |
| ADP-ribosylation factor                                |
| ADP-ribosylation factor                                |
| ADP-ribosylation factor                                |
| Glutathione S-transferase, C-terminal-like             |
| Late embryogenesis abundant protein 2                  |
| Antifreeze protein, type I                             |
| Photosystem II protein PsbR                            |
| Antifreeze protein, type I                             |
| Photosystem I reaction centre subunit VI               |
| Ubiquitous surface protein                             |
| ATPase, V1 complex, subunit F, eukaryotic              |
| ADP-ribosylation factor                                |
| ADP-ribosylation factor                                |
| ADP-ribosylation factor                                |
| ADP-ribosylation factor                                |
| Chaperonin 21, chloroplast                             |
| Chaperonin 21, chloroplast                             |
| Adenovirus fibre protein                               |
| ADP-ribosylation factor                                |

|                                                 |
|-------------------------------------------------|
| Chaperonin Cpn10                                |
| ADP-ribosylation factor                         |
| Kinesin, motor region                           |
| Nucleoside diphosphate kinase, core             |
| Chaperonin 21, chloroplast                      |
| Chaperonin 21, chloroplast                      |
| ADP-ribosylation factor                         |
| ADP-ribosylation factor                         |
| ADP-ribosylation factor                         |
| Armadillo                                       |
| 3'-5' exonuclease                               |
| Paraneoplastic encephalomyelitis antigen        |
| Alba, DNA/RNA-binding protein                   |
| Alba, DNA/RNA-binding protein                   |
| Histone core                                    |
| Histone core                                    |
| DNA-binding TFAR19-related protein              |
| Histone core                                    |
| Histone core                                    |
| Cyclophilin-like                                |
| Helix-turn-helix type 3                         |
| Histone core                                    |
| High mobility group protein HMG14 and HMG17     |
| Ribosomal protein S5, C-terminal                |
| Paraneoplastic encephalomyelitis antigen        |
| Antifreeze protein, type I                      |
| Histidine triad (HIT) protein                   |
| Manganese and iron superoxide dismutase         |
| ETC complex I subunit conserved region          |
| Peptidyl-prolyl cis-trans isomerase, PpiC-type  |
| ETC complex I subunit                           |
| ADP-ribosylation factor                         |
| BTB/POZ fold                                    |
| Glutaredoxin                                    |
| Cyclophilin-like                                |
| Glyceraldehyde 3-phosphate dehydrogenase        |
| Ribulose bisphosphate carboxylase, small chain  |
| Glyceraldehyde 3-phosphate dehydrogenase        |
| Thioredoxin                                     |
| Glutaredoxin                                    |
| Electron transport accessory protein            |
| Disulphide isomerase                            |
| Histidine triad (HIT) protein                   |
| Cytochrome bd ubiquinol oxidase, 14 kDa subunit |
| Ribulose-phosphate 3-epimerase                  |

|                                                                  |
|------------------------------------------------------------------|
| 3'-5' exonuclease                                                |
| Glutathione S-transferase, C-terminal                            |
| Glyceraldehyde 3-phosphate dehydrogenase                         |
| Cytochrome bd ubiquinol oxidase, 14 kDa subunit                  |
| Glyceraldehyde 3-phosphate dehydrogenase                         |
| Mitochondrial import translocase, subunit Tom7                   |
| Adenine nucleotide translocator 1                                |
| Prefoldin                                                        |
| 14-3-3 protein                                                   |
| Mitochondrial import translocase, subunit Tom7                   |
| Clathrin adaptor, sigma subunit/coatomer, zeta subunit           |
| ADP-ribosylation factor                                          |
| ADP-ribosylation factor                                          |
| Clp, N-terminal                                                  |
| Antifreeze protein, type I                                       |
| ADP-ribosylation factor                                          |
| Armadillo                                                        |
| Glyceraldehyde 3-phosphate dehydrogenase                         |
| Glyceraldehyde 3-phosphate dehydrogenase                         |
| Phosphoglycerate kinase                                          |
| Ribulose-phosphate 3-epimerase                                   |
| Nucleoside diphosphate kinase, core                              |
| 3'-5' exonuclease                                                |
| ADP-ribosylation factor                                          |
| ADP-ribosylation factor                                          |
| Ribosomal protein L11                                            |
| Ribosomal protein L18, bacterial                                 |
| Ribosomal protein L31e                                           |
| Ribosomal protein S5, C-terminal                                 |
| Ribosomal protein L35Ae                                          |
| Ribosomal protein L11                                            |
| Ribosomal protein L21e                                           |
| Ribosomal protein S6, eukaryotic                                 |
| Nucleic acid-binding, OB-fold-like                               |
| Nucleic acid-binding, OB-fold-like                               |
| Ribosomal protein S7                                             |
| Ribosomal protein L37e                                           |
| High mobility group-like nuclear protein                         |
| Glutathione S-transferase, C-terminal-like                       |
| Ribosomal protein 60S                                            |
| Ribosomal protein L18e                                           |
| KOW                                                              |
| Kinesin, motor region                                            |
| ADP-ribosylation factor                                          |
| Bifunctional inhibitor/plant lipid transfer protein/seed storage |

|                                                                  |
|------------------------------------------------------------------|
| ADP-ribosylation factor                                          |
| ADP-ribosylation factor                                          |
| Bifunctional inhibitor/plant lipid transfer protein/seed storage |
| emp24/gp25L/p24                                                  |
| Glyceraldehyde 3-phosphate dehydrogenase                         |
| Adenine nucleotide translocator 1                                |
| Disulphide isomerase                                             |
| ADP-ribosylation factor                                          |
| Glutathione S-transferase, C-terminal                            |
| Heavy metal transport/detoxification protein                     |
| Mitochondrial import translocase, subunit Tom7                   |
| ADP-ribosylation factor                                          |
| Glyceraldehyde 3-phosphate dehydrogenase                         |
| Clathrin adaptor, sigma subunit/coatomer, zeta subunit           |
| Antifreeze protein, type I                                       |
| Late embryogenesis abundant protein 2                            |
| Antifreeze protein, type I                                       |
| ADP-ribosylation factor                                          |
| Glutathione S-transferase, C-terminal-like                       |
| Bifunctional inhibitor/plant lipid transfer protein/seed storage |
| Bifunctional inhibitor/plant lipid transfer protein/seed storage |
| Antifreeze protein, type I                                       |
| Antifreeze protein, type I                                       |
| Late embryogenesis abundant protein 2                            |
| Chlorophyll A-B binding protein                                  |
| Electron transport accessory protein                             |
| Chlorophyll A-B binding protein                                  |
| Mog1/PsbP/DUF1795, alpha/beta/alpha sandwich                     |
| Antifreeze protein, type I                                       |
| Photosystem I reaction centre subunit VI                         |
| Photosystem II protein PsbR                                      |
| Nucleoside diphosphate kinase, core                              |
| Phosphoglycerate kinase                                          |
| Armadillo                                                        |
| Ubiquitous surface protein                                       |
| Armadillo                                                        |
| ADP-ribosylation factor                                          |
| ADP-ribosylation factor                                          |
| D-tyrosyl-tRNA(Tyr) deacylase                                    |
| ADP-ribosylation factor                                          |
| Chaperonin 21, chloroplast                                       |

|                                                 |
|-------------------------------------------------|
| Prefoldin                                       |
| Peptidyl-prolyl cis-trans isomerase, FKBP-type  |
| Chaperonin 21, chloroplast                      |
| Clp, N-terminal                                 |
| Chaperonin Cpn10                                |
| ETC complex I subunit                           |
| Cytochrome bd ubiquinol oxidase, 14 kDa subunit |
| Proteinase inhibitor I25, cystatin              |
| Carbohydrate-binding-like fold                  |
| Adenovirus fibre protein                        |
| Armadillo                                       |
| ADP-ribosylation factor                         |
| Actin, conserved site                           |
| DEAD-like helicase, N-terminal                  |
| Chaperonin Cpn10                                |
| ADP-ribosylation factor                         |
| Chaperonin Cpn10                                |
| Nucleoside diphosphate kinase, core             |
| Alba, DNA/RNA-binding protein                   |
| Paraneoplastic encephalomyelitis antigen        |
| DEAD-like helicase, N-terminal                  |
| RNA recognition motif, RNP-1                    |
| Alba, DNA/RNA-binding protein                   |
| Helix-turn-helix type 3                         |
| Histone core                                    |
| Cyclophilin-like                                |
| DNA-binding TFAR19-related protein              |
| High mobility group protein HMG14 and HMG17     |
| Histone core                                    |
| Histone core                                    |
| Histone core                                    |
| Proliferating cell nuclear antigen, PCNA        |
| Histone core                                    |
| Histone core                                    |
| Paraneoplastic encephalomyelitis antigen        |
| Glutaredoxin                                    |
| Antifreeze protein, type I                      |
| Ribulose bisphosphate carboxylase, small chain  |
| ETC complex I subunit conserved region          |
| BTB/POZ fold                                    |
| Peptidyl-prolyl cis-trans isomerase, PpiC-type  |
| Cytochrome bd ubiquinol oxidase, 14 kDa subunit |
| Electron transport accessory protein            |
| Thioredoxin                                     |
| Histidine triad (HIT) protein                   |

|                                                                  |
|------------------------------------------------------------------|
| Glutaredoxin                                                     |
| Thioredoxin                                                      |
| Cyclophilin-like                                                 |
| Mitochondrial import translocase, subunit Tom7                   |
| Adenine nucleotide translocator 1                                |
| Cytochrome bd ubiquinol oxidase, 14 kDa subunit                  |
| ATPase, F0 complex, subunit G, mitochondrial                     |
| Clp, N-terminal                                                  |
| Mitochondrial import translocase, subunit Tom7                   |
| Actin, conserved site                                            |
| Prefoldin                                                        |
| Nebulin                                                          |
| Peptidase S8 and S53, subtilisin, kexin, sedolisin               |
| Glycoside hydrolase, family 1, active site                       |
| Armadillo                                                        |
| ATPase, F0 complex, subunit G, mitochondrial                     |
| Nucleoside diphosphate kinase, core                              |
| Proliferating cell nuclear antigen, PCNA                         |
| RNA polymerase Rpb7, N-terminal                                  |
| Ribosomal protein L35Ae                                          |
| Ribosomal protein S24e                                           |
| Ribosomal protein L31e                                           |
| Eukaryotic initiation factor 5A hypusine (eIF-5A)                |
| Ribosomal protein 60S                                            |
| Ribosomal protein L15                                            |
| Ribosomal protein 60S                                            |
| Antifreeze protein, type I                                       |
| Nucleic acid-binding, OB-fold-like                               |
| Ribosomal protein L11                                            |
| Nucleic acid-binding, OB-fold-like                               |
| Ribosomal protein L14, bacterial-type                            |
| Ribosomal protein S7                                             |
| Ribosomal protein S15, eukaryotic/archaeal                       |
| Ribosomal protein S8                                             |
| KOW                                                              |
| Ribosomal protein L18, bacterial                                 |
| emp24/gp25L/p24                                                  |
| Bifunctional inhibitor/plant lipid transfer protein/seed storage |
| Bifunctional inhibitor/plant lipid transfer protein/seed storage |
| ADP-ribosylation factor                                          |
| Adenine nucleotide translocator 1                                |
| ADP-ribosylation factor                                          |
| ATPase, F0 complex, subunit G, mitochondrial                     |
| Mitochondrial import translocase, subunit Tom7                   |
| Heavy metal transport/detoxification protein                     |

|                                                                  |
|------------------------------------------------------------------|
| Antifreeze protein, type I                                       |
| Antifreeze protein, type I                                       |
| Universal stress protein A                                       |
| Antifreeze protein, type I                                       |
| ADP-ribosylation factor                                          |
| ADP-ribosylation factor                                          |
| Eukaryotic initiation factor 5A hypusine (eIF-5A)                |
| Bifunctional inhibitor/plant lipid transfer protein/seed storage |
| Bifunctional inhibitor/plant lipid transfer protein/seed storage |
| Antifreeze protein, type I                                       |
| Antifreeze protein, type I                                       |
| Antifreeze protein, type I                                       |
| Mog1/PsbP/DUF1795, alpha/beta/alpha sandwich                     |
| Electron transport accessory protein                             |
| Nucleoside diphosphate kinase, core                              |
| Armadillo                                                        |
| Armadillo                                                        |
| RNA polymerase Rpb7, N-terminal                                  |
| DEAD-like helicase, N-terminal                                   |
| Glycoside hydrolase, family 1, active site                       |
| Peptidase S8 and S53, subtilisin, kexin, sedolisin               |
| D-tyrosyl-tRNA(Tyr) deacylase                                    |
| Chaperonin Cpn10                                                 |
| Peptidase S8 and S53, subtilisin, kexin, sedolisin               |
| Clp, N-terminal                                                  |
| Prefoldin                                                        |
| Nebulin                                                          |
| Peptidyl-prolyl cis-trans isomerase, FKBP-type                   |
| Peptidyl-prolyl cis-trans isomerase, FKBP-type                   |
| Chaperonin Cpn10                                                 |
| Cytochrome bd ubiquinol oxidase, 14 kDa subunit                  |
| Proteinase inhibitor I25, cystatin                               |
| Proliferating cell nuclear antigen, PCNA                         |
| Carbohydrate-binding-like fold                                   |
